# Supplementary material for: Comparative evaluation of the performance of nine Machine Learning models for predicting corn yield based on uncalibrated empirical data in Cameroon
Source: Research Square preprint supplement (doi:10.21203/rs.3.rs-8046361/v1), 2026-01-19
Supplement: Supplementary file 1 [file 04f1618e2d5559fb2ab16fb1.xlsx]

## Sheet: Feuille5
SEXE	AGE	NBRE MEMBRE	HE	DO	AC	COVE	VE	CO	Supmais (ha)	SYSTÈME CULTURE	LAB	LS	SD	DENSITE SEMIS	VARIETE	FERTILISATION	QUANTITE (Kg)	Fre-fertilisation	CONTRAINTE PROD-FER	RENDEMENT (Kg/ha)	DEPENSE/Ha (FCFA)	GAIN/Ha	HER	DMHE	DM	NSS	HOUES	TYPE	Fre-pesticides	COUT
1	32	12	1	0	0	1	0	0	3	1	1	0	0	50000	0	1	100	2	1	3000	300000	750000	1	0	0	1	0	0	3	60000
1	51	9	1	0	0	1	0	0	4	1	0	1	0	47620	0	1	100	2	1	1400	100000	168000	1	0	0	1	0	0	2	30000
1	42	5	1	0	0	1	0	0	1.5	1	1	0	0	47620	0	1	100	2	1	1700	100000	204000	1	0	0	1	0	0	3	50000
1	47	15	1	0	0	1	0	0	8	1	0	1	0	50000	1	1	50	1	1	2500	250000	312500	1	0	0	1	0	0	3	80000
1	28	1	1	0	0	1	0	0	1	1	1	0	0	50000	0	1	50	2	0	2700	130000	351000	0	1	0	1	0	0	3	25000
1	45	10	1	0	0	1	0	0	10	1	0	0	1	50000	0	1	100	2	0	1400	200000	210000	1	0	0	1	0	0	3	25000
1	46	10	0	1	0	1	0	0	5	1	0	0	1	25000	0	1	100	2	1	2500	100000	250000	1	0	0	1	0	0	2	25000
1	51	11	0	1	0	0	1	0	2	1	0	0	1	41666	0	1	100	2	0	1500	200000	240000	1	0	0	1	0	0	3	35000
1	44	9	1	0	0	1	0	0	1.5	1	0	1	0	31250	0	1	100	2	0	2000	100000	200000	1	0	0	1	0	0	2	15000
0	34	6	0	0	1	1	0	0	1.5	1	1	0	0	31250	0	1	100	2	0	2000	150000	200000	1	0	0	1	0	0	2	15000
1	47	12	0	0	1	0	0	1	2	0	1	0	0	41666	0	1	100	2	0	2000	120000	240000	1	0	0	1	0	0	2	20000
1	39	5	1	0	0	0	0	1	6	0	1	0	0	31250	0	1	100	2	0	1000	100000	12000	1	0	0	1	0	0	2	20000
0	29	7	1	0	0	1	0	0	1	1	0	0	1	31250	0	1	100	2	0	2500	70000	250000	0	1	0	1	0	0	3	35000
0	60	4	1	0	0	0	0	1	1	1	0	0	1	31250	0	0	400	1	1	1000	25000	10000	0	0	1	0	1	0	2
0	50	6	0	1	0	0	0	1	1	1	0	0	1	37000	0	1	50	1	0	2000	70000	260000	1	0	0	1	0	0	3	30000
1	57	14	0	1	0	1	0	0	15	1	0	1	0	25000	0	1	200	2	0	2500	100000	250000	0	1	0	1	0	0	2	25000
1	34	4	0	1	0	0	0	1	1	1	0	0	1	66666	0	1	50	1	0	2000	70000	200000	1	0	0	1	0	0	2	30000
1	53	20	1	0	0	1	0	0	3	1	0	1	0	41666	1	1	100	2	1	2200	100000	220000	1	0	0	1	0	0	3	50000
1	50	12	1	0	0	1	0	0	1.75	1	0	1	0	57142	1	1	100	2	1	3400	100000	340000	1	0	0	1	0	0	2	25000
1	36	12	0	0	1	1	0	0	6	1	0	1	0	31250	0	1	100	2	0	2000	100000	200000	1	0	0	1	0	0	3	35000
1	45	9	0	1	0	0	0	1	1.5	1	1	0	0	50000	0	1	50	1	0	2000	50000	200000	1	0	0	1	0	0	2	15000
1	38	7	0	1	0	1	0	0	2	1	0	0	1	31250	0	1	100	2	0	4000	200000	480000	1	0	0	1	0	0	3	75000
1	43	9	0	0	1	1	0	0	1	1	0	1	0	40000	0	1	100	2	0	3000	200000	375000	1	0	0	1	0	0	3	35000
1	49	10	1	0	0	1	0	0	4	1	0	1	0	50000	0	1	100	2	0	3500	220000	455000	1	0	0	1	0	0	3	45000
0	26	4	LO	LO	LO	0	0	1	1	1	0	0	1	41666	0	1	100	2	0	2800	60000	280000	1	0	0	1	0	0	3	25000
1	34	1	1	0	0	1	0	0	1.5	1	1	0	0	50000	0	1	100	2	0	2800	120000	420000	0	1	0	1	0	0	2	18000
1	47	9	1	0	0	1	0	0	4	0	0	1	0	31250	0	1	200	2	1	3000	180000	300000	0	1	0	1	0	0	3	25000
1	45	10	LO	LO	LO	1	0	0	1	1	0	0	1	31250	0	1	200	3	0	2000	200000	300000	1	0	0	1	0	0	2	30000
1	45	5	1	0	0	1	0	0	1.5	1	0	0	1	50000	0	1	100	2	0	3000	100000	510000	1	0	0	1	0	0	3	45000
1	49	15	1	0	0	1	0	0	2	1	0	0	1	50000	0	1	200	2	0	2600	80000	260000	1	0	0	1	0	0	2	25000
0	28	7	0	0	1	1	0	0	1.5	1	0	1	0	50000	0	0	200	1	0	1500	40000	150000	1	0	0	1	0	0	3	25000
1	52	10	0	1	0	1	0	0	1.5	1	0	0	1	31250	1	1	300	2	0	2400	80000	240000	1	0	0	0	0	1	3	20000
1	41	15	1	0	0	1	0	0	3.5	1	0	1	0	41666	0	1	100	1	1	3400	110000	544000	0	1	0	1	0	0	3	30000
1	42	11	0	0	1	0	0	1	1.5	1	1	0	0	66666	0	1	100	1	0	3000	120000	375000	1	0	0	1	0	0	2	60000
1	43	6	1	0	0	1	0	0	1	1	1	0	0	50000	1	1	200	2	0	4000	100000	500000	0	1	0	1	0	0	1	40000
1	25	10	0	0	1	0	0	1	1	1	0	1	0	41666	0	1	100	2	0	3500	200000	350000	1	0	0	1	0	0	4	60000
0	60	9	1	0	0	0	0	1	2	1	1	0	0	47619	0	0	100	1	0	1000	15000	100000	0	0	1	0	1	0	3
1	44	10	0	1	0	1	0	0	2	1	1	0	0	37000	0	1	100	1	0	2600	100000	260000	0	1	0	1	0	0	2	30000
0	22	9	1	0	0	1	0	0	3	1	0	0	1	25000	0	1	200	2	1	3000	120000	360000	1	0	0	1	0	0	2	40000
0	37	7	1	0	0	1	0	0	1	0	1	0	0	25000	1	1	100	2	1	1300	100000	130000	0	0	1	0	1	0	2
1	43	10	0	1	0	1	0	0	4	1	1	0	0	66666	0	1	150	2	0	2000	150000	350000	1	0	0	1	0	0	2	25000
1	47	12	0	0	1	0	0	1	5	1	0	0	1	31250	0	1	200	2	0	3000	100000	300000	1	0	0	1	0	0	2	20000
0	66	11	1	0	0	1	0	0	1.5	1	1	0	0	25000	0	1	100	1	1	1500	50000	150000	0	0	1	0	1	0	2
0	41	3	1	0	0	1	0	0	1	1	0	0	1	31250	0	1	150	2	1	2800	200000	364000	0	1	0	1	0	0	2	25000
1	68	10	0	1	0	1	0	0	3	1	1	0	0	25000	0	1	200	2	0	4000	150000	480000	0	1	0	1	0	0	2	30000
1	36	11	0	1	0	1	0	0	1	1	1	0	0	31250	0	1	100	1	0	3500	100000	350000	1	0	0	1	0	0	1	40000
1	45	9	1	0	0	1	0	0	1	1	1	0	0	41666	0	1	100	1	0	1300	35000	130000	1	0	0	1	0	0	2	20000
1	57	8	0	1	0	1	0	0	3	1	0	1	0	31250	1	1	200	2	1	3000	120000	300000	0	1	0	1	0	0	2	25000
1	21	8	1	0	0	1	0	0	3	1	1	0	0	41666	0	1	100	1	1	2000	100000	250000	1	0	0	0	0	1	2	20000
1	47	13	1	0	0	1	0	0	2	1	0	0	1	31250	0	1	100	1	1	1700	150000	212500	1	0	0	1	0	0	2	24000
1	26	6	1	0	0	1	0	0	1	1	1	0	0	25000	1	1	100	2	1	1600	100000	200000	1	0	0	1	0	0	2	20000
1	27	8	1	0	0	1	0	0	1	1	1	0	0	25000	0	1	100	2	1	2700	150000	324000	0	1	0	0	0	1	2	94000
1	22	6	1	0	0	1	0	0	1	1	1	0	0	25000	0	1	200	2	1	2900	95000	348000	1	0	0	0	0	1	2	25000
1	20	7	1	0	0	1	0	0	2.5	1	1	0	0	31250	1	1	200	2	1	4500	250000	540000	1	0	0	0	0	1	2	30000
1	54	18	1	0	0	1	0	0	6	1	1	0	0	31250	0	1	150	2	1	1200	80000	150000	1	0	0	0	0	1	2	25000
1	28	10	0	1	0	1	0	0	1.5	1	1	0	0	31250	1	1	100	1	1	3000	120000	300000	1	0	0	0	0	1	2	30000
1	42	17	0	0	1	1	0	0	2	1	1	0	0	37000	1	1	200	2	1	2800	120000	280000	1	0	0	0	0	1	1	12000
1	43	8	0	0	1	1	0	0	1	1	0	0	1	37000	1	1	100	1	1	1000	34000	100000	1	0	0	1	0	0	2	22000
0	40	4	1	0	0	1	0	0	1	1	0	0	1	25000	1	1	100	1	1	1300	75000	130000	1	0	0	1	0	0	2	10500
1	37	2	1	0	0	1	0	0	3	1	0	1	0	41666	0	1	100	1	0	2000	205000	500000	1	0	0	1	0	0	3	40000
1	42	15	1	0	0	1	0	0	4.5	1	0	1	0	31250	0	1	100	1	0	2500	250000	500000	1	0	0	1	0	0	2	25000
1	46	10	1	0	0	1	0	0	20	1	0	0	1	31250	0	1	100	1	0	2000	75000	200000	1	0	0	1	0	0	2	20000
1	42	8	1	0	0	1	0	0	3	1	0	0	1	41666	0	1	150	2	1	2500	90000	250000	1	0	0	1	0	0	2	25000
0	39	10	0	1	0	1	0	0	1	1	1	0	0	31250	0	1	100	1	1	2400	100000	240000	1	0	0	0	0	1	2	20000
1	53	14	1	0	0	1	0	0	4	1	0	1	0	41666	0	1	200	2	0	3000	150000	360000	0	1	0	1	0	0	3	40000
1	44	9	1	0	0	1	0	0	3	1	0	0	1	37000	0	1	200	2	1	3400	180000	400000	0	1	0	1	0	0	3	50000
1	48	11	1	0	0	1	0	0	2	1	1	0	0	41666	1	1	150	2	1	2400	120000	280000	1	0	0	1	0	0	3	40000
1	54	8	1	0	0	1	0	0	5	1	0	1	0	25000	0	1	200	2	0	3000	200000	360000	0	1	0	1	0	0	2	35000
1	56	7	0	1	0	1	0	0	3	1	0	0	1	31250	0	1	150	2	1	2800	130000	280000	1	0	0	1	0	0	3	30000
0	42	12	0	1	0	0	0	1	1.5	1	1	0	0	25000	0	1	100	1	0	2000	100000	200000	1	0	0	0	0	1	2	25000
1	32	6	1	0	0	0	1	0	2	1	1	0	0	41666	1	1	200	2	1	2500	120000	312500	1	0	0	0	0	1	2	30000
1	51	9	1	0	0	1	0	0	2.5	1	0	0	1	31250	0	1	150	2	1	2000	100000	240000	1	0	0	1	0	0	3	40000
1	45	13	0	1	0	1	0	0	4	1	1	0	0	37000	0	1	200	2	1	3000	180000	360000	1	0	0	0	0	1	2	25000
1	56	16	1	0	0	1	0	0	5	1	1	0	0	25000	0	1	100	1	1	2800	140000	280000	0	1	0	1	0	0	2	30000
1	28	8	1	0	0	1	0	0	1	1	1	0	0	31250	0	1	100	1	0	2400	100000	240000	1	0	0	0	0	1	2	20000
1	37	7	1	0	0	1	0	0	3	1	1	0	0	31250	0	1	150	2	0	2000	120000	240000	1	0	0	0	0	1	2	25000
1	43	9	0	1	0	1	0	0	2	1	0	0	1	41666	0	1	200	2	1	3400	150000	425000	1	0	0	1	0	0	3	50000
0	36	11	0	1	0	0	0	1	1	1	1	0	0	31250	0	0	200	1	1	1500	25000	150000	0	0	1	0	1	0	2
1	45	18	1	0	0	1	0	0	5	1	0	1	0	41666	0	1	100	1	1	2400	120000	300000	1	0	0	1	0	0	3	50000
1	36	12	0	0	1	1	0	0	6	1	0	1	0	31250	0	1	100	2	0	2000	100000	200000	1	0	0	1	0	0	3	35000
1	45	9	0	1	0	0	0	1	1.5	1	1	0	0	50000	0	1	50	1	0	2000	50000	200000	1	0	0	1	0	0	2	15000
1	38	7	0	1	0	1	0	0	2	1	0	0	1	31250	0	1	100	2	0	4000	200000	480000	1	0	0	1	0	0	3	75000
1	43	9	0	0	1	1	0	0	1	1	0	1	0	40000	0	1	100	2	0	3000	200000	375000	1	0	0	1	0	0	3	35000
1	49	10	1	0	0	1	0	0	4	1	0	1	0	50000	0	1	100	2	0	3500	220000	455000	1	0	0	1	0	0	3	45000
0	26	4	LO	LO	LO	0	0	1	1	1	0	0	1	41666	0	1	100	2	0	2800	60000	280000	1	0	0	1	0	0	3	25000
1	34	1	1	0	0	1	0	0	1.5	1	1	0	0	50000	0	1	100	2	0	2800	120000	420000	0	1	0	1	0	0	2	18000
1	47	9	1	0	0	1	0	0	4	0	0	1	0	31250	0	1	200	2	1	3000	180000	300000	0	1	0	1	0	0	3	25000
1	45	10	0	1	0	1	0	0	1	1	0	0	1	31250	0	1	200	3	0	2000	200000	300000	1	0	0	1	0	0	2	30000
1	45	5	1	0	0	1	0	0	1.5	1	0	0	1	50000	0	1	100	2	0	3000	100000	510000	1	0	0	1	0	0	3	45000
1	49	15	1	0	0	1	0	0	2	1	0	0	1	50000	0	1	200	2	0	2600	80000	260000	1	0	0	1	0	0	2	25000
0	28	7	0	0	1	1	0	0	1.5	1	0	1	0	50000	0	0	200	1	0	1500	40000	150000	1	0	0	1	0	0	3	25000
1	45	10	1	0	0	1	0	0	10	1	0	0	1	50000	0	1	100	2	0	1400	200000	210000	1	0	0	1	0	0	3	25000
1	48	12	1	0	0	1	0	0	4	1	0	0	1	50000	0	1	150	2	0	1800	100000	180000	1	0	0	1	0	0	3	30000
1	46	10	0	1	0	1	0	0	5	1	0	0	1	25000	0	1	100	2	1	2500	100000	250000	1	0	0	1	0	0	2	25000
1	45	8	1	0	0	1	0	0	2	1	0	1	0	44444	0	1	200	2	0	4000	220000	400000	1	0	0	1	0	0	2	20000
1	46	14	1	0	0	1	0	0	8.75	1	0	1	0	41619	0	1	200	2	0	2400	80000	360000	1	0	0	1	0	0	3	35000
1	55	17	1	0	0	0	0	1	2	1	0	0	1	53333	0	1	100	1	0	1200	50000	120000	1	0	0	1	0	0	2	15000
1	18	5	1	0	0	0	0	1	1	0	1	0	0	50000	0	1	150	2	1	1600	80000	160000	1	0	0	1	0	0	2	20000
1	26	19	0	0	1	1	0	0	2	0	1	0	0	50000	0	1	150	2	1	1200	60000	120000	0	1	0	1	0	0	3	50000
1	40	5	0	1	0	1	0	0	8	1	1	0	0	50000	0	1	100	1	0	1500	75000	150000	0	1	0	0	0	1	2	25000
1	22	2	1	0	0	1	0	0	2	1	1	0	0	41666	0	1	100	2	0	3200	100000	384000	1	0	0	1	0	0	2	30000
1	30	1	LO	LO	LO	0	1	0	3	1	1	0	0	31250	0	1	300	2	0	3200	200000	384000	0	1	0	0	0	1	1	20000
1	21	5	1	0	0	1	0	0	1	0	1	0	0	41619	0	1	100	1	0	2800	45000	336000	0	1	0	1	0	0	2	48000
1	35	9	0	0	1	1	0	0	1.5	1	0	1	0	50000	0	1	150	1	0	2400	80000	240000	0	1	0	1	0	0	2	21000
1	30	4	0	0	1	1	0	0	1	1	1	0	0	50000	0	1	150	2	0	4000	150000	400000	0	1	0	1	0	0	2	50000
1	36	12	1	0	0	1	0	0	2	1	1	0	0	50000	0	1	200	2	1	4400	150000	400000	0	1	0	1	0	0	2	50000
1	33	12	1	0	0	1	0	0	3	1	1	0	0	50000	0	1	250	2	0	3200	150000	320000	0	1	0	1	0	0	2	50000
1	45	16	1	0	0	1	0	0	2	1	0	0	1	50000	0	1	200	2	0	3200	240000	384000	1	0	0	1	0	0	3	60000
1	23	2	1	0	0	1	0	0	1.5	1	1	0	0	31250	0	1	200	2	0	1100	100000	132000	1	0	0	1	0	0	1	20000
1	52	23	1	0	0	1	0	0	12	1	1	0	0	31250	0	1	150	2	0	4400	300000	528000	1	0	0	0	0	1	2	20000
1	32	7	0	0	1	1	0	0	1	1	0	1	0	41666	0	1	200	2	0	3600	200000	360000	1	0	0	1	0	0	3	60000
1	30	4	0	0	1	0	0	1	1	1	0	0	1	41666	0	1	200	2	0	3200	60000	320000	1	0	0	1	0	0	2	20000
0	21	4	0	1	0	0	0	1	1	1	1	0	0	41666	0	1	150	2	0	1500	100000	150000	1	0	0	1	0	0	1	15000
1	25	15	0	1	0	1	0	0	1.75	0	1	0	0	31250	0	1	400	2	0	5000	400000	900000	0	1	0	1	0	0	2	30000
1	32	5	1	0	0	0	0	1	1	1	1	0	0	50000	1	1	200	2	0	3200	120000	320000	1	0	0	1	0	0	4	60000
1	41	7	1	0	0	1	0	0	4	1	1	0	0	50000	0	1	200	2	0	4000	150000	400000	1	0	0	0	0	1	1	15000
1	45	15	1	0	0	1	0	0	5	1	1	0	0	50000	0	1	200	2	1	2500	200000	325000	0	1	0	0	0	1	2	25000
1	30	6	1	0	0	1	0	0	3	1	1	0	0	50000	0	1	150	2	1	2000	100000	240000	0	1	0	0	0	1	2	30000
1	47	6	1	0	0	1	0	0	4	1	0	0	1	40000	0	1	200	2	0	4000	160000	400000	0	1	0	1	0	0	2	30000
1	60	4	1	0	0	1	0	0	2.5	1	1	0	0	41666	1	1	200	2	1	3500	130000	350000	1	0	0	0	0	1	2	25000
1	62	9	0	1	0	1	0	0	3	1	1	0	0	41666	0	1	300	2	1	3600	220000	360000	0	1	0	0	0	1	2	20000
1	60	12	1	0	0	1	0	0	20	1	1	0	0	50000	1	1	200	2	1	5000	180000	500000	1	0	0	0	0	1	2	22500
1	70	8	1	0	0	1	0	0	1	1	0	1	0	31250	1	1	200	2	1	4500	150000	450000	1	0	0	1	0	0	3	70000
1	55	13	1	0	0	1	0	0	2	1	1	0	0	50000	0	1	250	2	1	4000	200000	400000	0	1	0	1	0	0	3	60000
1	49	11	1	0	0	1	0	0	4	1	1	0	0	50000	0	1	200	2	0	4000	150000	400000	1	0	0	1	0	0	2	25000
1	57	13	1	0	0	1	0	0	2	1	0	0	1	31250	1	1	200	1	1	4100	300000	410000	1	0	0	1	0	0	3	40000
1	25	7	1	0	0	1	0	0	1.5	1	0	0	1	41619	0	1	150	2	1	1200	75000	120000	1	0	0	1	0	0	2	15000
1	35	8	1	0	0	1	0	0	3	1	0	0	1	41619	0	1	300	2	1	5000	300000	500000	1	0	0	1	0	0	3	65000
0	30	7	0	0	1	1	0	0	1	1	0	1	0	41666	1	1	150	2	1	2000	130000	250000	1	0	0	1	0	0	2	25000
0	45	9	0	1	0	1	0	0	1	1	0	1	0	41666	1	1	150	2	1	2500	75000	250000	1	0	0	1	0	0	3	50000
1	35	12	1	0	0	1	0	0	4.5	1	0	1	0	31250	1	1	200	2	1	2800	150000	350000	1	0	0	1	0	0	3	40000
1	39	10	0	0	1	1	0	0	3	1	0	1	0	41666	0	1	200	2	1	4000	200000	400000	1	0	0	1	0	0	3	50000
1	22	6	1	0	0	1	0	0	1	1	1	0	0	41666	0	1	150	2	1	1500	80000	150000	0	0	1	0	1	0	2	20000
0	25	3	0	0	1	1	0	0	1.5	0	1	0	0	31250	0	1	100	2	0	1500	85000	150000	0	0	1	0	1	0	2	30000
1	27	5	1	0	0	1	0	0	1	1	1	0	0	37000	1	1	200	2	1	2800	125000	350000	1	0	0	0	0	1	2	20000
1	21	6	1	0	0	1	0	0	1	1	0	0	1	31250	1	1	100	1	1	1200	100000	150000	1	0	0	1	0	0	2	15000
1	37	20	1	0	0	1	0	0	15	1	0	1	0	41619	0	1	200	2	1	1200	100000	150000	1	0	0	1	0	0	2	20000
1	30	16	1	0	0	1	0	0	1.25	1	1	0	0	41619	0	1	300	2	1	4200	300000	525000	1	0	0	1	0	0	3	50000
1	35	10	1	0	0	1	0	0	2	1	0	1	0	31250	0	1	200	2	1	4000	150000	400000	1	0	0	1	0	0	3	50000
1	65	7	0	0	1	1	0	0	1	1	0	1	0	41666	1	1	150	2	1	1500	80000	150000	1	0	0	1	0	0	2	25000
0	35	12	0	0	1	1	0	0	1	1	0	1	0	31250	1	1	200	2	1	3000	250000	375000	1	0	0	1	0	0	2	42000
1	60	11	1	0	0	1	0	0	1	1	1	0	0	41666	0	1	200	2	1	2100	160000	252000	1	0	0	0	0	1	2	27000
1	58	13	1	0	0	1	0	0	3	1	0	0	1	50000	0	1	150	2	0	2400	120000	240000	0	1	0	1	0	0	3	40000
1	46	14	1	0	0	1	0	0	8.75	1	0	1	0	41619	0	1	200	2	0	2400	80000	360000	1	0	0	1	0	0	3	35000
1	55	17	1	0	0	0	0	1	2	1	0	0	1	53333	0	1	100	1	0	1200	50000	120000	1	0	0	1	0	0	2	15000
1	18	5	1	0	0	0	0	1	1	0	1	0	0	50000	0	1	150	2	1	1600	80000	160000	1	0	0	1	0	0	2	20000
1	26	19	0	0	1	1	0	0	2	0	1	0	0	50000	0	1	150	2	1	1200	60000	120000	0	1	0	1	0	0	3	50000
1	40	5	0	0	1	1	0	0	8	1	1	0	0	50000	0	1	100	1	0	1500	75000	150000	0	1	0	0	0	1	2	25000
1	22	2	1	0	0	1	0	0	2	1	1	0	0	41666	0	1	100	2	0	3200	100000	384000	1	0	0	1	0	0	2	30000
1	30	1	LO	LO	LO	0	1	0	3	1	1	0	0	31250	0	1	300	2	0	3200	200000	384000	0	1	0	0	0	1	1	20000
1	21	5	1	0	0	1	0	0	1	0	1	0	0	41619	0	1	100	1	0	2800	45000	336000	0	1	0	1	0	0	2	48000
1	35	9	1	0	0	1	0	0	1.5	1	0	1	0	50000	0	1	150	1	0	2400	80000	240000	0	1	0	1	0	0	2	21000
1	30	4	0	0	1	1	0	0	1	1	1	0	0	50000	0	1	150	2	0	4000	150000	400000	0	1	0	1	0	0	2	50000
1	36	12	1	0	0	1	0	0	2	1	1	0	0	50000	0	1	200	2	1	4400	150000	400000	0	1	0	1	0	0	2	50000
1	33	12	1	0	0	1	0	0	3	1	1	0	0	50000	0	1	250	2	0	3200	150000	320000	0	1	0	1	0	0	2	50000
1	45	16	1	0	0	1	0	0	2	1	0	0	1	50000	0	1	200	2	0	3200	240000	384000	1	0	0	1	0	0	3	60000
1	23	2	1	0	0	1	0	0	1.5	1	1	0	0	31250	0	1	200	2	0	1100	100000	132000	1	0	0	1	0	0	1	20000
1	52	23	1	0	0	1	0	0	12	1	1	0	0	31250	0	1	150	2	0	4400	300000	528000	1	0	0	0	0	1	2	20000
1	32	7	0	0	1	1	0	0	1	1	0	1	0	41666	0	1	200	2	0	3600	200000	360000	1	0	0	1	0	0	3	60000
1	30	4	0	0	1	0	0	1	1	1	0	0	1	41666	0	1	200	2	0	3200	60000	320000	1	0	0	1	0	0	2	20000
0	21	4	0	1	0	0	0	1	1	1	1	0	0	41666	0	1	150	2	0	1500	100000	150000	1	0	0	1	0	0	1	15000
1	25	15	0	1	0	1	0	0	1.75	0	1	0	0	31250	0	1	400	2	0	5000	400000	900000	0	1	0	1	0	0	2	30000
1	32	5	1	0	0	0	0	1	1	1	1	0	0	50000	1	1	200	2	0	3200	120000	320000	1	0	0	1	0	0	4	60000
1	41	7	1	0	0	1	0	0	4	1	1	0	0	50000	0	1	200	2	0	4000	150000	400000	1	0	0	0	0	1	1	15000
1	45	15	1	0	0	1	0	0	5	1	1	0	0	50000	0	1	200	2	0	2500	200000	325000	0	1	0	0	0	1	2	25000
1	30	6	1	0	0	1	0	0	3	1	1	0	0	50000	0	1	150	2	0	2000	100000	240000	0	1	0	0	0	1	2	30000
1	47	6	1	0	0	1	0	0	4	1	0	0	1	40000	0	1	200	2	0	4000	160000	400000	0	1	0	1	0	0	2	30000
1	60	4	1	0	0	1	0	0	2.5	1	1	0	0	41666	1	1	200	2	1	3500	130000	350000	1	0	0	0	0	1	2	25000
1	60	12	1	0	0	1	0	0	20	1	1	0	0	50000	1	1	200	2	1	5000	180000	500000	1	0	0	0	0	1	2	22500
1	70	8	1	0	0	1	0	0	1	1	0	1	0	31250	1	1	200	2	1	4500	150000	450000	1	0	0	1	0	0	3	70000
1	55	13	1	0	0	1	0	0	2	1	1	0	0	50000	0	1	250	2	1	4000	200000	400000	0	1	0	1	0	0	3	60000
1	49	11	1	0	0	1	0	0	4	1	1	0	0	50000	0	1	200	2	0	4000	150000	400000	1	0	0	1	0	0	2	25000
1	57	13	1	0	0	1	0	0	2	1	0	0	1	31250	1	1	200	1	1	4100	300000	410000	1	0	0	1	0	0	3	40000
1	25	7	1	0	0	1	0	0	1.5	1	0	0	1	41619	0	1	150	2	1	1200	75000	120000	1	0	0	1	0	0	2	15000
1	35	8	1	0	0	1	0	0	3	1	0	0	1	41619	0	1	300	2	1	5000	300000	500000	1	0	0	1	0	0	3	65000
0	30	7	0	0	1	1	0	0	1	1	0	1	0	41666	1	1	150	2	1	2000	130000	250000	1	0	0	1	0	0	2	25000
0	45	9	0	1	0	1	0	0	1	1	0	1	0	41666	1	1	150	2	1	2500	75000	250000	1	0	0	1	0	0	3	50000
1	35	12	1	0	0	1	0	0	4.5	1	0	1	0	31250	1	1	200	2	1	2800	150000	350000	1	0	0	1	0	0	3	40000
1	39	10	0	0	1	1	0	0	3	1	0	1	0	41666	0	1	200	2	1	4000	200000	400000	1	0	0	1	0	0	3	50000
1	22	6	1	0	0	1	0	0	1	1	1	0	0	41666	0	1	150	2	1	1500	80000	150000	0	0	1	0	1	0	2	20000
0	25	3	0	0	1	1	0	0	1.5	0	1	0	0	31250	0	1	100	2	0	1500	85000	150000	0	0	1	0	1	0	2	30000
1	27	5	1	0	0	1	0	0	1	1	1	0	0	37000	1	1	200	2	1	2800	125000	350000	1	0	0	0	0	1	2	20000
1	21	6	1	0	0	1	0	0	1	1	0	0	1	31250	1	1	100	1	1	1200	100000	150000	1	0	0	1	0	0	2	15000
1	37	20	1	0	0	1	0	0	15	1	0	1	0	41619	0	1	200	2	1	1200	100000	150000	1	0	0	1	0	0	2	20000
1	47	12	0	1	0	1	0	0	10	1	0	0	1	80000	0	1	50	1	0	2200	50000	264000	1	0	0	1	0	0	2	17000
1	47	8	1	0	0	1	0	0	40	1	0	1	0	41666	0	1	150	2	1	2000	100000	200000	1	0	0	1	0	0	2	20000
1	44	19	0	1	0	1	0	0	6	1	0	0	1	41666	0	1	150	2	0	2500	180000	250000	1	0	0	1	0	0	3	30000
1	42	22	1	0	0	1	0	0	10	1	0	0	1	41619	0	1	250	2	0	3000	200000	390000	1	0	0	1	0	0	3	40000
1	28	5	0	1	0	1	0	0	1	1	0	0	1	31250	0	1	200	2	0	3000	150000	300000	1	0	0	1	0	0	3	40000
1	23	2	1	0	0	0	0	1	1	1	0	0	1	31250	0	1	100	1	0	1000	50000	100000	1	0	0	1	0	0	2	25000
1	24	21	1	0	0	1	0	0	3	1	0	0	1	41666	0	1	200	2	1	4000	185000	400000	1	0	0	1	0	0	3	45000
1	67	40	0	1	0	1	0	0	20	1	0	1	0	41666	0	1	100	2	1	1500	80000	150000	1	0	0	1	0	0	2	24000
1	51	31	1	0	0	1	0	0	10	1	0	1	0	37000	0	1	100	1	1	2000	70000	200000	1	0	0	1	0	0	2	15000
1	54	15	1	0	0	1	0	0	4	1	0	0	1	37000	0	1	100	1	1	2000	50000	200000	1	0	0	1	0	0	2	18000
1	50	25	0	1	0	1	0	0	7	1	1	0	0	31250	0	1	100	2	1	1000	80000	130000	1	0	0	1	0	0	2	20000
1	47	10	1	0	0	0	1	0	15	1	0	0	1	31250	0	1	150	1	0	3000	100000	360000	1	0	0	1	0	0	3	30000
1	50	15	0	1	0	1	0	0	5	1	0	0	1	31250	0	1	200	2	0	3000	120000	300000	1	0	0	1	0	0	2	25000
1	48	20	0	1	0	1	0	0	6	1	0	0	1	31250	0	1	150	1	0	4000	180000	400000	1	0	0	1	0	0	2	30000
1	35	7	0	1	0	1	0	0	2	0	1	0	0	31250	0	1	250	3	0	3500	200000	350000	1	0	0	1	0	0	3	50000
1	25	4	1	0	0	0	0	1	1.5	1	0	0	1	31250	0	1	150	2	0	1000	50000	100000	1	0	0	1	0	0	2	25000
1	28	18	1	0	0	1	0	0	3	1	0	0	1	41666	0	1	200	2	1	4000	185000	400000	1	0	0	1	0	0	3	45000
1	65	32	0	1	0	1	0	0	10	1	0	1	0	31250	0	1	100	2	1	1500	80000	150000	1	0	0	1	0	0	2	24000
1	48	24	1	0	0	1	0	0	8	1	0	1	0	31250	0	1	150	2	1	2200	80000	220000	1	0	0	1	0	0	2	18000
1	51	12	1	0	0	1	0	0	3	1	0	0	1	37000	0	1	100	1	1	2000	50000	200000	1	0	0	1	0	0	2	18000
1	50	25	0	1	0	1	0	0	7	1	1	0	0	31250	0	1	100	2	1	1000	80000	130000	1	0	0	1	0	0	2	20000
1	48	8	1	0	0	0	1	0	10	1	0	0	1	41666	0	1	150	1	0	3000	100000	360000	1	0	0	1	0	0	3	30000
1	52	11	0	1	0	1	0	0	4	1	0	0	1	31250	0	1	200	2	0	3200	150000	320000	1	0	0	1	0	0	2	25000
1	48	20	0	1	0	1	0	0	6	1	0	0	1	31250	0	1	150	1	0	4000	180000	400000	1	0	0	1	0	0	2	30000
1	35	7	0	1	0	1	0	0	2	0	1	0	0	31250	0	1	250	3	0	3500	200000	350000	1	0	0	1	0	0	3	50000
1	48	10	0	1	0	1	0	0	8	1	0	0	1	50000	0	1	150	2	0	2500	700000	250000	1	0	0	1	0	0	2	17000
1	44	10	1	0	0	1	0	0	30	1	0	1	0	41666	0	1	200	2	1	2200	120000	220000	1	0	0	1	0	0	2	20000
1	46	21	0	0	1	1	0	0	8	1	0	0	1	31250	0	1	200	2	0	2500	180000	250000	1	0	0	1	0	0	3	30000
1	41	15	1	0	0	1	0	0	12	1	0	0	1	41619	0	1	250	2	0	3000	200000	390000	1	0	0	1	0	0	3	40000
1	29	6	0	1	0	1	0	0	1	1	0	0	1	41666	0	1	200	2	0	3000	150000	300000	1	0	0	1	0	0	3	40000
1	24	3	1	0	0	0	0	1	1	1	0	0	1	31250	0	1	100	1	0	1000	50000	100000	1	0	0	1	0	0	2	25000
1	26	14	1	0	0	1	0	0	2	1	0	0	1	41666	0	1	200	2	1	4000	185000	400000	1	0	0	1	0	0	3	45000
1	68	32	0	1	0	1	0	0	12	1	0	1	0	41666	0	1	100	2	1	1500	80000	150000	1	0	0	1	0	0	2	24000
1	52	24	1	0	0	1	0	0	12	1	0	1	0	37000	0	1	100	1	1	2000	70000	200000	1	0	0	1	0	0	2	15000
1	55	12	1	0	0	1	0	0	3	1	0	0	1	37000	0	1	100	1	1	2000	50000	200000	1	0	0	1	0	0	2	18000
1	51	22	0	1	0	1	0	0	6	1	1	0	0	31250	0	1	100	2	1	1000	80000	130000	1	0	0	1	0	0	2	20000
1	47	10	1	0	0	0	1	0	15	1	0	0	1	31250	0	1	150	1	0	3000	100000	360000	1	0	0	1	0	0	3	30000
1	50	15	0	1	0	1	0	0	5	1	0	0	1	31250	0	1	200	2	0	3000	120000	300000	1	0	0	1	0	0	2	25000
1	49	19	0	1	0	1	0	0	5	1	0	0	1	31250	0	1	150	1	0	4000	180000	400000	1	0	0	1	0	0	2	30000
1	36	8	0	1	0	1	0	0	3	0	1	0	0	31250	0	1	250	3	0	3500	200000	350000	1	0	0	1	0	0	3	50000
1	24	5	1	0	0	0	0	1	1.5	1	0	0	1	31250	0	1	150	2	0	1000	50000	100000	1	0	0	1	0	0	2	25000
1	27	17	1	0	0	1	0	0	4	1	0	0	1	41666	0	1	200	2	1	4000	185000	400000	1	0	0	1	0	0	3	45000
1	64	30	0	1	0	1	0	0	6	1	0	1	0	31250	0	1	100	2	1	1500	80000	150000	1	0	0	1	0	0	2	24000
1	49	25	1	0	0	1	0	0	8	1	0	1	0	31250	0	1	150	2	1	2200	80000	220000	1	0	0	1	0	0	2	18000
1	53	15	1	0	0	1	0	0	4	1	0	0	1	37000	0	1	100	1	1	2000	50000	200000	1	0	0	1	0	0	2	18000
1	48	12	0	1	0	1	0	0	8	1	0	0	1	80000	0	1	50	1	0	2200	50000	264000	1	0	0	1	0	0	2	17000
1	48	8	1	0	0	1	0	0	30	1	0	1	0	41666	0	1	150	2	1	2000	100000	200000	1	0	0	1	0	0	2	20000
1	45	19	0	0	1	1	0	0	6	1	0	0	1	41666	0	1	150	2	0	2500	180000	250000	1	0	0	1	0	0	3	30000
1	43	22	1	0	0	1	0	0	10	1	0	0	1	41619	0	1	250	2	0	3000	200000	390000	1	0	0	1	0	0	3	40000
1	29	7	0	1	0	1	0	0	1	1	0	0	1	31250	0	1	200	2	0	3000	150000	300000	1	0	0	1	0	0	3	40000
1	24	4	1	0	0	0	0	1	2	1	0	0	1	31250	0	1	100	1	0	1000	50000	100000	1	0	0	1	0	0	2	25000
1	25	23	1	0	0	1	0	0	4	1	0	0	1	41666	0	1	200	2	1	4000	185000	400000	1	0	0	1	0	0	3	45000
1	68	36	0	1	0	1	0	0	20	1	0	1	0	41666	0	1	100	2	1	1500	80000	150000	1	0	0	1	0	0	2	24000
1	52	32	1	0	0	1	0	0	10	1	0	1	0	37000	0	1	100	1	1	2000	70000	200000	1	0	0	1	0	0	2	15000
1	55	24	1	0	0	1	0	0	4	1	0	0	1	37000	0	1	100	1	1	2000	50000	200000	1	0	0	1	0	0	2	18000
1	51	20	0	1	0	1	0	0	7	1	1	0	0	31250	0	1	100	2	1	1000	80000	130000	1	0	0	1	0	0	2	20000
1	48	10	1	0	0	0	1	0	15	1	0	0	1	31250	0	1	150	1	0	3000	100000	360000	1	0	0	1	0	0	3	30000
1	51	12	0	1	0	1	0	0	4	1	0	0	1	31250	0	1	200	2	0	3000	120000	300000	1	0	0	1	0	0	2	25000
1	49	16	0	1	0	1	0	0	7	1	0	0	1	31250	0	1	150	1	0	4000	180000	400000	1	0	0	1	0	0	2	30000
1	36	10	0	1	0	1	0	0	2	0	1	0	0	31250	0	1	250	3	0	3500	200000	350000	1	0	0	1	0	0	3	50000
1	26	8	1	0	0	0	0	1	1.5	1	0	0	1	31250	0	1	150	2	0	1000	50000	100000	1	0	0	1	0	0	2	25000
1	29	20	1	0	0	1	0	0	4	1	0	0	1	41666	0	1	200	2	1	4000	185000	400000	1	0	0	1	0	0	3	45000
1	66	30	0	1	0	1	0	0	8	1	0	1	0	31250	0	1	100	2	1	1500	80000	150000	1	0	0	1	0	0	2	24000
1	49	22	1	0	0	1	0	0	7	1	0	1	0	31250	0	1	150	2	1	2200	80000	220000	1	0	0	1	0	0	2	18000
1	52	10	1	0	0	1	0	0	5	1	0	0	1	37000	0	1	100	1	1	2000	50000	200000	1	0	0	1	0	0	2	18000
1	51	21	0	1	0	1	0	0	8	1	1	0	0	31250	0	1	100	2	1	1000	80000	130000	1	0	0	1	0	0	2	20000
1	49	10	1	0	0	0	1	0	10	1	0	0	1	41666	0	1	150	1	0	3000	100000	360000	1	0	0	1	0	0	3	30000
1	53	13	0	1	0	1	0	0	4	1	0	0	1	31250	0	1	200	2	0	3200	150000	320000	1	0	0	1	0	0	2	25000
1	49	22	0	1	0	1	0	0	6	1	0	0	1	31250	0	1	150	1	0	4000	180000	400000	1	0	0	1	0	0	2	30000
1	36	8	0	1	0	1	0	0	2	0	1	0	0	31250	0	1	250	3	0	3500	200000	350000	1	0	0	1	0	0	3	50000
1	49	10	0	1	0	1	0	0	8	1	0	0	1	50000	0	1	150	2	0	2500	700000	250000	1	0	0	1	0	0	2	17000
1	45	12	1	0	0	1	0	0	30	1	0	1	0	41666	0	1	200	2	1	2200	120000	220000	1	0	0	1	0	0	2	20000
1	47	20	0	0	1	1	0	0	8	1	0	0	1	31250	0	1	200	2	1	2500	180000	250000	1	0	0	1	0	0	3	30000
1	42	16	1	0	0	1	0	0	12	1	0	0	1	41619	0	1	250	2	1	3000	200000	390000	1	0	0	1	0	0	3	40000
1	30	8	0	1	0	1	0	0	1	1	0	0	1	41666	0	1	200	2	1	3000	150000	300000	1	0	0	1	0	0	3	40000
1	25	4	1	0	0	0	0	1	1	1	0	0	1	31250	0	1	100	1	1	1000	50000	100000	1	0	0	1	0	0	2	25000
1	27	16	1	0	0	1	0	0	2	1	0	0	1	41666	0	1	200	2	1	4000	185000	400000	1	0	0	1	0	0	3	45000
1	67	28	0	1	0	1	0	0	12	1	0	1	0	41666	0	1	100	2	1	1500	80000	150000	1	0	0	1	0	0	2	24000
1	53	22	1	0	0	1	0	0	10	1	0	1	0	37000	0	1	100	1	1	2000	70000	200000	1	0	0	1	0	0	2	15000
1	56	14	1	0	0	1	0	0	4	1	0	0	1	37000	0	1	100	1	1	2000	50000	200000	1	0	0	1	0	0	2	18000
1	50	21	0	1	0	1	0	0	7	1	1	0	0	31250	0	1	100	2	1	1000	80000	130000	1	0	0	1	0	0	2	20000
1	46	12	1	0	0	0	1	0	14	1	0	0	1	31250	0	1	150	1	0	3000	100000	360000	1	0	0	1	0	0	3	30000
1	30	16	1	0	0	1	0	0	5	1	0	0	1	41666	0	1	200	2	1	4000	185000	400000	1	0	0	1	0	0	3	45000
1	66	30	0	1	0	1	0	0	6	1	0	1	0	31250	0	1	100	2	1	1500	80000	150000	1	0	0	1	0	0	2	24000
1	49	22	1	0	0	1	0	0	5	1	0	1	0	31250	0	1	150	2	1	2200	80000	220000	1	0	0	1	0	0	2	18000
1	52	10	1	0	0	1	0	0	4	1	0	0	1	37000	0	1	100	1	1	2000	50000	200000	1	0	0	1	0	0	2	18000
1	51	21	0	1	0	1	0	0	10	1	1	0	0	31250	0	1	100	2	1	1000	80000	130000	1	0	0	1	0	0	2	20000
1	57	12	1	0	0	1	0	0	3	1	1	0	0	41666	0	1	150	2	0	2500	130000	250000	1	0	0	0	0	1	2	30000
1	42	7	1	0	0	0	1	0	5	1	1	0	0	41666	0	1	200	2	1	3000	150000	300000	1	0	0	0	0	1	2	25000
1	36	6	1	0	0	1	0	0	2	1	1	0	0	31250	0	1	200	2	1	3200	180000	320000	1	0	0	0	0	1	2	25000
1	34	14	0	1	0	1	0	0	2.5	1	1	0	0	50000	1	1	100	1	0	2000	100000	300000	1	0	0	0	0	1	1	15000
1	45	8	0	0	1	1	0	0	5	1	1	0	0	31250	1	1	200	2	1	2400	150000	288000	1	0	0	0	0	1	2	20000
1	32	7	1	0	0	1	0	0	2	1	0	0	1	41666	1	0MIN	150	2	1	3000	180000	360000	1	0	0	1	0	0	4	60000
1	48	10	1	0	0	1	0	0	5	1	1	0	0	31250	1	0MIN	100	2	1	2200	120000	220000	0	0	1	0	1	0	2	28000
1	57	6	0	0	1	1	0	0	3.5	1	1	0	0	31250	0	1	200	2	1	2800	150000	336000	1	0	0	1	0	0	3	35000
1	62	18	1	0	0	1	0	0	2	1	0	0	1	41666	0	1	150	2	0	2000	100000	200000	1	0	0	1	0	0	3	30000
1	57	16	1	0	0	1	0	0	4	1	1	0	0	37000	1	1	200	2	1	3000	180000	360000	1	0	0	1	0	0	3	40000
1	36	9	0	1	0	1	0	0	1	1	1	0	0	31250	1	1	100	1	1	2200	150000	220000	1	0	0	0	0	1	2	30000
1	39	17	0	1	0	0	0	1	1	1	1	0	0	31250	1	1	300	1	1	1500	80000	150000	0	1	0	0	0	1	1	10000
1	45	8	1	0	0	1	0	0	3	1	0	1	0	41666	1	1	200	2	0	2000	100000	200000	0	1	0	1	0	0	3	25000
1	57	12	1	0	0	1	0	0	5	1	0	1	0	50000	1	1	200	2	1	2500	120000	250000	1	0	0	1	0	0	3	35000
0	36	10	0	0	1	1	0	0	1.5	0	1	0	0	31250	0	0MIN	150	2	1	2200	100000	220000	1	0	0	0	0	1	1	12000
1	56	15	1	0	0	1	0	0	4	1	0	0	1	41666	0	1	150	2	0	2000	110000	200000	1	0	0	1	0	0	2	30000
1	41	12	1	0	0	1	0	0	3	1	1	0	0	41666	0	1	150	2	0	2500	130000	250000	1	0	0	0	0	1	2	25000
1	54	21	0	1	0	1	0	0	6	1	0	0	1	31250	1	1	200	2	1	2800	180000	280000	1	0	0	1	0	0	3	40000
1	29	8	1	0	0	1	0	0	2	1	1	0	0	41666	1	0MIN	150	2	1	3000	150000	360000	1	0	0	1	0	0	2	25000
1	58	18	1	0	0	1	0	0	10	1	1	0	0	50000	1	1	250	3	0	3400	200000	408000	1	0	0	1	0	0	2	20000
1	40	13	1	0	0	1	0	0	3	1	1	0	0	41666	1	1	200	2	0	2500	90000	250000	1	0	0	1	0	0	3	30000
1	55	21	1	0	0	1	0	0	5	1	1	0	0	31250	1	1	200	2	1	2600	150000	260000	1	0	0	1	0	0	3	35000
1	62	14	1	0	0	1	0	0	7.5	1	0	0	1	50000	0	1	150	1	1	2400	150000	240000	1	0	0	1	0	0	3	35000
1	57	12	1	0	0	1	0	0	3	1	1	0	0	41666	0	1	200	2	0	2000	110000	200000	1	0	0	0	0	1	2	20000
1	28	20	0	1	0	1	0	0	2	1	0	0	1	31250	1	0MIN	100	2	0	1500	80000	150000	1	0	0	1	0	0	2	18000
0	28	6	0	0	1	0	0	1	1.5	0	1	0	0	31250	1	0	200	1	1	1200	50000	120000	1	0	0	0	0	1	2	30000
1	46	9	1	0	0	1	0	0	4	1	0	0	1	41666	1	1	200	2	0	3000	180000	300000	1	0	0	1	0	0	3	40000
1	45	9	0	0	1	1	0	0	4	1	1	0	0	50000	0	1	200	2	0	2800	160000	280000	1	0	0	0	0	1	2	20000
1	61	18	1	0	0	1	0	0	3	1	1	0	0	41666	0	1	150	2	0	2500	130000	250000	1	0	0	0	0	1	2	30000
1	54	7	1	0	0	1	0	0	5	1	1	0	0	31250	1	0MIN	100	2	1	2000	110000	200000	1	0	0	1	0	0	2	20000
1	57	12	1	0	0	1	0	0	2	1	1	0	0	41666	0	1	150	2	0	2500	130000	250000	1	0	0	0	0	1	2	30000
1	42	7	1	0	0	0	1	0	5	1	1	0	0	41666	0	1	200	2	1	3000	150000	300000	1	0	0	0	0	1	2	25000
1	36	6	1	0	0	1	0	0	3	1	1	0	0	31250	0	1	200	2	1	3200	180000	320000	1	0	0	0	0	1	2	25000
1	34	14	0	1	0	1	0	0	2	1	1	0	0	50000	1	1	100	1	0	2000	100000	300000	1	0	0	0	0	1	1	15000
1	45	8	0	0	1	1	0	0	4	1	1	0	0	31250	1	1	200	2	1	2400	150000	288000	1	0	0	0	0	1	2	20000
1	32	7	1	0	0	1	0	0	3	1	0	0	1	41666	1	0MIN	150	2	1	3000	180000	360000	1	0	0	1	0	0	4	60000
1	48	10	1	0	0	1	0	0	2	1	1	0	0	31250	1	0MIN	100	2	1	2200	120000	220000	0	0	1	0	1	0	2	28000
1	57	6	0	0	1	1	0	0	2.5	1	1	0	0	31250	0	1	200	2	1	2800	150000	336000	1	0	0	1	0	0	3	35000
1	62	18	1	0	0	1	0	0	3	1	0	0	1	41666	0	1	150	2	0	2000	100000	200000	1	0	0	1	0	0	3	30000
1	57	16	1	0	0	1	0	0	5	1	1	0	0	37000	1	1	200	2	1	3000	180000	360000	1	0	0	1	0	0	3	40000
1	36	9	0	1	0	1	0	0	1	1	1	0	0	31250	1	1	100	1	1	2200	150000	220000	1	0	0	0	0	1	2	30000
1	39	17	0	1	0	0	0	1	1	1	1	0	0	31250	1	0	300	1	1	1500	80000	150000	0	1	0	0	0	1	1	10000
1	45	8	1	0	0	1	0	0	3	1	0	1	0	41666	1	1	200	2	0	2000	100000	200000	0	1	0	1	0	0	3	25000
1	57	12	1	0	0	1	0	0	5	1	0	1	0	50000	1	1	200	2	1	2500	120000	250000	1	0	0	1	0	0	3	35000
0	36	10	0	0	1	1	0	0	1.5	0	1	0	0	31250	0	0MIN	150	2	1	2200	100000	220000	1	0	0	0	0	1	1	12000
1	56	15	1	0	0	1	0	0	4	1	0	0	1	41666	0	1	150	2	0	2000	110000	200000	1	0	0	1	0	0	2	30000
1	41	12	1	0	0	1	0	0	3	1	1	0	0	41666	0	1	150	2	0	2500	130000	250000	1	0	0	0	0	1	2	25000
1	54	21	0	1	0	1	0	0	6	1	0	0	1	31250	1	1	200	2	1	2800	180000	280000	1	0	0	1	0	0	3	40000
1	29	8	1	0	0	1	0	0	2	1	1	0	0	41666	1	0MIN	150	2	1	3000	150000	360000	1	0	0	1	0	0	2	25000
1	58	18	1	0	0	1	0	0	10	1	1	0	0	50000	1	1	250	3	0	3400	200000	408000	1	0	0	1	0	0	2	20000
1	40	13	1	0	0	1	0	0	3	1	1	0	0	41666	1	1	200	2	0	2500	90000	250000	1	0	0	1	0	0	3	30000
1	55	21	1	0	0	1	0	0	5	1	1	0	0	31250	1	1	200	2	1	2600	150000	260000	1	0	0	1	0	0	3	35000
1	62	14	1	0	0	1	0	0	7.5	1	0	0	1	50000	0	1	150	1	1	2400	150000	240000	1	0	0	1	0	0	3	35000
1	57	12	1	0	0	1	0	0	3	1	1	0	0	41666	0	1	200	2	0	2000	110000	200000	1	0	0	0	0	1	2	20000
1	28	20	0	1	0	1	0	0	2	1	0	0	1	31250	1	0MIN	100	2	0	1500	80000	150000	1	0	0	1	0	0	2	18000
0	28	6	0	0	1	0	0	1	1.5	0	1	0	0	31250	1	0	200	1	1	1200	50000	120000	1	0	0	0	0	1	2	30000
1	46	9	1	0	0	1	0	0	4	1	0	0	1	41666	1	1	200	2	0	3000	180000	300000	1	0	0	1	0	0	3	40000
1	36	6	1	0	0	1	0	0	3	1	1	0	0	31250	0	1	200	2	1	3200	180000	320000	1	0	0	0	0	1	2	25000
1	34	14	0	1	0	1	0	0	2	1	1	0	0	50000	1	1	100	1	0	2000	100000	300000	1	0	0	0	0	1	1	15000
1	45	8	0	0	1	1	0	0	4	1	1	0	0	31250	1	1	200	2	1	2400	150000	288000	1	0	0	0	0	1	2	20000
1	32	7	1	0	0	1	0	0	3	1	0	0	1	41666	1	0MIN	150	2	1	3000	180000	360000	1	0	0	1	0	0	4	60000
1	48	10	1	0	0	1	0	0	2	1	1	0	0	31250	1	0MIN	100	2	1	2200	120000	220000	0	0	1	0	1	0	2	28000
1	57	6	0	0	1	1	0	0	2.5	1	1	0	0	31250	0	1	200	2	1	2800	150000	336000	1	0	0	1	0	0	3	35000
1	62	18	1	0	0	1	0	0	3	1	0	0	1	41666	0	1	150	2	0	2000	100000	200000	1	0	0	1	0	0	3	30000
1	57	16	1	0	0	1	0	0	5	1	1	0	0	37000	1	1	200	2	1	3000	180000	360000	1	0	0	1	0	0	3	40000
1	36	9	0	1	0	1	0	0	1	1	1	0	0	31250	1	1	100	1	1	2200	150000	220000	1	0	0	0	0	1	2	30000
1	39	17	0	1	0	0	0	1	1	1	1	0	0	31250	1	0	300	1	1	1500	80000	150000	0	1	0	0	0	1	1	10000
1	45	8	1	0	0	1	0	0	3	1	0	1	0	41666	1	1	200	2	0	2000	100000	200000	0	1	0	1	0	0	3	25000
1	58	12	1	0	0	1	0	0	5	1	0	1	0	50000	1	1	200	2	1	2500	120000	250000	1	0	0	1	0	0	3	35000
0	38	10	0	0	1	1	0	0	1.5	0	1	0	0	31250	0	0MIN	150	2	1	2200	100000	220000	1	0	0	0	0	1	1	12000
1	57	15	1	0	0	1	0	0	4	1	0	0	1	41666	0	1	150	2	0	2000	110000	200000	1	0	0	1	0	0	2	30000
1	42	12	1	0	0	1	0	0	3	1	1	0	0	41666	0	1	150	2	0	2500	130000	250000	1	0	0	0	0	1	2	25000
1	55	21	0	1	0	1	0	0	6	1	0	0	1	31250	1	1	200	2	1	2800	180000	280000	1	0	0	1	0	0	3	40000
1	28	8	1	0	0	1	0	0	2	1	1	0	0	41666	1	0MIN	150	2	1	3000	150000	360000	1	0	0	1	0	0	2	25000
1	59	18	1	0	0	1	0	0	10	1	1	0	0	50000	1	1	250	3	0	3400	200000	408000	1	0	0	1	0	0	2	20000
1	42	13	1	0	0	1	0	0	3	1	1	0	0	41666	1	1	200	2	0	2500	90000	250000	1	0	0	1	0	0	3	30000
1	52	21	1	0	0	1	0	0	5	1	1	0	0	31250	1	1	200	2	1	2600	150000	260000	1	0	0	1	0	0	3	35000
1	65	14	1	0	0	1	0	0	7.5	1	0	0	1	50000	0	1	150	1	1	2400	150000	240000	1	0	0	1	0	0	3	35000
1	56	12	1	0	0	1	0	0	3	1	1	0	0	41666	0	1	200	2	0	2000	110000	200000	1	0	0	0	0	1	2	20000
1	28	20	0	1	0	1	0	0	2	1	0	0	1	31250	1	0MIN	100	2	0	1500	80000	150000	1	0	0	1	0	0	2	18000
0	30	6	0	0	1	0	0	1	1.5	0	1	0	0	31250	1	0	200	1	1	1200	50000	120000	1	0	0	0	0	1	2	30000
1	46	9	1	0	0	1	0	0	4	1	0	0	1	41666	1	1	200	2	0	3000	180000	300000	1	0	0	1	0	0	3	40000
1	48	14	1	0	0	1	0	0	3	1	0	0	1	31250	1	1	150	2	0	2800	150000	280000	1	0	0	1	0	0	2	40000

## Sheet: Feuil1
ARRONDISSEMENT	PROD	SEXE	AGE	NIV EDUC	STATUT MAT	NBRE MEMBRE	ACQUISI TERRES	BUT PRODUCTION	ANNEE EXPE	Suptotal (ha)	Supmais (ha)	SYSTÈME CULTURE	RAISON DU SYSTÈME	PREPARATION SOL	DENSITE SEMIS	DISTANCE INTER RANG (Cm)	DISTANCE INTRA RANG (Cm)	VARIETE	FERTILISATION	EXPLE FERTI-NPK	EXPLE FERTI-UREE	EXPLE FERTI-BOURSE DE VACHE	QUANTITE (Kg)	FREQUENCE	CONTRAINTE PROD-FER	CONTRAINTE PROD-ADV	CONTRAINTE PROD-RAV	CONTRAINTE PROD-FIN	CONTRAINTE PROD-SEM	CONTRAINTE PROD-MEC	CONTRAINTE PROD-MAR	CONTRAINTE PROD-HYD	GESTION FERTILITE	SOUTIEN NECESSAIRE	RENDEMENT (Kg/ha)	DEPENSE/Ha (FCFA)	GAIN/Ha	LIEU VENTE	FAMILLE PRINCIPALE-GRA	FAMILLE PRINCIPALE-FAB	FAMILLE PRINCIPALE-CYP	FAMILLE PRINCIPALE-AUT	METHODE LUTTE	TYPE	FREQUENCE	COUT	EFFICACITE	CONT GEST ADV-CEH	CONT GEST ADV-RAD
MBE	1	M	32	SEC	MA	12	HE	COVE	15	5	3	CUPU	BR	LAB	50000	80	25	TRA	CHI	OUI	OUI	NON	100	2	OUI	OUI	OUI	OUI	NON	NON	NON	NON	ROT	IN	3000	300000	750000	MARCHE	OUI	OUI	OUI	NON	HER	NSS	3	60000	TE	OUI	OUI
MBE	2	M	51	SEC	MA	9	HE	COVE	20	10	4	CUPU	MC	LS	47620	70	30	TRA	CHI	OUI	OUI	NON	100	2	OUI	OUI	NON	NON	NON	NON	NON	NON	EC	FTIN	1400	100000	168000	MARCHE	OUI	OUI	OUI	NON	HER	NSS	2	30000	ME	OUI	NON
MBE	3	M	42	SEC	MA	5	HE	COVE	20	3	1.5	CUPU	ML	LAB	47620	70	30	TRA	CHI	OUI	OUI	NON	100	2	OUI	OUI	NON	NON	NON	NON	NON	NON	EC	FTIN	1700	100000	204000	MARCHE	OUI	OUI	OUI	NON	HER	NSS	3	50000	ME	OUI	NON
MBE	4	M	47	SEC	MA	15	HE	COVE	10	12	8	CUPU	MC	LS	50000	80	25	AME	CHI	OUI	NON	NON	50	1	OUI	OUI	OUI	NON	NON	NON	NON	NON	EC	FTIN	2500	250000	312500	MARCHE	OUI	OUI	OUI	NON	HER	NSS	3	80000	TE	OUI	NON
MBE	5	M	28	SEC	CE	1	HE	COVE	4	4	1	CUPU	ML	LAB	50000	80	25	TRA	CHI	OUI	NON	NON	50	2	NON	OUI	OUI	NON	NON	NON	NON	NON	AUT	AUT	2700	130000	351000	MARCHE	OUI	OUI	OUI	NON	DMHE	NSS	3	25000	ME	OUI	OUI
MBE	6	M	45	SEC	MA	10	HE	COVE	15	15	10	CUPU	ML	SD	50000	80	25	TRA	CHI	OUI	OUI	NON	100	2	NON	OUI	NON	NON	NON	NON	NON	NON	ROT	FTIN	1400	200000	210000	MARCHE	OUI	NON	NON	OUI	HER	NSS	3	25000	RE	OUI	OUI
MBE	7	M	46	SEC	MA	10	DO	COVE	3	5	5	CUPU	ML	SD	25000	80	50	TRA	CHI	OUI	NON	NON	100	2	OUI	OUI	NON	NON	NON	NON	NON	NON	JA	FTIN	2500	100000	250000	MARCHE	OUI	OUI	OUI	NON	HER	NSS	2	25000	EF	NON	OUI
MBE	8	M	51	SEC	MA	11	DO	VE	10	3.5	2	CUPU	ML	SD	41666	80	30	TRA	CHI	OUI	OUI	NON	100	2	NON	OUI	OUI	NON	NON	NON	NON	NON	AUT	IN	1500	200000	240000	MARCHE	OUI	OUI	OUI	NON	HER	NSS	3	35000	TE	OUI	NON
MBE	9	M	44	PRI	MA	9	HE	COVE	4	2	1.5	CUPU	MC	LS	31250	80	40	TRA	CHI	OUI	OUI	NON	100	2	NON	OUI	OUI	NON	NON	NON	NON	NON	AUT	IN	2000	100000	200000	MARCHE	OUI	OUI	OUI	NON	HER	NSS	2	15000	TE	OUI	NON
MBE	10	F	34	PRI	CE	6	AC	COVE	4	1.5	1.5	CUPU	BR	LAB	31250	80	40	TRA	CHI	OUI	OUI	NON	100	2	NON	OUI	NON	NON	OUI	OUI	NON	NON	EC	FTIN	2000	150000	200000	MARCHE	OUI	OUI	OUI	NON	HER	NSS	2	15000	EF	OUI	OUI
MBE	11	M	47	PRI	MA	12	AC	CO	5	2	2	ASSO	DI	LAB	41666	80	30	TRA	CHI	OUI	NON	NON	100	2	NON	OUI	OUI	OUI	OUI	NON	NON	NON	EC	FTIN	2000	120000	240000		OUI	NON	OUI	OUI	HER	NSS	2	20000	EF	OUI	OUI
MBE	12	M	39	SEC	MA	5	HE	CO	13	6	6	ASSO	DI	LAB	31250	80	40	TRA	CHI	OUI	NON	NON	100	2	NON	OUI	OUI	OUI	OUI	NON	NON	NON	EC	IN	1000	100000	12000		NON	OUI	NON	OUI	HER	NSS	2	20000	EF	OUI	OUI
MBE	13	F	29	SEC	MA	7	HE	COVE	3	2	1	CUPU	MC	SD	31250	80	40	TRA	CHI	OUI	NON	NON	100	2	NON	OUI	OUI	OUI	OUI	NON	NON	NON	EC	FTIN	2500	70000	250000	MARCHE	OUI	OUI	NON	NON	DMHE	NSS	3	35000	EF	OUI	OUI
MBE	14	F	60	PRI	CE	4	HE	CO	20	1.5	1	CUPU	MC	SD	31250	80	40	TRA	ORG	NPK	NON	OUI	400	1	OUI	OUI	NON	NON	NON	NON	NON	NON	AUT	IN	1000	25000	10000		OUI	OUI	OUI	NON	DM	HOUES	2		EF	NON	NON
MBE	15	F	50	PRI	CE	6	DO	CO	5	1	1	CUPU	ML	SD	37000	90	30	TRA	CHI	OUI	NON	NON	50	1	NON	OUI	OUI	NON	NON	NON	NON	NON	ROT	IN	2000	70000	260000		OUI	OUI	OUI	NON	HER	NSS	3	30000	ME	NON	OUI
MBE	16	M	57	PRI	MA	14	DO	COVE	35	25	15	CUPU	BR	LS	25000	80	50	TRA	CHI	OUI	OUI	NON	200	2	NON	OUI	OUI	NON	NON	NON	NON	NON	AUT	IN	2500	100000	250000	MARCHE	OUI	NON	OUI	OUI	DMHE	NSS	2	25000	EF	NON	OUI
MBE	17	M	34	SEC	MA	4	DO	CO	1	2	1	CUPU	MC	SD	66666	50	30	TRA	CHI	OUI	NON	NON	50	1	NON	OUI	OUI	NON	NON	NON	NON	NON	ROT	AUT	2000	70000	200000		OUI	OUI	NON	OUI	HER	NSS	2	30000	EF	OUI	OUI
MBE	18	M	53	PRI	MA	20	HE	COVE	40	7.5	3	CUPU	BR	LS	41666	80	30	AME	CHI	OUI	OUI	NON	100	2	OUI	OUI	NON	NON	NON	NON	NON	NON	EC	FTIN	2200	100000	220000	MARCHE	OUI	OUI	OUI	NON	HER	NSS	3	50000	TE	OUI	NON
MBE	19	M	50	SEC	MA	12	HE	COVE	15	3	1.75	CUPU	BR	LS	57142	70	25	AME	CHI	OUI	OUI	NON	100	2	OUI	OUI	NON	NON	NON	NON	NON	NON	EC	FTIN	3400	100000	340000	MARCHE	OUI	OUI	OUI	NON	HER	NSS	2	25000	EF	OUI	NON
MBE	20	M	36	SEC	CE	12	AC	COVE	5	6	6	CUPU	ML	LS	31250	80	40	TRA	CHI	OUI	OUI	NON	100	2	NON	OUI	OUI	NON	NON	NON	NON	NON	EC	FI	2000	100000	200000	MARCHE	OUI	OUI	NON	OUI	HER	NSS	3	35000	EF	OUI	OUI
MBE	21	M	45	PRI	MA	9	DO	CO	10	1.5	1.5	CUPU	MC	LAB	50000	80	25	TRA	CHI	OUI	NON	NON	50	1	NON	OUI	OUI	NON	OUI	NON	NON	NON	EC	FI	2000	50000	200000		OUI	OUI	OUI	NON	HER	NSS	2	15000	EF	OUI	OUI
MBE	22	M	38	SEC	MA	7	DO	COVE	2	2	2	CUPU	ML	SD	31250	80	40	TRA	CHI	OUI	OUI	NON	100	2	NON	OUI	OUI	NON	OUI	OUI	NON	NON	ROT	AUT	4000	200000	480000	MARCHE	OUI	OUI	OUI	NON	HER	NSS	3	75000	EF	OUI	OUI
MBE	23	M	43	SEC	MA	9	AC	COVE	25	3	1	CUPU	BR	LS	40000	50	50	TRA	CHI	OUI	OUI	NON	100	2	NON	OUI	OUI	NON	NON	NON	NON	NON	AUT	IN	3000	200000	375000	MARCHE	OUI	OUI	OUI	OUI	HER	NSS	3	35000	ME	OUI	OUI
MBE	24	M	49	SEC	MA	10	HE	COVE	25	8	4	CUPU	BR	LS	50000	80	25	TRA	CHI	OUI	OUI	NON	100	2	NON	OUI	OUI	NON	NON	NON	NON	NON	ROT	AUT	3500	220000	455000	MARCHE	OUI	OUI	OUI	OUI	HER	NSS	3	45000	ME	OUI	OUI
MBE	25	F	26	SEC	MA	4	LO	CO	1	1.5	1	CUPU	MC	SD	41666	80	30	TRA	CHI	OUI	OUI	NON	100	2	NON	OUI	OUI	NON	NON	NON	NON	NON	EC	IN	2800	60000	280000		OUI	OUI	OUI	NON	HER	NSS	3	25000	ME	OUI	NON
MBE	26	M	34	SEC	CE	1	HE	COVE	12	1.5	1.5	CUPU	ML	LAB	50000	80	25	TRA	CHI	OUI	OUI	NON	100	2	NON	OUI	OUI	NON	NON	NON	NON	NON	ROT	IN	2800	120000	420000	MARCHE	OUI	OUI	OUI	NON	DMHE	NSS	2	18000	TE	OUI	NON
MBE	27	M	47	SEC	CE	9	HE	COVE	20	8	4	ASSO	DI	LS	31250	80	40	TRA	CHI	OUI	OUI	NON	200	2	OUI	OUI	OUI	NON	NON	NON	NON	NON	AUT	IN	3000	180000	300000	SUR PLACE	OUI	OUI	NON	OUI	DMHE	NSS	3	25000	ME	NON	OUI
MBE	28	M	45	PRI	MA	10	LO	COVE	15	3	1	CUPU	MC	SD	31250	80	40	TRA	CHI	OUI	OUI	NON	200	3	NON	OUI	OUI	NON	NON	NON	NON	NON	ROT	IN	2000	200000	300000	MARCHE	OUI	OUI	NON	NON	HER	NSS	2	30000	TE	OUI	NON
MBE	29	M	45	SEC	MA	5	HE	COVE	4	7.5	1.5	CUPU	ML	SD	50000	80	25	TRA	CHI	OUI	OUI	NON	100	2	NON	OUI	NON	NON	NON	NON	NON	NON	EC	IN	3000	100000	510000	MARCHE	OUI	OUI	OUI	NON	HER	NSS	3	45000	TE	OUI	NON
MBE	30	M	49	PRI	MA	15	HE	COVE	35	3	2	CUPU	ML	SD	50000	80	25	TRA	CHI	OUI	OUI	NON	200	2	NON	OUI	OUI	NON	NON	OUI	OUI	NON	AO	AUT	2600	80000	260000	MARCHE	OUI	NON	NON	OUI	HER	NSS	2	25000	EF	OUI	OUI
MBE	31	F	28	PRI	MA	7	AC	COVE	5	2.5	1.5	CUPU	MC	LS	50000	80	25	TRA	ORG	NON	NON	OUI	200	1	NON	OUI	OUI	NON	NON	NON	NON	NON	AUT	FTIN	1500	40000	150000		OUI	OUI	OUI	NON	HER	NSS	3	25000	EF	OUI	OUI
MBE	32	M	52	PFO	MA	10	DO	COVE	8	3	1.5	CUPU	ML	SD	31250	80	40	AME	CHI	OUI	OUI	NON	300	2	NON	OUI	OUI	NON	NON	NON	NON	NON	ROT	IN	2400	80000	240000	MARCHE	OUI	OUI	OUI	NON	HER	SE	3	20000	TE	OUI	NON
MBE	33	M	41	SEC	MA	15	HE	COVE	10	7	3.5	CUPU	ML	LS	41666	80	30	TRA	CHI	NON	OUI	NON	100	1	OUI	OUI	OUI	NON	NON	NON	NON	NON	ROT	FTIN	3400	110000	544000	MARCHE	OUI	OUI	OUI	NON	DMHE	NSS	3	30000	EF	OUI	OUI
MBE	34	M	42	PRI	MA	11	AC	CO	3	2	1.5	CUPU	MC	LAB	66666	60	25	TRA	CHI	OUI	NON	NON	100	1	NON	OUI	OUI	NON	NON	NON	NON	NON	EC	IN	3000	120000	375000		OUI	OUI	OUI	NON	HER	NSS	2	60000	EF	NON	OUI
MBE	35	M	43	SEC	MA	6	HE	COVE	10	1	1	CUPU	BR	LAB	50000	80	25	AME	CHI	OUI	NON	NON	200	2	NON	OUI	OUI	NON	NON	NON	NON	NON	AO	FTIN	4000	100000	500000	MARCHE	OUI	OUI	OUI	NON	DMHE	NSS	1	40000	EF	OUI	OUI
MBE	36	M	25	SEC	CE	10	AC	CO	4	1	1	CUPU	ML	LS	41666	80	30	TRA	CHI	OUI	OUI	NON	100	2	NON	OUI	OUI	NON	NON	NON	NON	NON	EC	FTIN	3500	200000	350000		OUI	OUI	NON	NON	HER	NSS	4	60000	TE	OUI	NON
MBE	37	F	60	PRI	MA	9	HE	CO	15	5	2	CUPU	MC	LAB	47619	70	30	TRA	ORG	NON	NON	OUI	100	1	NON	OUI	NON	NON	NON	NON	NON	NON	ROT	FTIN	1000	15000	100000		OUI	OUI	OUI	NON	DM	HOUES	3		EF	NON	OUI
MBE	38	M	44	PRI	MA	10	DO	COVE	6	5	2	CUPU	BR	LAB	37000	90	30	TRA	CHI	OUI	OUI	NON	100	1	NON	OUI	OUI	NON	OUI	NON	NON	NON	AUT	AUT	2600	100000	260000		NON	NON	NON	OUI	DMHE	NSS	2	30000	TE	OUI	OUI
MBE	39	F	22	PRI	CE	9	HE	COVE	9	3	3	CUPU	ML	SD	25000	80	50	TRA	CHI	OUI	OUI	NON	200	2	OUI	OUI	OUI	NON	NON	NON	NON	NON	JA	IN	3000	120000	360000	MARCHE	OUI	OUI	NON	NON	HER	NSS	2	40000	ME	OUI	NON
MBE	40	F	37	PRI	MA	7	HE	COVE	20	2	1	ASSO	DI	LAB	25000	80	50	AME	CHI	OUI	OUI	NON	100	2	OUI	OUI	OUI	NON	NON	NON	NON	NON	AUT	IN	1300	100000	130000	SUR PLACE	OUI	NON	OUI	NON	DM	HOUES	2		ME	NON	NON
MBE	41	M	43	SEC	CE	10	DO	COVE	28	10	4	CUPU	BR	LAB	66666	50	30	TRA	CHI	OUI	OUI	NON	150	2	NON	OUI	OUI	OUI	OUI	NON	NON	NON	EC	FTIN	2000	150000	350000	MARCHE	OUI	OUI	NON	NON	HER	NSS	2	25000	EF	OUI	OUI
MBE	42	M	47	PRI	CE	12	AC	CO	30	5	5	CUPU	BR	SD	31250	80	40	TRA	CHI	OUI	OUI	NON	200	2	NON	OUI	NON	OUI	OUI	NON	NON	NON	EC	FTIN	3000	100000	300000		NON	NON	NON	OUI	HER	NSS	2	20000	EF	OUI	OUI
MBE	43	F	66	PRI	MA	11	HE	COVE	15	2	1.5	CUPU	ML	LAB	25000	80	50	TRA	CHI	OUI	OUI	NON	100	1	OUI	OUI	OUI	NON	NON	NON	NON	NON	JA	IN	1500	50000	150000		OUI	NON	OUI	NON	DM	HOUES	2		EF	NON	NON
MBE	44	F	41	SEC	CE	3	HE	COVE	25	1.5	1	CUPU	BR	SD	31250	80	40	TRA	CHI	OUI	OUI	NON	150	2	OUI	OUI	OUI	NON	NON	NON	NON	NON	EC	AUT	2800	200000	364000	MARCHE	NON	NON	NON	OUI	DMHE	NSS	2	25000	EF	OUI	OUI
MBE	45	M	68	PRI	MA	10	DO	COVE	9	5	3	CUPU	BR	LAB	25000	80	50	TRA	CHI	OUI	OUI	NON	200	2	NON	NON	OUI	NON	NON	NON	NON	NON	EC	FTIN	4000	150000	480000	MARCHE	NON	NON	NON	OUI	DMHE	NSS	2	30000	ME	OUI	OUI
MBE	46	M	36	SEC	MA	11	DO	COVE	4	3	1	CUPU	BR	LAB	31250	80	40	TRA	CHI	OUI	OUI	NON	100	1	NON	OUI	OUI	NON	NON	OUI	OUI	NON	ROT	AUT	3500	100000	350000	MARCHE	OUI	OUI	OUI	NON	HER	NSS	1	40000	EF	OUI	OUI
MBE	47	M	45	SEC	MA	9	HE	COVE	4	1	1	CUPU	BR	LAB	41666	80	30	TRA	CHI	OUI	OUI	NON	100	1	NON	OUI	NON	OUI	NON	NON	NON	NON	EC	AUT	1300	35000	130000	MARCHE	NON	OUI	NON	NON	HER	NSS	2	20000	EF	OUI	OUI
MBE	48	M	57	SEC	MA	8	DO	COVE	15	5	3	CUPU	BR	LS	31250	80	40	AME	CHI	OUI	OUI	NON	200	2	OUI	OUI	NON	NON	NON	NON	NON	NON	ROT	FTIN	3000	120000	300000	MARCHE	NON	NON	NON	OUI	DMHE	NSS	2	25000	ME	OUI	OUI
MBE	49	M	21	PRI	CE	8	HE	COVE	10	3	3	CUPU	BR	LAB	41666	80	30	TRA	CHI	OUI	NON	NON	100	1	OUI	OUI	NON	NON	NON	NON	NON	NON	JA	IN	2000	100000	250000	MARCHE	NON	NON	NON	OUI	HER	SE	2	20000	EF	NON	OUI
MBE	50	M	47	PRI	MA	13	HE	COVE	10	3	2	CUPU	BR	SD	31250	80	40	TRA	CHI	OUI	NON	NON	100	1	OUI	OUI	NON	NON	NON	NON	NON	NON	EC	FTIN	1700	150000	212500	MARCHE	OUI	OUI	NON	NON	HER	NSS	2	24000	EF	OUI	NON
MBE	51	M	26	SEC	CE	6	HE	COVE	8	2	1	CUPU	BR	LAB	25000	80	50	AME	CHI	OUI	NON	NON	100	2	OUI	OUI	NON	NON	NON	NON	NON	NON	JA	IN	1600	100000	200000	MARCHE	OUI	NON	NON	NON	HER	NSS	2	20000	EF	OUI	NON
MBE	52	M	27	SEC	CE	8	HE	COVE	7	1.5	1	CUPU	BR	LAB	25000	80	50	TRA	CHI	OUI	NON	NON	100	2	OUI	OUI	NON	NON	NON	NON	NON	NON	EC	FTIN	2700	150000	324000	MARCHE	OUI	NON	NON	NON	DMHE	SE	2	94000	TE	OUI	NON
MBE	53	M	22	SUP	CE	6	HE	COVE	5	1	1	CUPU	BR	LAB	25000	80	50	TRA	CHI	OUI	NON	NON	200	2	OUI	OUI	NON	NON	NON	NON	NON	NON	EC	IN	2900	95000	348000	MARCHE	OUI	OUI	NON	NON	HER	SE	2	25000	EF	OUI	NON
MBE	54	M	20	SEC	CE	7	HE	COVE	5	7.5	2.5	CUPU	BR	LAB	31250	80	40	AME	CHI	OUI	OUI	NON	200	2	OUI	OUI	NON	NON	NON	NON	NON	NON	EC	FTIN	4500	250000	540000	MARCHE	OUI	OUI	NON	NON	HER	SE	2	30000	EF	OUI	NON
MBE	55	M	54	SEC	MA	18	HE	COVE	30	12	6	CUPU	BR	LAB	31250	80	40	TRA	CHI	OUI	OUI	NON	150	2	OUI	OUI	OUI	NON	NON	NON	NON	NON	EC	FTIN	1200	80000	150000	MARCHE	OUI	OUI	NON	OUI	HER	SE	2	25000	EF	OUI	NON
MBE	56	M	28	SUP	CE	10	DO	COVE	1	2.5	1.5	CUPU	BR	LAB	31250	80	40	AME	CHI	OUI	NON	NON	100	1	OUI	OUI	NON	NON	NON	NON	NON	NON	EC	IN	3000	120000	300000	MARCHE	OUI	OUI	OUI	NON	HER	SE	2	30000	EF	OUI	NON
MBE	57	M	42	PRI	MA	17	AC	COVE	5	3.5	2	CUPU	BR	LAB	37000	90	30	AME	CHI	OUI	OUI	NON	200	2	OUI	OUI	NON	NON	NON	NON	NON	NON	AUT	FTIN	2800	120000	280000	MARCHE	OUI	OUI	NON	NON	HER	SE	1	12000	EF	OUI	NON
MBE	58	M	43	PRI	MA	8	AC	COVE	6	2	1	CUPU	BR	SD	37000	90	30	AME	CHI	OUI	NON	NON	100	1	OUI	OUI	NON	NON	NON	NON	NON	NON	EC	FTIN	1000	34000	100000	MARCHE	OUI	OUI	NON	NON	HER	NSS	2	22000	EF	OUI	NON
MBE	59	F	40	PRI	MA	4	HE	COVE	2	1	1	CUPU	ML	SD	25000	80	50	AME	CHI	OUI	NON	NON	100	1	OUI	OUI	OUI	NON	NON	NON	NON	NON	EC	IN	1300	75000	130000	MARCHE	OUI	OUI	NON	OUI	HER	NSS	2	10500	EF	OUI	NON
MBE	60	M	37	SEC	CE	2	HE	COVE	10	17	3	CUPU	BR	LS	41666	80	30	TRA	CHI	OUI	OUI	NON	100	1	NON	OUI	NON	NON	NON	OUI	NON	NON	ROT	IN	2000	205000	500000	MARCHE	OUI	OUI	OUI	NON	HER	NSS	3	40000	EF	OUI	OUI
MBE	61	M	42	SEC	MA	15	HE	COVE	5	12.5	4.5	CUPU	BR	LS	31250	80	40	TRA	CHI	OUI	OUI	NON	100	1	NON	OUI	OUI	NON	NON	OUI	OUI	NON	EC	AUT	2500	250000	500000	MARCHE	NON	NON	NON	OUI	HER	NSS	2	25000	EF	OUI	OUI
MBE	62	M	46	SEC	MA	10	HE	COVE	10	25	20	CUPU	BR	SD	31250	80	40	TRA	CHI	OUI	NON	NON	100	1	NON	OUI	NON	NON	NON	OUI	NON	NON	ROT	IN	2000	75000	200000	MARCHE	NON	NON	NON	OUI	HER	NSS	2	20000	EF	OUI	OUI
MBE	63	M	42	SEC	MA	8	HE	COVE	12	6	3	CUPU	BR	SD	41666	80	30	TRA	CHI	OUI	OUI	NON	150	2	OUI	OUI	NON	NON	NON	NON	NON	NON	ROT	AUT	2500	90000	250000	MARCHE	NON	NON	NON	OUI	HER	NSS	2	25000	EF	NON	OUI
MBE	64	F	39	PRI	MA	10	DO	COVE	15	2	1	CUPU	ML	LAB	31250	80	40	TRA	CHI	OUI	OUI	NON	100	1	OUI	OUI	NON	NON	NON	NON	NON	NON	ROT	IN	2400	100000	240000	MARCHE	OUI	OUI	OUI	NON	HER	SE	2	20000	ME	NON	OUI
MBE	65	M	53	SEC	MA	14	HE	COVE	20	7	4	CUPU	BR	LS	41666	80	30	TRA	CHI	OUI	OUI	NON	200	2	NON	OUI	NON	NON	NON	OUI	NON	NON	AUT	AUT	3000	150000	360000	MARCHE	OUI	OUI	NON	NON	DMHE	NSS	3	40000	EF	OUI	OUI
MBE	66	M	44	SEC	MA	9	HE	COVE	15	4	3	CUPU	BR	SD	37000	90	30	TRA	CHI	OUI	OUI	NON	200	2	OUI	OUI	NON	NON	NON	NON	NON	NON	ROT	IN	3400	180000	400000	MARCHE	OUI	OUI	OUI	NON	DMHE	NSS	3	50000	TE	OUI	OUI
MBE	67	M	48	SEC	MA	11	HE	COVE	20	5	2	CUPU	BR	LAB	41666	80	30	AME	CHI	OUI	OUI	NON	150	2	OUI	OUI	NON	NON	NON	NON	NON	NON	AUT	IN	2400	120000	280000	MARCHE	OUI	OUI	NON	NON	HER	NSS	3	40000	TE	OUI	OUI
MBE	68	M	54	PRI	MA	8	HE	COVE	25	10	5	CUPU	BR	LS	25000	80	50	TRA	CHI	OUI	OUI	NON	200	2	NON	OUI	NON	NON	NON	NON	NON	NON	ROT	FTIN	3000	200000	360000	MARCHE	OUI	OUI	NON	NON	DMHE	NSS	2	35000	EF	OUI	OUI
MBE	69	M	56	SEC	MA	7	DO	COVE	30	4	3	CUPU	BR	SD	31250	80	40	TRA	CHI	OUI	OUI	NON	150	2	OUI	OUI	NON	NON	NON	NON	NON	NON	AUT	IN	2800	130000	280000	MARCHE	OUI	OUI	NON	NON	HER	NSS	3	30000	EF	OUI	OUI
MBE	70	F	42	SEC	MA	12	DO	CO	12	3	1.5	CUPU	ML	LAB	25000	80	50	TRA	CHI	OUI	OUI	NON	100	1	NON	OUI	OUI	NON	OUI	NON	NON	NON	ROT	IN	2000	100000	200000		OUI	NON	NON	NON	HER	SE	2	25000	EF	NON	OUI
MBE	71	M	32	SEC	CE	6	HE	VE	7	2	2	CUPU	BR	LAB	41666	80	30	AME	CHI	OUI	OUI	NON	200	2	OUI	OUI	OUI	NON	NON	NON	NON	NON	AUT	IN	2500	120000	312500	MARCHE	OUI	OUI	OUI	NON	HER	SE	2	30000	EF	OUI	OUI
MBE	72	M	51	SEC	MA	9	HE	COVE	10	5	2.5	CUPU	BR	SD	31250	80	40	TRA	CHI	OUI	OUI	NON	150	2	OUI	OUI	NON	NON	NON	OUI	NON	NON	ROT	FTIN	2000	100000	240000	MARCHE	OUI	OUI	NON	NON	HER	NSS	3	40000	TE	OUI	OUI
MBE	73	M	45	PRI	MA	13	DO	COVE	20	7	4	CUPU	BR	LAB	37000	90	30	TRA	CHI	OUI	OUI	NON	200	2	OUI	OUI	NON	NON	NON	NON	NON	NON	AUT	IN	3000	180000	360000	MARCHE	OUI	OUI	NON	OUI	HER	SE	2	25000	EF	NON	OUI
MBE	74	M	56	SEC	MA	16	HE	COVE	30	12	5	CUPU	BR	LAB	25000	80	50	TRA	CHI	OUI	OUI	NON	100	1	OUI	OUI	OUI	NON	NON	NON	NON	NON	EC	IN	2800	140000	280000	MARCHE	OUI	OUI	OUI	NON	DMHE	NSS	2	30000	ME	NON	OUI
MBE	75	M	28	SEC	CE	8	HE	COVE	5	2	1	CUPU	ML	LAB	31250	80	40	TRA	CHI	OUI	OUI	NON	100	1	NON	OUI	OUI	NON	NON	NON	NON	NON	EC	FTIN	2400	100000	240000	MARCHE	OUI	OUI	OUI	NON	HER	SE	2	20000	EF	OUI	OUI
MBE	76	M	37	SEC	MA	7	HE	COVE	12	3	3	CUPU	BR	LAB	31250	80	40	TRA	CHI	OUI	OUI	NON	150	2	NON	OUI	NON	NON	OUI	NON	NON	NON	EC	IN	2000	120000	240000	MARCHE	OUI	OUI	NON	NON	HER	SE	2	25000	EF	OUI	OUI
MBE	77	M	43	SEC	MA	9	DO	COVE	15	4	2	CUPU	BR	SD	41666	80	50	TRA	CHI	OUI	OUI	NON	200	2	OUI	OUI	NON	NON	NON	NON	NON	NON	ROT	IN	3400	150000	425000	MARCHE	OUI	OUI	NON	NON	HER	NSS	3	50000	TE	OUI	OUI
MBE	78	F	36	PRI	MA	11	DO	CO	6	2	1	CUPU	MC	LAB	31250	80	40	TRA	ORG	NON	NON	OUI	200	1	OUI	OUI	NON	NON	NON	NON	NON	NON	AO	IN	1500	25000	150000	MARCHE	OUI	OUI	OUI	NON	DM	HOUES	2		EF	NON	NON
MBE	79	M	45	PFO	MA	18	HE	COVE	25	10	5	CUPU	BR	LS	41666	80	30	TRA	CHI	OUI	OUI	NON	100	1	OUI	OUI	OUI	NON	NON	NON	NON	NON	ROT	FTIN	2400	120000	300000	MARCHE	OUI	OUI	NON	NON	HER	NSS	3	50000	TE	OUI	OUI
MBE	80	M	36	SEC	CE	12	AC	COVE	5	6	6	CUPU	ML	LS	31250	80	40	TRA	CHI	OUI	OUI	NON	100	2	NON	OUI	OUI	NON	NON	NON	NON	NON	EC	FI	2000	100000	200000	MARCHE	OUI	OUI	NON	OUI	HER	NSS	3	35000	EF	OUI	OUI
MBE	81	M	45	PRI	MA	9	DO	CO	10	1.5	1.5	CUPU	MC	LAB	50000	80	25	TRA	CHI	OUI	NON	NON	50	1	NON	OUI	OUI	NON	OUI	NON	NON	NON	EC	FI	2000	50000	200000		OUI	OUI	OUI	NON	HER	NSS	2	15000	EF	OUI	OUI
MBE	82	M	38	SEC	MA	7	DO	COVE	2	2	2	CUPU	ML	SD	31250	80	40	TRA	CHI	OUI	OUI	NON	100	2	NON	OUI	OUI	NON	NON	NON	NON	NON	ROT	AUT	4000	200000	480000	MARCHE	OUI	OUI	OUI	NON	HER	NSS	3	75000	EF	OUI	OUI
MBE	83	M	43	SEC	MA	9	AC	COVE	25	3	1	CUPU	BR	LS	40000	50	50	TRA	CHI	OUI	OUI	NON	100	2	NON	OUI	OUI	NON	NON	NON	NON	NON	AUT	IN	3000	200000	375000	MARCHE	OUI	OUI	OUI	OUI	HER	NSS	3	35000	ME	OUI	OUI
MBE	84	M	49	SEC	MA	10	HE	COVE	25	8	4	CUPU	BR	LS	50000	80	25	TRA	CHI	OUI	OUI	NON	100	2	NON	OUI	OUI	NON	NON	NON	NON	NON	ROT	AUT	3500	220000	455000	MARCHE	OUI	OUI	OUI	OUI	HER	NSS	3	45000	ME	OUI	OUI
MBE	85	F	26	SEC	MA	4	LO	CO	1	1.5	1	CUPU	MC	SD	41666	80	30	TRA	CHI	OUI	OUI	NON	100	2	NON	OUI	NON	NON	NON	NON	NON	NON	EC	IN	2800	60000	280000		OUI	OUI	OUI	NON	HER	NSS	3	25000	ME	OUI	NON
MBE	86	M	34	SEC	CE	1	HE	COVE	12	1.5	1.5	CUPU	ML	LAB	50000	80	25	TRA	CHI	OUI	OUI	NON	100	2	NON	OUI	OUI	NON	NON	NON	NON	NON	ROT	IN	2800	120000	420000	MARCHE	OUI	OUI	OUI	NON	DMHE	NSS	2	18000	TE	OUI	NON
MBE	87	M	47	SEC	CE	9	HE	COVE	20	8	4	ASSO	DI	LS	31250	80	40	TRA	CHI	OUI	OUI	NON	200	2	OUI	OUI	OUI	NON	NON	NON	NON	NON	AUT	IN	3000	180000	300000	SUR PLACE	OUI	OUI	NON	OUI	DMHE	NSS	3	25000	ME	NON	OUI
MBE	88	M	45	PRI	MA	10	DO	COVE	15	3	1	CUPU	MC	SD	31250	80	40	TRA	CHI	OUI	OUI	NON	200	3	NON	OUI	OUI	NON	NON	NON	NON	NON	ROT	IN	2000	200000	300000	MARCHE	OUI	OUI	OUI	NON	HER	NSS	2	30000	TE	OUI	NON
MBE	89	M	45	SEC	MA	5	HE	COVE	4	7.5	1.5	CUPU	ML	SD	50000	80	25	TRA	CHI	OUI	OUI	NON	100	2	NON	OUI	NON	NON	NON	NON	NON	NON	EC	IN	3000	100000	510000	MARCHE	OUI	OUI	OUI	NON	HER	NSS	3	45000	TE	OUI	NON
MBE	90	M	49	PRI	MA	15	HE	COVE	35	3	2	CUPU	ML	SD	50000	80	25	TRA	CHI	OUI	OUI	NON	200	2	NON	OUI	OUI	NON	NON	OUI	OUI	NON	AO	AUT	2600	80000	260000	MARCHE	OUI	NON	NON	OUI	HER	NSS	2	25000	EF	OUI	OUI
MBE	91	F	28	PRI	MA	7	AC	COVE	5	2.5	1.5	CUPU	MC	LS	50000	80	25	TRA	ORG	NON	NON	OUI	200	1	NON	OUI	OUI	NON	NON	NON	NON	NON	AUT	FTIN	1500	40000	150000		OUI	OUI	OUI	NON	HER	NSS	3	25000	EF	OUI	OUI
MBE	92	M	45	SEC	MA	10	HE	COVE	15	15	10	CUPU	ML	SD	50000	80	25	TRA	CHI	OUI	OUI	NON	100	2	NON	OUI	NON	NON	NON	NON	NON	NON	ROT	FTIN	1400	200000	210000	MARCHE	OUI	NON	NON	NON	HER	NSS	3	25000	TE	OUI	OUI
MBE	93	M	48	SEC	MA	12	HE	COVE	20	10	4	CUPU	BR	SD	50000	80	25	TRA	CHI	OUI	OUI	NON	150	2	NON	OUI	OUI	NON	NON	NON	NON	NON	ROT	IN	1800	100000	180000	MARCHE	OUI	NON	NON	OUI	HER	NSS	3	30000	TE	OUI	OUI
MBE	94	M	46	SEC	MA	10	DO	COVE	3	5	5	CUPU	ML	SD	25000	80	50	TRA	CHI	OUI	NON	NON	100	2	OUI	NON	OUI	NON	NON	NON	NON	NON	JA	FTIN	2500	100000	250000	MARCHE	OUI	OUI	OUI	NON	HER	NSS	2	25000	EF	NON	OUI
NGANHA	95	M	45	SEC	MA	8	HE	COVE	30	7	2	CUPU	BR	LS	44444	75	30	TRA	CHI	OUI	OUI	NON	200	2	NON	OUI	OUI	NON	NON	NON	NON	NON	ROT	AUT	4000	220000	400000	MARCHE	OUI	NON	NON	NON	HER	NSS	2	20000	ME	OUI	OUI
NGANHA	96	M	46	PFO	MA	14	HE	COVE	25	20	8.75	CUPU	ML	LS	41619	70	30	TRA	CHI	OUI	OUI	NON	200	2	NON	OUI	NON	NON	NON	NON	NON	NON	AUT	IN	2400	80000	360000	MARCHE	OUI	OUI	NON	NON	HER	NSS	3	35000	ME	OUI	OUI
NGANHA	97	M	55	PFO	MA	17	HE	CO	40	35	2	CUPU	MC	SD	53333	75	25	TRA	CHI	OUI	OUI	NON	100	1	NON	OUI	NON	NON	NON	NON	NON	NON	JA	IN	1200	50000	120000		NON	OUI	NON	NON	HER	NSS	2	15000	ME	OUI	OUI
NGANHA	98	M	18	SEC	CE	5	HE	CO	3	2	1	ASSO	DI	LAB	50000	80	25	TRA	CHI	OUI	OUI	NON	150	2	OUI	OUI	OUI	NON	NON	NON	NON	NON	EC	AUT	1600	80000	160000		OUI	OUI	OUI	NON	HER	NSS	2	20000	EF	OUI	OUI
NGANHA	99	M	26	PRI	CE	19	AC	COVE	3	3	2	ASSO	DI	LAB	50000	80	25	TRA	CHI	OUI	OUI	NON	150	2	OUI	NON	OUI	NON	NON	NON	NON	NON	EC	FTIN	1200	60000	120000		OUI	OUI	NON	NON	DMHE	NSS	3	50000	ME	OUI	NON
NGANHA	100	M	40	PFO	MA	5	DO	COVE	10	8	8	CUPU	BR	LAB	50000	80	25	TRA	CHI	OUI	OUI	NON	100	1	NON	OUI	OUI	NON	NON	NON	NON	NON	EC	AUT	1500	75000	150000	MARCHE	OUI	OUI	NON	NON	DMHE	SE	2	25000	EF	OUI	OUI
NGANHA	101	M	22	PRI	MA	2	HE	COVE	7	6	2	CUPU	BR	LAB	41666	80	30	TRA	CHI	OUI	OUI	NON	100	2	NON	OUI	OUI	NON	NON	NON	NON	NON	ROT	FTIN	3200	100000	384000	MARCHE	OUI	OUI	OUI	NON	HER	NSS	2	30000	ME	OUI	OUI
NGANHA	102	M	30	SEC	CE	1	LO	VE	5	5	3	CUPU	ML	LAB	31250	80	40	TRA	CHI	OUI	OUI	NON	300	2	NON	OUI	OUI	NON	NON	NON	NON	NON	ROT	AUT	3200	200000	384000	MARCHE	OUI	NON	NON	NON	DMHE	SE	1	20000	EF	NON	OUI
NGANHA	103	M	21	PRI	MA	5	HE	COVE	5	3	1	ASSO	DI	LAB	41619	70	30	TRA	CHI	OUI	NON	NON	100	1	NON	OUI	OUI	NON	NON	NON	NON	NON	ROT	IN	2800	45000	336000	MARCHE	OUI	OUI	OUI	NON	DMHE	NSS	2	48000	ME	NON	OUI
NGANHA	104	M	35	PFO	CE	9	AC	COVE	20	3.5	1.5	CUPU	BR	LS	50000	80	25	TRA	CHI	OUI	OUI	NON	150	1	NON	OUI	OUI	NON	NON	NON	NON	NON	AO	FI	2400	80000	240000	MARCHE	OUI	OUI	OUI	NON	DMHE	NSS	2	21000	ME	OUI	OUI
NGANHA	105	M	30	PRI	MA	4	AC	COVE	3	4	1	CUPU	BR	LAB	50000	80	25	TRA	CHI	OUI	OUI	NON	150	2	NON	OUI	OUI	NON	NON	NON	NON	NON	EC	FI	4000	150000	400000	MARCHE	OUI	OUI	NON	NON	DMHE	NSS	2	50000	ME	OUI	NON
NGANHA	106	M	36	PRI	CE	12	HE	COVE	11	3	2	CUPU	BR	LAB	50000	80	25	TRA	CHI	OUI	OUI	NON	200	2	OUI	OUI	OUI	NON	NON	NON	NON	NON	AUT	AUT	4400	150000	400000	MARCHE	OUI	OUI	OUI	NON	DMHE	NSS	2	50000	ME	OUI	NON
NGANHA	107	M	33	PRI	CE	12	HE	COVE	10	6	3	CUPU	BR	LAB	50000	80	25	TRA	CHI	OUI	OUI	NON	250	2	NON	OUI	OUI	NON	NON	NON	NON	NON	EC	FTIN	3200	150000	320000	MARCHE	OUI	OUI	OUI	NON	DMHE	NSS	2	50000	PE	OUI	OUI
NGANHA	108	M	45	PRI	MA	16	HE	COVE	30	5	2	CUPU	MC	SD	50000	80	25	TRA	CHI	OUI	OUI	NON	200	2	NON	OUI	OUI	NON	NON	NON	NON	NON	ROT	AUT	3200	240000	384000	MARCHE	OUI	OUI	OUI	NON	HER	NSS	3	60000	TE	OUI	OUI
NGANHA	109	M	23	SEC	CE	2	HE	COVE	3	3.5	1.5	CUPU	BR	LAB	31250	80	50	TRA	CHI	OUI	OUI	NON	200	2	NON	OUI	OUI	NON	NON	NON	NON	NON	ROT	IN	1100	100000	132000	MARCHE	OUI	OUI	NON	NON	HER	NSS	1	20000	TE	OUI	NON
NGANHA	110	M	52	SEC	MA	23	HE	COVE	35	21	12	CUPU	BR	LAB	31250	80	50	TRA	CHI	OUI	OUI	NON	150	2	NON	OUI	OUI	NON	NON	NON	NON	NON	AUT	IN	4400	300000	528000	MARCHE	OUI	OUI	OUI	NON	HER	SE	2	20000	ME	OUI	OUI
NGANHA	111	M	32	PRI	CE	7	AC	COVE	20	2	1	CUPU	BR	LS	41666	80	30	TRA	CHI	OUI	OUI	NON	200	2	NON	OUI	NON	NON	NON	NON	NON	NON	ROT	IN	3600	200000	360000	MARCHE	OUI	OUI	NON	NON	HER	NSS	3	60000	ME	NON	OUI
NGANHA	112	M	30	SEC	MA	4	AC	CO	12	1	1	CUPU	ML	SD	41666	80	30	TRA	CHI	OUI	OUI	NON	200	2	NON	OUI	NON	NON	NON	NON	NON	NON	EC	IN	3200	60000	320000		OUI	OUI	OUI	NON	HER	NSS	2	20000	TE	OUI	NON
NGANHA	113	F	21	PRI	MA	4	DO	CO	5	1	1	CUPU	MC	LAB	41666	80	30	TRA	CHI	OUI	OUI	NON	150	2	NON	OUI	OUI	NON	NON	NON	NON	NON	EC	IN	1500	100000	150000		OUI	OUI	NON	NON	HER	NSS	1	15000	EF	OUI	OUI
NGANHA	114	M	25	SEC	CE	15	DO	COVE	8	15	1.75	ASSO	DI	LAB	31250	80	40	TRA	CHI	OUI	OUI	NON	400	2	NON	OUI	OUI	NON	NON	NON	NON	NON	ROT	IN	5000	400000	900000	MARCHE	NON	OUI	NON	NON	DMHE	NSS	2	30000	ME	OUI	OUI
NGANHA	115	M	32	SEC	MA	5	HE	CO	7	5	1	CUPU	MC	LAB	50000	80	25	AME	CHI	OUI	OUI	NON	200	2	NON	OUI	OUI	NON	NON	NON	NON	NON	ROT	IN	3200	120000	320000		OUI	OUI	NON	OUI	HER	NSS	4	60000	ME	OUI	OUI
NGANHA	116	M	41	SEC	CE	7	HE	COVE	10	10	4	CUPU	BR	LAB	50000	80	25	TRA	CHI	OUI	OUI	NON	200	2	NON	OUI	NON	NON	OUI	NON	NON	NON	EC	FTIN	4000	150000	400000	MARCHE	OUI	OUI	NON	NON	HER	SE	1	15000	EF	OUI	NON
NGANHA	117	M	45	PRI	MA	15	HE	COVE	30	12	5	CUPU	BR	LAB	50000	80	25	TRA	CHI	OUI	OUI	NON	200	2	OUI	OUI	OUI	NON	NON	NON	NON	NON	EC	AUT	2500	200000	325000	MARCHE	OUI	OUI	NON	NON	DMHE	SE	2	25000	EF	OUI	NON
NGANHA	118	M	30	PRI	MA	6	HE	COVE	8	3	3	CUPU	BR	LAB	50000	80	25	TRA	CHI	OUI	OUI	NON	150	2	OUI	NON	OUI	NON	NON	NON	NON	NON	EC	FI	2000	100000	240000	MARCHE	OUI	OUI	OUI	NON	DMHE	SE	2	30000	EF	OUI	NON
NGANHA	119	M	47	PFO	MA	6	HE	COVE	20	5	4	CUPU	BR	SD	40000	50	50	TRA	CHI	OUI	NON	NON	200	2	NON	OUI	NON	NON	NON	NON	NON	NON	ROT	IN	4000	160000	400000	MARCHE	OUI	OUI	OUI	NON	DMHE	NSS	2	30000	ME	NON	OUI
NGANHA	120	M	60	PFO	MA	4	HE	COVE	25	4.5	2.5	CUPU	BR	LAB	41666	80	30	AME	CHI	OUI	NON	NON	200	2	OUI	OUI	OUI	NON	NON	NON	NON	NON	EC	FTIN	3500	130000	350000	MARCHE	OUI	OUI	OUI	NON	HER	SE	2	25000	TE	OUI	NON
NGANHA	121	M	62	PFO	MA	9	DO	COVE	30	6	3	CUPU	BR	LAB	41666	80	30	TRA	CHI	OUI	OUI	NON	300	2	OUI	OUI	NON	NON	NON	NON	NON	NON	EC	IN	3600	220000	360000	MARCHE	OUI	OUI	NON	NON	DMHE	SE	2	20000	EF	OUI	OUI
NGANHA	122	M	60	PRI	MA	12	HE	COVE	50	30	20	CUPU	BR	LAB	50000	80	25	AME	CHI	OUI	OUI	NON	200	2	OUI	OUI	OUI	NON	NON	NON	NON	NON	AUT	FTIN	5000	180000	500000	MARCHE	OUI	OUI	OUI	NON	HER	SE	2	22500	TE	OUI	OUI
NGANHA	123	M	70	PFO	MA	8	HE	COVE	25	7	1	CUPU	ML	LS	31250	80	40	AME	CHI	OUI	OUI	NON	200	2	OUI	OUI	OUI	NON	NON	NON	NON	NON	AUT	FTIN	4500	150000	450000	MARCHE	OUI	OUI	OUI	NON	HER	NSS	3	70000	ME	OUI	NON
NGANHA	124	M	55	PRI	MA	13	HE	COVE	20	5	2	CUPU	BR	LAB	50000	80	25	TRA	CHI	OUI	OUI	NON	250	2	OUI	OUI	OUI	NON	NON	NON	NON	NON	EC	AUT	4000	200000	400000	MARCHE	OUI	OUI	NON	NON	DMHE	NSS	3	60000	EF	OUI	OUI
NGANHA	125	M	49	SEC	MA	11	HE	COVE	29	10	4	CUPU	BR	LAB	50000	80	25	TRA	CHI	OUI	OUI	NON	200	2	NON	OUI	OUI	NON	OUI	NON	NON	NON	JA	IN	4000	150000	400000	MARCHE	OUI	OUI	NON	NON	HER	NSS	2	25000	ME	OUI	OUI
NGANHA	126	M	57	PRI	MA	13	HE	COVE	25	2	2	CUPU	BR	SD	31250	80	40	AME	CHI	OUI	NON	NON	200	1	OUI	OUI	OUI	NON	NON	NON	NON	NON	EC	FTIN	4100	300000	410000	MARCHE	OUI	OUI	OUI	NON	HER	NSS	3	40000	TE	OUI	NON
NGANHA	127	M	25	SEC	CE	7	HE	COVE	7	2.5	1.5	CUPU	MC	SD	41619	70	30	TRA	CHI	OUI	OUI	NON	150	2	OUI	OUI	NON	NON	NON	NON	NON	NON	AUT	FTIN	1200	75000	120000	MARCHE	OUI	OUI	OUI	NON	HER	NSS	2	15000	TE	OUI	NON
NGANHA	128	M	35	SEC	MA	8	HE	COVE	22	25	3	CUPU	BR	SD	41619	70	30	TRA	CHI	OUI	NON	NON	300	2	OUI	OUI	OUI	NON	NON	NON	NON	NON	EC	FTIN	5000	300000	500000	MARCHE	OUI	OUI	OUI	NON	HER	NSS	3	65000	TE	OUI	NON
NGANHA	129	F	30	PFO	MA	7	AC	COVE	10	1.5	1	CUPU	ML	LS	41666	80	30	AME	CHI	OUI	OUI	NON	150	2	OUI	OUI	NON	NON	NON	NON	NON	NON	EC	IN	2000	130000	250000	MARCHE	OUI	OUI	OUI	NON	HER	NSS	2	25000	EF	OUI	OUI
NGANHA	130	F	45	PFO	MA	9	DO	COVE	20	4	1	CUPU	MC	LS	41666	80	30	AME	CHI	OUI	OUI	NON	150	2	OUI	OUI	OUI	NON	NON	NON	NON	NON	AUT	FTIN	2500	75000	250000	MARCHE	OUI	OUI	OUI	NON	HER	NSS	3	50000	TE	OUI	OUI
NGANHA	131	M	35	PRI	MA	12	HE	COVE	20	15	4.5	CUPU	BR	LS	31250	80	40	AME	CHI	OUI	NON	NON	200	2	OUI	NON	NON	NON	NON	NON	NON	NON	AUT	IN	2800	150000	350000	MARCHE	OUI	OUI	NON	NON	HER	NSS	3	40000	TE	OUI	NON
NGANHA	132	M	39	PRI	MA	10	AC	COVE	3	16	3	CUPU	BR	LS	41666	80	30	TRA	CHI	OUI	NON	NON	200	2	OUI	OUI	OUI	NON	NON	NON	NON	NON	EC	IN	4000	200000	400000	MARCHE	OUI	OUI	OUI	NON	HER	NSS	3	50000	EF	OUI	NON
NGANHA	133	M	22	SEC	CE	6	HE	COVE	5	2	1	CUPU	ML	LAB	41666	80	30	TRA	CHI	OUI	OUI	NON	150	2	OUI	OUI	NON	NON	NON	NON	NON	NON	AUT	FTIN	1500	80000	150000	MARCHE	OUI	OUI	NON	NON	DM	HOUES	2	20000	TE	NON	NON
NGANHA	134	F	25	PFO	MA	3	AC	COVE	5	3	1.5	ASSO	BR	LAB	31250	80	40	TRA	CHI	OUI	OUI	NON	100	2	NON	OUI	NON	NON	NON	NON	NON	NON	AO	IN	1500	85000	150000	MARCHE	OUI	OUI	NON	NON	DM	HOUES	2	30000	TE	OUI	NON
NGANHA	135	M	27	SEC	CE	5	HE	COVE	12	2	1	CUPU	BR	LAB	37000	90	30	AME	CHI	OUI	NON	NON	200	2	OUI	OUI	OUI	NON	NON	NON	NON	NON	EC	FTIN	2800	125000	350000	MARCHE	OUI	OUI	NON	NON	HER	SE	2	20000	EF	OUI	NON
NGANHA	136	M	21	SEC	CE	6	HE	COVE	8	1.5	1	CUPU	MC	SD	31250	80	40	AME	CHI	OUI	NON	NON	100	1	OUI	OUI	OUI	NON	NON	NON	NON	NON	EC	FTIN	1200	100000	150000	MARCHE	OUI	OUI	OUI	NON	HER	NSS	2	15000	TE	OUI	OUI
NGANHA	137	M	37	SEC	MA	20	HE	COVE	25	100	15	CUPU	BR	LS	41619	70	30	TRA	CHI	OUI	OUI	NON	200	2	OUI	OUI	NON	NON	NON	NON	NON	NON	AUT	FTIN	1200	100000	150000	MARCHE	OUI	OUI	OUI	NON	HER	NSS	2	20000	TE	OUI	OUI
NGANHA	138	M	30	SEC	MA	16	HE	COVE	15	2	1.25	CUPU	BR	LAB	41619	70	30	TRA	CHI	OUI	OUI	NON	300	2	OUI	OUI	OUI	NON	NON	NON	NON	NON	EC	FTIN	4200	300000	525000	MARCHE	OUI	OUI	OUI	NON	HER	NSS	3	50000	EF	OUI	OUI
NGANHA	139	M	35	SEC	CE	10	HE	COVE	4	10	2	CUPU	BR	LS	31250	80	40	TRA	CHI	OUI	OUI	NON	200	2	OUI	OUI	NON	NON	NON	NON	NON	NON	AUT	IN	4000	150000	400000	MARCHE	OUI	OUI	OUI	NON	HER	NSS	3	50000	ME	OUI	OUI
NGANHA	140	M	65	PRI	MA	7	AC	COVE	5	3	1	CUPU	MC	LS	41666	80	30	AME	CHI	OUI	OUI	NON	150	2	OUI	NON	NON	NON	NON	NON	NON	NON	EC	IN	1500	80000	150000	MARCHE	OUI	OUI	OUI	NON	HER	NSS	2	25000	ME	OUI	OUI
NGANHA	141	F	35	PRI	MA	12	AC	COVE	20	3	1	CUPU	ML	LS	31250	80	40	AME	CHI	OUI	OUI	NON	200	2	OUI	OUI	OUI	NON	NON	NON	NON	NON	EC	IN	3000	250000	375000	MARCHE	OUI	NON	OUI	NON	HER	NSS	2	42000	EF	OUI	OUI
NGANHA	142	M	60	PFO	MA	11	HE	COVE	49	3	1	CUPU	BR	LAB	41666	80	30	TRA	CHI	OUI	OUI	NON	200	2	OUI	OUI	NON	NON	NON	NON	NON	NON	EC	IN	2100	160000	252000	MARCHE	OUI	OUI	NON	NON	HER	SE	2	27000	TE	OUI	NON
NGANHA	143	M	58	PRI	MA	13	HE	COVE	25	5	3	CUPU	BR	SD	50000	80	25	TRA	CHI	OUI	OUI	NON	150	2	NON	OUI	NON	NON	NON	NON	NON	NON	ROT	IN	2400	120000	240000	MARCHE	OUI	OUI	NON	NON	DMHE	NSS	3	40000	EF	OUI	OUI
NGANHA	144	M	46	PFO	MA	14	HE	COVE	25	20	8.75	CUPU	ML	LS	41619	70	30	TRA	CHI	OUI	OUI	NON	200	2	NON	OUI	NON	NON	NON	NON	NON	NON	AUT	IN	2400	80000	360000	MARCHE	OUI	OUI	NON	NON	HER	NSS	3	35000	ME	OUI	OUI
NGANHA	145	M	55	PFO	MA	17	HE	CO	40	35	2	CUPU	MC	SD	53333	75	25	TRA	CHI	OUI	OUI	NON	100	1	NON	OUI	NON	NON	NON	NON	NON	NON	JA	IN	1200	50000	120000		NON	OUI	NON	NON	HER	NSS	2	15000	ME	OUI	OUI
NGANHA	146	M	18	SEC	CE	5	HE	CO	3	2	1	ASSO	DI	LAB	50000	80	25	TRA	CHI	OUI	OUI	NON	150	2	OUI	OUI	OUI	NON	NON	NON	NON	NON	EC	AUT	1600	80000	160000		OUI	OUI	OUI	NON	HER	NSS	2	20000	EF	OUI	NON
NGANHA	147	M	26	PRI	CE	19	AC	COVE	3	3	2	ASSO	DI	LAB	50000	80	25	TRA	CHI	OUI	OUI	NON	150	2	OUI	OUI	NON	NON	NON	NON	NON	NON	EC	FTIN	1200	60000	120000		OUI	OUI	NON	NON	DMHE	NSS	3	50000	ME	OUI	NON
NGANHA	148	M	40	PFO	MA	5	AC	COVE	10	8	8	CUPU	BR	LAB	50000	80	25	TRA	CHI	OUI	OUI	NON	100	1	NON	OUI	OUI	NON	NON	NON	NON	NON	EC	FTIN	1500	75000	150000	MARCHE	OUI	OUI	NON	NON	DMHE	SE	2	25000	EF	OUI	OUI
NGANHA	149	M	22	PRI	MA	2	HE	COVE	7	6	2	CUPU	BR	LAB	41666	80	30	TRA	CHI	OUI	OUI	NON	100	2	NON	OUI	OUI	NON	NON	NON	NON	NON	ROT	AUT	3200	100000	384000	MARCHE	OUI	OUI	OUI	NON	HER	NSS	2	30000	ME	OUI	OUI
NGANHA	150	M	30	SEC	CE	1	LO	VE	5	5	3	CUPU	ML	LAB	31250	80	40	TRA	CHI	OUI	OUI	NON	300	2	NON	OUI	OUI	NON	NON	NON	NON	NON	ROT	AUT	3200	200000	384000	MARCHE	OUI	NON	NON	NON	DMHE	SE	1	20000	EF	NON	OUI
NGANHA	151	M	21	PRI	MA	5	HE	COVE	5	3	1	ASSO	DI	LAB	41619	70	30	TRA	CHI	OUI	NON	NON	100	1	NON	OUI	OUI	NON	NON	NON	NON	NON	ROT	IN	2800	45000	336000	MARCHE	OUI	OUI	OUI	NON	DMHE	NSS	2	48000	ME	NON	OUI
NGANHA	152	M	35	PFO	CE	9	HE	COVE	20	3.5	1.5	CUPU	BR	LS	50000	80	25	TRA	CHI	OUI	OUI	NON	150	1	NON	OUI	OUI	NON	NON	NON	NON	NON	AO	AUT	2400	80000	240000	MARCHE	OUI	OUI	OUI	NON	DMHE	NSS	2	21000	ME	OUI	OUI
NGANHA	153	M	30	PRI	MA	4	AC	COVE	3	4	1	CUPU	BR	LAB	50000	80	25	TRA	CHI	OUI	OUI	NON	150	2	NON	OUI	OUI	NON	NON	NON	NON	NON	EC	AUT	4000	150000	400000	MARCHE	OUI	OUI	NON	NON	DMHE	NSS	2	50000	ME	OUI	NON
NGANHA	154	M	36	PRI	CE	12	HE	COVE	11	3	2	CUPU	BR	LAB	50000	80	25	TRA	CHI	OUI	OUI	NON	200	2	OUI	OUI	OUI	NON	NON	NON	NON	NON	AUT	AUT	4400	150000	400000	MARCHE	OUI	OUI	OUI	NON	DMHE	NSS	2	50000	ME	OUI	NON
NGANHA	155	M	33	PRI	CE	12	HE	COVE	10	6	3	CUPU	BR	LAB	50000	80	25	TRA	CHI	OUI	OUI	NON	250	2	NON	OUI	OUI	NON	NON	NON	NON	NON	EC	FTIN	3200	150000	320000	MARCHE	OUI	OUI	OUI	NON	DMHE	NSS	2	50000	PE	OUI	OUI
NGANHA	156	M	45	PRI	MA	16	HE	COVE	30	5	2	CUPU	MC	SD	50000	80	25	TRA	CHI	OUI	OUI	NON	200	2	NON	OUI	OUI	NON	NON	NON	NON	NON	ROT	AUT	3200	240000	384000	MARCHE	OUI	OUI	OUI	NON	HER	NSS	3	60000	TE	OUI	OUI
NGANHA	157	M	23	SEC	CE	2	HE	COVE	3	3.5	1.5	CUPU	BR	LAB	31250	80	50	TRA	CHI	OUI	OUI	NON	200	2	NON	OUI	OUI	NON	NON	NON	NON	NON	ROT	IN	1100	100000	132000	MARCHE	OUI	OUI	NON	NON	HER	NSS	1	20000	TE	OUI	NON
NGANHA	158	M	52	SEC	MA	23	HE	COVE	35	21	12	CUPU	BR	LAB	31250	80	50	TRA	CHI	OUI	OUI	NON	150	2	NON	OUI	OUI	NON	NON	NON	NON	NON	AUT	IN	4400	300000	528000	MARCHE	OUI	OUI	OUI	NON	HER	SE	2	20000	ME	OUI	OUI
NGANHA	159	M	32	PRI	CE	7	AC	COVE	20	2	1	CUPU	BR	LS	41666	80	30	TRA	CHI	OUI	OUI	NON	200	2	NON	OUI	NON	NON	NON	NON	NON	NON	ROT	IN	3600	200000	360000	MARCHE	OUI	OUI	NON	NON	HER	NSS	3	60000	ME	NON	OUI
NGANHA	160	M	30	SEC	MA	4	AC	CO	12	1	1	CUPU	ML	SD	41666	80	30	TRA	CHI	OUI	OUI	NON	200	2	NON	OUI	NON	NON	NON	NON	NON	NON	EC	IN	3200	60000	320000		OUI	OUI	OUI	NON	HER	NSS	2	20000	TE	OUI	NON
NGANHA	161	F	21	PRI	MA	4	DO	CO	5	1	1	CUPU	MC	LAB	41666	80	30	TRA	CHI	OUI	OUI	NON	150	2	NON	OUI	OUI	NON	NON	NON	NON	NON	EC	IN	1500	100000	150000		OUI	OUI	NON	NON	HER	NSS	1	15000	EF	OUI	OUI
NGANHA	162	M	25	SEC	CE	15	DO	COVE	8	15	1.75	ASSO	DI	LAB	31250	80	40	TRA	CHI	OUI	OUI	NON	400	2	NON	OUI	OUI	NON	NON	NON	NON	NON	ROT	IN	5000	400000	900000	MARCHE	NON	OUI	NON	NON	DMHE	NSS	2	30000	ME	OUI	OUI
NGANHA	163	M	32	SEC	MA	5	HE	CO	7	5	1	CUPU	MC	LAB	50000	80	25	AME	CHI	OUI	OUI	NON	200	2	NON	OUI	OUI	NON	NON	NON	NON	NON	ROT	IN	3200	120000	320000		NON	OUI	NON	OUI	HER	NSS	4	60000	ME	OUI	OUI
NGANHA	164	M	41	SEC	CE	7	HE	COVE	10	10	4	CUPU	BR	LAB	50000	80	25	TRA	CHI	OUI	OUI	NON	200	2	NON	NON	OUI	NON	OUI	NON	NON	NON	EC	FTIN	4000	150000	400000	MARCHE	OUI	OUI	NON	NON	HER	SE	1	15000	EF	OUI	NON
NGANHA	165	M	45	PRI	MA	15	HE	COVE	30	12	5	CUPU	BR	LAB	50000	80	25	TRA	CHI	OUI	OUI	NON	200	2	NON	NON	OUI	NON	OUI	NON	NON	NON	EC	AUT	2500	200000	325000	MARCHE	OUI	OUI	NON	NON	DMHE	SE	2	25000	EF	OUI	NON
NGANHA	166	M	30	PRI	MA	6	HE	COVE	8	3	3	CUPU	BR	LAB	50000	80	25	TRA	CHI	OUI	OUI	NON	150	2	NON	OUI	OUI	NON	NON	NON	NON	NON	EC	FI	2000	100000	240000	MARCHE	OUI	OUI	OUI	NON	DMHE	SE	2	30000	EF	OUI	NON
NGANHA	167	M	47	PFO	MA	6	HE	COVE	20	5	4	CUPU	BR	SD	40000	50	50	TRA	CHI	OUI	NON	NON	200	2	NON	OUI	NON	NON	NON	NON	NON	NON	ROT	IN	4000	160000	400000	MARCHE	OUI	OUI	OUI	NON	DMHE	NSS	2	30000	ME	NON	OUI
NGANHA	168	M	60	PFO	MA	4	HE	COVE	25	4.5	2.5	CUPU	BR	LAB	41666	80	30	AME	CHI	OUI	NON	NON	200	2	OUI	OUI	OUI	NON	NON	NON	NON	NON	EC	FTIN	3500	130000	350000	MARCHE	OUI	OUI	OUI	NON	HER	SE	2	25000	TE	OUI	NON
NGANHA	169	M	60	PRI	MA	12	HE	COVE	50	30	20	CUPU	BR	LAB	50000	80	25	AME	CHI	OUI	OUI	NON	200	2	OUI	OUI	OUI	NON	NON	NON	NON	NON	AUT	FTIN	5000	180000	500000	MARCHE	OUI	OUI	OUI	NON	HER	SE	2	22500	TE	OUI	OUI
NGANHA	170	M	70	PFO	MA	8	HE	COVE	25	7	1	CUPU	ML	LS	31250	80	40	AME	CHI	OUI	OUI	NON	200	2	OUI	OUI	OUI	NON	NON	NON	NON	NON	AUT	FTIN	4500	150000	450000	MARCHE	OUI	OUI	OUI	NON	HER	NSS	3	70000	ME	OUI	NON
NGANHA	171	M	55	PRI	MA	13	HE	COVE	20	5	2	CUPU	BR	LAB	50000	80	25	TRA	CHI	OUI	OUI	NON	250	2	OUI	OUI	OUI	NON	NON	NON	NON	NON	EC	AUT	4000	200000	400000	MARCHE	OUI	OUI	NON	NON	DMHE	NSS	3	60000	EF	OUI	OUI
NGANHA	172	M	49	SEC	MA	11	HE	COVE	29	10	4	CUPU	BR	LAB	50000	80	25	TRA	CHI	OUI	OUI	NON	200	2	NON	OUI	OUI	NON	OUI	NON	NON	NON	JA	IN	4000	150000	400000	MARCHE	OUI	OUI	NON	NON	HER	NSS	2	25000	ME	OUI	OUI
NGANHA	173	M	57	PRI	MA	13	HE	COVE	25	2	2	CUPU	BR	SD	31250	80	40	AME	CHI	OUI	NON	NON	200	1	OUI	OUI	OUI	NON	NON	NON	NON	NON	EC	AUT	4100	300000	410000	MARCHE	OUI	OUI	OUI	NON	HER	NSS	3	40000	TE	OUI	NON
NGANHA	174	M	25	SEC	CE	7	HE	COVE	7	2.5	1.5	CUPU	MC	SD	41619	70	30	TRA	CHI	OUI	OUI	NON	150	2	OUI	OUI	NON	NON	NON	NON	NON	NON	AUT	FI	1200	75000	120000	MARCHE	OUI	OUI	OUI	NON	HER	NSS	2	15000	TE	OUI	NON
NGANHA	175	M	35	SEC	MA	8	HE	COVE	22	25	3	CUPU	BR	SD	41619	70	30	TRA	CHI	OUI	NON	NON	300	2	OUI	OUI	OUI	NON	NON	NON	NON	NON	EC	FI	5000	300000	500000	MARCHE	OUI	OUI	OUI	NON	HER	NSS	3	65000	TE	OUI	NON
NGANHA	176	F	30	PFO	MA	7	AC	COVE	10	1.5	1	CUPU	ML	LS	41666	80	30	AME	CHI	OUI	OUI	NON	150	2	OUI	OUI	NON	NON	NON	NON	NON	NON	EC	IN	2000	130000	250000	MARCHE	OUI	OUI	OUI	NON	HER	NSS	2	25000	EF	OUI	OUI
NGANHA	177	F	45	PFO	MA	9	DO	COVE	20	4	1	CUPU	MC	LS	41666	80	30	AME	CHI	OUI	OUI	NON	150	2	OUI	OUI	OUI	NON	NON	NON	NON	NON	EC	AUT	2500	75000	250000	MARCHE	OUI	OUI	OUI	NON	HER	NSS	3	50000	TE	OUI	OUI
NGANHA	178	M	35	PRI	MA	12	HE	COVE	20	15	4.5	CUPU	BR	LS	31250	80	40	AME	CHI	OUI	NON	NON	200	2	OUI	NON	NON	NON	NON	NON	NON	NON	AUT	IN	2800	150000	350000	MARCHE	OUI	OUI	NON	NON	HER	NSS	3	40000	TE	OUI	NON
NGANHA	179	M	39	PRI	MA	10	AC	COVE	3	16	3	CUPU	BR	LS	41666	80	30	TRA	CHI	OUI	NON	NON	200	2	OUI	OUI	OUI	NON	NON	NON	NON	NON	EC	IN	4000	200000	400000	MARCHE	OUI	OUI	OUI	NON	HER	NSS	3	50000	EF	OUI	NON
NGANHA	180	M	22	SEC	CE	6	HE	COVE	5	2	1	CUPU	ML	LAB	41666	80	30	TRA	CHI	OUI	OUI	NON	150	2	OUI	OUI	NON	NON	NON	NON	NON	NON	AUT	AUT	1500	80000	150000	MARCHE	OUI	OUI	NON	NON	DM	HOUES	2	20000	TE	NON	NON
NGANHA	181	F	25	PFO	MA	3	AC	COVE	5	3	1.5	ASSO	BR	LAB	31250	80	40	TRA	CHI	OUI	OUI	NON	100	2	NON	OUI	NON	NON	NON	NON	NON	NON	AO	IN	1500	85000	150000	MARCHE	OUI	OUI	NON	NON	DM	HOUES	2	30000	TE	OUI	NON
NGANHA	182	M	27	SEC	CE	5	HE	COVE	12	2	1	CUPU	BR	LAB	37000	90	30	AME	CHI	OUI	NON	NON	200	2	OUI	OUI	OUI	NON	NON	NON	NON	NON	EC	FI	2800	125000	350000	MARCHE	OUI	OUI	NON	NON	HER	SE	2	20000	EF	OUI	NON
NGANHA	183	M	21	SEC	CE	6	HE	COVE	8	1.5	1	CUPU	MC	SD	31250	80	40	AME	CHI	OUI	NON	NON	100	1	OUI	OUI	OUI	NON	NON	NON	NON	NON	EC	AUT	1200	100000	150000	MARCHE	OUI	OUI	OUI	NON	HER	NSS	2	15000	TE	OUI	OUI
NGANHA	184	M	37	SEC	MA	20	HE	COVE	25	100	15	CUPU	BR	LS	41619	70	30	TRA	CHI	OUI	OUI	NON	200	2	OUI	OUI	NON	NON	NON	NON	NON	NON	AUT	AUT	1200	100000	150000	MARCHE	OUI	OUI	OUI	NON	HER	NSS	2	20000	TE	OUI	OUI
MARTAP	185	M	47	PFO	MA	12	DO	COVE	12	20	10	CUPU	BR	SD	80000	50	25	TRA	CHI	OUI	NON	NON	50	1	NON	OUI	OUI	NON	NON	NON	NON	NON	JA	IN	2200	50000	264000	MARCHE	OUI	OUI	OUI	NON	HER	NSS	2	17000	ME	OUI	OUI
MARTAP	186	M	47	SEC	MA	8	HE	COVE	11	50	40	CUPU	BR	LS	41666	80	30	TRA	CHI	OUI	OUI	NON	150	2	OUI	OUI	OUI	NON	NON	NON	NON	NON	AUT	FI	2000	100000	200000	MARCHE	OUI	OUI	NON	NON	HER	NSS	2	20000	EF	OUI	OUI
MARTAP	187	M	44	PFO	MA	19	DO	COVE	25	10	6	CUPU	BR	SD	41666	80	30	TRA	CHI	OUI	OUI	NON	150	2	NON	OUI	OUI	NON	NON	NON	NON	NON	AUT	FI	2500	180000	250000	MARCHE	OUI	OUI	NON	NON	HER	NSS	3	30000	EF	OUI	OUI
MARTAP	188	M	42	PFO	MA	22	HE	COVE	18	22	10	CUPU	BR	SD	41619	70	30	TRA	CHI	OUI	OUI	NON	250	2	NON	OUI	OUI	NON	NON	NON	NON	NON	AUT	FI	3000	200000	390000	MARCHE	OUI	OUI	OUI	NON	HER	NSS	3	40000	TE	OUI	NON
MARTAP	189	M	28	PFO	MA	5	DO	COVE	5	1	1	CUPU	MC	SD	31250	80	40	TRA	CHI	OUI	OUI	NON	200	2	NON	OUI	OUI	NON	NON	NON	NON	NON	EC	FI	3000	150000	300000	MARCHE	OUI	OUI	NON	NON	HER	NSS	3	40000	TE	OUI	NON
MARTAP	190	M	23	PFO	MA	2	HE	CO	4	1.5	1	CUPU	BR	SD	31250	80	40	TRA	CHI	OUI	NON	NON	100	1	NON	OUI	OUI	NON	NON	NON	NON	NON	EC	FI	1000	50000	100000		OUI	OUI	NON	NON	HER	NSS	2	25000	EF	OUI	NON
MARTAP	191	M	24	PRI	MA	21	HE	COVE	10	6	3	CUPU	BR	SD	41666	80	30	TRA	CHI	OUI	OUI	NON	200	2	OUI	OUI	OUI	NON	NON	NON	NON	NON	EC	FTIN	4000	185000	400000	MARCHE	OUI	OUI	OUI	NON	HER	NSS	3	45000	TE	OUI	NON
MARTAP	192	M	67	PFO	MA	40	DO	COVE	30	20	20	CUPU	BR	LS	41666	80	30	TRA	CHI	OUI	OUI	NON	100	2	OUI	OUI	OUI	NON	NON	NON	NON	NON	EC	FTIN	1500	80000	150000	MARCHE	OUI	OUI	NON	NON	HER	NSS	2	24000	EF	OUI	NON
MARTAP	193	M	51	PFO	MA	31	HE	COVE	23	110	10	CUPU	MC	LS	37000	90	30	TRA	CHI	OUI	NON	NON	100	1	OUI	OUI	OUI	NON	NON	NON	NON	NON	AUT	FTIN	2000	70000	200000	MARCHE	OUI	OUI	OUI	NON	HER	NSS	2	15000	ME	OUI	OUI
MARTAP	194	M	54	PRI	MA	15	HE	COVE	20	6	4	CUPU	MC	SD	37000	90	30	TRA	CHI	OUI	NON	NON	100	1	OUI	OUI	OUI	OUI	NON	NON	OUI	NON	ROT	FTIN	2000	50000	200000	MARCHE	OUI	OUI	OUI	NON	HER	NSS	2	18000	EF	OUI	NON
MARTAP	195	M	50	PRI	MA	25	DO	COVE	6	15	7	CUPU	BR	LAB	31250	80	40	TRA	CHI	OUI	OUI	NON	100	2	OUI	OUI	OUI	NON	NON	NON	NON	NON	EC	FTIN	1000	80000	130000	MARCHE	OUI	OUI	OUI	NON	HER	NSS	2	20000	TE	OUI	NON
MARTAP	196	M	47	SEC	MA	10	HE	VE	10	15	15	CUPU	BR	SD	31250	80	40	TRA	CHI	OUI	NON	NON	150	1	NON	OUI	OUI	NON	NON	NON	NON	NON	AO	IN	3000	100000	360000	MARCHE	OUI	OUI	NON	NON	HER	NSS	3	30000	TE	OUI	NON
MARTAP	197	M	50	PFO	MA	15	DO	COVE	3	5	5	CUPU	BR	SD	31250	80	40	TRA	CHI	OUI	NON	NON	200	2	NON	OUI	OUI	NON	NON	NON	NON	NON	AUT	IN	3000	120000	300000	MARCHE	OUI	OUI	NON	NON	HER	NSS	2	25000	TE	OUI	NON
MARTAP	198	M	48	PRI	MA	20	DO	COVE	20	50	6	CUPU	BR	SD	31250	80	40	TRA	CHI	OUI	OUI	NON	150	1	NON	OUI	OUI	NON	NON	NON	NON	NON	AO	FI	4000	180000	400000	MARCHE	OUI	OUI	OUI	NON	HER	NSS	2	30000	EF	OUI	NON
MARTAP	199	M	35	PRI	MA	7	DO	COVE	3	3	2	ASSO	DI	LAB	31250	80	40	TRA	CHI	OUI	OUI	NON	250	3	NON	OUI	OUI	NON	NON	NON	NON	NON	EC	FI	3500	200000	350000	MARCHE	OUI	OUI	OUI	NON	HER	NSS	3	50000	TE	OUI	NON
MARTAP	200	M	25	PFO	MA	4	HE	CO	4	2	1.5	CUPU	BR	SD	31250	80	40	TRA	CHI	OUI	OUI	NON	150	2	NON	OUI	OUI	NON	NON	NON	NON	NON	EC	AUT	1000	50000	100000		OUI	OUI	NON	NON	HER	NSS	2	25000	EF	OUI	NON
MARTAP	201	M	28	PRI	MA	18	HE	COVE	10	5	3	CUPU	BR	SD	41666	80	30	TRA	CHI	OUI	OUI	NON	200	2	OUI	OUI	OUI	NON	NON	NON	NON	NON	EC	FTIN	4000	185000	400000	MARCHE	OUI	OUI	OUI	NON	HER	NSS	3	45000	TE	OUI	NON
MARTAP	202	M	65	PFO	MA	32	DO	COVE	25	15	10	CUPU	BR	LS	31250	80	40	TRA	CHI	OUI	OUI	NON	100	2	OUI	OUI	OUI	NON	NON	NON	NON	NON	EC	FTIN	1500	80000	150000	MARCHE	OUI	OUI	NON	NON	HER	NSS	2	24000	EF	OUI	NON
MARTAP	203	M	48	PFO	MA	24	HE	COVE	23	90	8	CUPU	MC	LS	31250	80	40	TRA	CHI	OUI	OUI	NON	150	2	OUI	OUI	OUI	NON	NON	NON	NON	NON	JA	IN	2200	80000	220000	MARCHE	OUI	OUI	NON	NON	HER	NSS	2	18000	ME	OUI	OUI
MARTAP	204	M	51	PRI	MA	12	HE	COVE	20	7	3	CUPU	BR	SD	37000	90	30	TRA	CHI	OUI	NON	NON	100	1	OUI	OUI	OUI	OUI	NON	NON	OUI	NON	AUT	FTIN	2000	50000	200000	MARCHE	OUI	OUI	OUI	NON	HER	NSS	2	18000	EF	OUI	NON
MARTAP	205	M	50	PRI	MA	25	DO	COVE	6	15	7	CUPU	BR	LAB	31250	80	40	TRA	CHI	OUI	OUI	NON	100	2	OUI	OUI	OUI	NON	NON	NON	NON	NON	EC	FTIN	1000	80000	130000	MARCHE	OUI	OUI	OUI	NON	HER	NSS	2	20000	TE	OUI	NON
MARTAP	206	M	48	SEC	MA	8	HE	VE	10	10	10	CUPU	BR	SD	41666	80	30	TRA	CHI	OUI	NON	NON	150	1	NON	OUI	OUI	NON	NON	NON	NON	NON	AO	IN	3000	100000	360000	MARCHE	OUI	OUI	NON	NON	HER	NSS	3	30000	TE	OUI	NON
MARTAP	207	M	52	PFO	MA	11	DO	COVE	5	4	4	CUPU	BR	SD	31250	80	40	TRA	CHI	OUI	NON	NON	200	2	NON	OUI	OUI	NON	NON	NON	NON	NON	AUT	IN	3200	150000	320000	MARCHE	OUI	OUI	NON	NON	HER	NSS	2	25000	TE	OUI	NON
MARTAP	208	M	48	PRI	MA	20	DO	COVE	20	50	6	CUPU	BR	SD	31250	80	40	TRA	CHI	OUI	OUI	NON	150	1	NON	OUI	OUI	NON	NON	NON	NON	NON	AO	AUT	4000	180000	400000	MARCHE	OUI	OUI	OUI	NON	HER	NSS	2	30000	EF	OUI	NON
MARTAP	209	M	35	PRI	MA	7	DO	COVE	3	3	2	ASSO	DI	LAB	31250	80	40	TRA	CHI	OUI	OUI	NON	250	3	NON	OUI	OUI	NON	NON	NON	NON	NON	EC	AUT	3500	200000	350000	MARCHE	OUI	OUI	OUI	NON	HER	NSS	3	50000	TE	OUI	NON
MARTAP	210	M	48	PFO	MA	10	DO	COVE	10	25	8	CUPU	BR	SD	50000	80	25	TRA	CHI	OUI	OUI	NON	150	2	NON	OUI	OUI	NON	NON	NON	NON	NON	ROT	IN	2500	700000	250000	MARCHE	OUI	OUI	NON	NON	HER	NSS	2	17000	ME	OUI	OUI
MARTAP	211	M	44	SEC	MA	10	HE	COVE	8	45	30	CUPU	BR	LS	41666	80	30	TRA	CHI	OUI	OUI	NON	200	2	OUI	OUI	OUI	NON	NON	NON	NON	NON	AUT	AUT	2200	120000	220000	MARCHE	OUI	OUI	NON	NON	HER	NSS	2	20000	EF	OUI	OUI
MARTAP	212	M	46	PFO	MA	21	AC	COVE	30	13	8	CUPU	BR	SD	31250	80	40	TRA	CHI	OUI	OUI	NON	200	2	NON	OUI	OUI	NON	NON	NON	NON	NON	AUT	AUT	2500	180000	250000	MARCHE	OUI	OUI	NON	NON	HER	NSS	3	30000	EF	OUI	OUI
MARTAP	213	M	41	PFO	MA	15	HE	COVE	15	17	12	CUPU	BR	SD	41619	70	30	TRA	CHI	OUI	OUI	NON	250	2	NON	OUI	OUI	NON	NON	NON	NON	NON	AUT	AUT	3000	200000	390000	MARCHE	OUI	OUI	OUI	NON	HER	NSS	3	40000	TE	OUI	NON
MARTAP	214	M	29	PFO	MA	6	DO	COVE	7	2	1	CUPU	MC	SD	41666	80	30	TRA	CHI	OUI	OUI	NON	200	2	NON	OUI	OUI	NON	NON	NON	NON	NON	EC	AUT	3000	150000	300000	MARCHE	OUI	OUI	NON	NON	HER	NSS	3	40000	TE	OUI	NON
MARTAP	215	M	24	PFO	MA	3	HE	CO	4	2	1	CUPU	BR	SD	31250	80	40	TRA	CHI	OUI	NON	NON	100	1	NON	OUI	OUI	NON	NON	NON	NON	NON	EC	AUT	1000	50000	100000		OUI	OUI	NON	NON	HER	NSS	2	25000	EF	OUI	NON
MARTAP	216	M	26	PRI	MA	14	HE	COVE	8	5	2	CUPU	BR	SD	41666	80	30	TRA	CHI	OUI	OUI	NON	200	2	OUI	OUI	OUI	NON	NON	NON	NON	NON	EC	FTIN	4000	185000	400000	MARCHE	OUI	OUI	OUI	NON	HER	NSS	3	45000	TE	OUI	NON
MARTAP	217	M	68	PFO	MA	32	DO	COVE	25	16	12	CUPU	BR	LS	41666	80	30	TRA	CHI	OUI	OUI	NON	100	2	OUI	OUI	OUI	NON	NON	NON	NON	NON	EC	FTIN	1500	80000	150000	MARCHE	OUI	OUI	NON	NON	HER	NSS	2	24000	EF	OUI	NON
MARTAP	218	M	52	PFO	MA	24	HE	COVE	25	80	12	CUPU	MC	LS	37000	90	30	TRA	CHI	OUI	NON	NON	100	1	OUI	OUI	OUI	NON	NON	NON	NON	NON	AUT	FTIN	2000	70000	200000	MARCHE	OUI	OUI	OUI	NON	HER	NSS	2	15000	ME	OUI	OUI
MARTAP	219	M	55	PRI	MA	12	HE	COVE	18	7	3	CUPU	MC	SD	37000	90	30	TRA	CHI	OUI	NON	NON	100	1	OUI	OUI	OUI	OUI	NON	NON	OUI	NON	EC	FTIN	2000	50000	200000	MARCHE	OUI	OUI	OUI	NON	HER	NSS	2	18000	EF	OUI	NON
MARTAP	220	M	51	PRI	MA	22	DO	COVE	8	12	6	CUPU	BR	LAB	31250	80	40	TRA	CHI	OUI	OUI	NON	100	2	OUI	OUI	OUI	NON	NON	NON	NON	NON	EC	FTIN	1000	80000	130000	MARCHE	OUI	OUI	OUI	NON	HER	NSS	2	20000	TE	OUI	NON
MARTAP	221	M	47	SEC	MA	10	HE	VE	10	15	15	CUPU	BR	SD	31250	80	40	TRA	CHI	OUI	NON	NON	150	1	NON	OUI	OUI	NON	NON	NON	NON	NON	AO	IN	3000	100000	360000	MARCHE	OUI	OUI	NON	NON	HER	NSS	3	30000	TE	OUI	NON
MARTAP	222	M	50	PFO	MA	15	DO	COVE	3	5	5	CUPU	BR	SD	31250	80	40	TRA	CHI	OUI	NON	NON	200	2	NON	OUI	OUI	NON	NON	NON	NON	NON	AUT	IN	3000	120000	300000	MARCHE	OUI	OUI	NON	NON	HER	NSS	2	25000	TE	OUI	NON
MARTAP	223	M	49	PRI	MA	19	DO	COVE	18	45	5	CUPU	BR	SD	31250	80	40	TRA	CHI	OUI	OUI	NON	150	1	NON	OUI	OUI	NON	NON	NON	NON	NON	AO	FI	4000	180000	400000	MARCHE	OUI	OUI	OUI	NON	HER	NSS	2	30000	EF	OUI	NON
MARTAP	224	M	36	PRI	MA	8	DO	COVE	7	5	3	ASSO	DI	LAB	31250	80	40	TRA	CHI	OUI	OUI	NON	250	3	NON	OUI	OUI	NON	NON	NON	NON	NON	EC	FI	3500	200000	350000	MARCHE	OUI	OUI	OUI	NON	HER	NSS	3	50000	TE	OUI	NON
MARTAP	225	M	24	PFO	MA	5	HE	CO	5	3	1.5	CUPU	BR	SD	31250	80	40	TRA	CHI	OUI	OUI	NON	150	2	NON	OUI	OUI	NON	NON	NON	NON	NON	EC	FI	1000	50000	100000		OUI	OUI	NON	NON	HER	NSS	2	25000	EF	OUI	NON
MARTAP	226	M	27	PRI	MA	17	HE	COVE	12	6	4	CUPU	BR	SD	41666	80	30	TRA	CHI	OUI	OUI	NON	200	2	OUI	OUI	OUI	NON	NON	NON	NON	NON	EC	FTIN	4000	185000	400000	MARCHE	OUI	OUI	OUI	NON	HER	NSS	3	45000	TE	OUI	NON
MARTAP	227	M	64	PFO	MA	30	DO	COVE	20	12	6	CUPU	BR	LS	31250	80	40	TRA	CHI	OUI	OUI	NON	100	2	OUI	OUI	OUI	NON	NON	NON	NON	NON	EC	FTIN	1500	80000	150000	MARCHE	OUI	OUI	NON	NON	HER	NSS	2	24000	EF	OUI	NON
MARTAP	228	M	49	PFO	MA	25	HE	COVE	25	70	8	CUPU	MC	LS	31250	80	40	TRA	CHI	OUI	OUI	NON	150	2	OUI	OUI	OUI	NON	NON	NON	NON	NON	JA	IN	2200	80000	220000	MARCHE	OUI	OUI	NON	NON	HER	NSS	2	18000	ME	OUI	OUI
MARTAP	229	M	53	PRI	MA	15	HE	COVE	15	10	4	CUPU	BR	SD	37000	90	30	TRA	CHI	OUI	NON	NON	100	1	OUI	OUI	OUI	OUI	NON	NON	OUI	NON	AUT	FTIN	2000	50000	200000	MARCHE	OUI	OUI	OUI	NON	HER	NSS	2	18000	EF	OUI	NON
MARTAP	230	M	48	PFO	MA	12	DO	COVE	12	15	8	CUPU	BR	SD	80000	50	25	TRA	CHI	OUI	NON	NON	50	1	NON	OUI	OUI	NON	NON	NON	NON	NON	JA	IN	2200	50000	264000	MARCHE	OUI	OUI	OUI	NON	HER	NSS	2	17000	ME	OUI	OUI
MARTAP	231	M	48	SEC	MA	8	HE	COVE	11	40	30	CUPU	BR	LS	41666	80	30	TRA	CHI	OUI	OUI	NON	150	2	OUI	OUI	OUI	NON	NON	NON	NON	NON	AUT	AUT	2000	100000	200000	MARCHE	OUI	OUI	NON	NON	HER	NSS	2	20000	EF	OUI	OUI
MARTAP	232	M	45	PFO	MA	19	AC	COVE	25	10	6	CUPU	BR	SD	41666	80	30	TRA	CHI	OUI	OUI	NON	150	2	NON	OUI	OUI	NON	NON	NON	NON	NON	AUT	AUT	2500	180000	250000	MARCHE	OUI	OUI	NON	NON	HER	NSS	3	30000	EF	OUI	OUI
MARTAP	233	M	43	PFO	MA	22	HE	COVE	18	22	10	CUPU	BR	SD	41619	70	30	TRA	CHI	OUI	OUI	NON	250	2	NON	OUI	OUI	NON	NON	NON	NON	NON	AUT	AUT	3000	200000	390000	MARCHE	OUI	OUI	OUI	NON	HER	NSS	3	40000	TE	OUI	NON
MARTAP	234	M	29	PFO	MA	7	DO	COVE	5	1	1	CUPU	MC	SD	31250	80	40	TRA	CHI	OUI	OUI	NON	200	2	NON	OUI	OUI	NON	NON	NON	NON	NON	EC	AUT	3000	150000	300000	MARCHE	OUI	OUI	NON	NON	HER	NSS	3	40000	TE	OUI	NON
MARTAP	235	M	24	PFO	MA	4	HE	CO	7	2	2	CUPU	BR	SD	31250	80	40	TRA	CHI	OUI	NON	NON	100	1	NON	OUI	OUI	NON	NON	NON	NON	NON	EC	AUT	1000	50000	100000		OUI	OUI	NON	NON	HER	NSS	2	25000	EF	OUI	NON
MARTAP	236	M	25	PRI	MA	23	HE	COVE	12	8	4	CUPU	BR	SD	41666	80	30	TRA	CHI	OUI	OUI	NON	200	2	OUI	OUI	OUI	NON	NON	NON	NON	NON	EC	FTIN	4000	185000	400000	MARCHE	OUI	OUI	OUI	NON	HER	NSS	3	45000	TE	OUI	NON
MARTAP	237	M	68	PFO	MA	36	DO	COVE	25	18	20	CUPU	BR	LS	41666	80	30	TRA	CHI	OUI	OUI	NON	100	2	OUI	OUI	OUI	NON	NON	NON	NON	NON	EC	FTIN	1500	80000	150000	MARCHE	OUI	OUI	NON	NON	HER	NSS	2	24000	EF	OUI	NON
MARTAP	238	M	52	PFO	MA	32	HE	COVE	22	80	10	CUPU	MC	LS	37000	90	30	TRA	CHI	OUI	NON	NON	100	1	OUI	OUI	OUI	NON	NON	NON	NON	NON	AUT	FTIN	2000	70000	200000	MARCHE	OUI	OUI	OUI	NON	HER	NSS	2	15000	ME	OUI	OUI
MARTAP	239	M	55	PRI	MA	24	HE	COVE	20	6	4	CUPU	MC	SD	37000	90	30	TRA	CHI	OUI	NON	NON	100	1	OUI	OUI	OUI	OUI	NON	NON	OUI	NON	ROT	FTIN	2000	50000	200000	MARCHE	OUI	OUI	OUI	NON	HER	NSS	2	18000	EF	OUI	NON
MARTAP	240	M	51	PRI	MA	20	DO	COVE	6	15	7	CUPU	BR	LAB	31250	80	40	TRA	CHI	OUI	OUI	NON	100	2	OUI	OUI	OUI	NON	NON	NON	NON	NON	EC	FTIN	1000	80000	130000	MARCHE	OUI	OUI	OUI	NON	HER	NSS	2	20000	TE	OUI	NON
MARTAP	241	M	48	SEC	MA	10	HE	VE	10	15	15	CUPU	BR	SD	31250	80	40	TRA	CHI	OUI	NON	NON	150	1	NON	OUI	OUI	NON	NON	NON	NON	NON	AO	IN	3000	100000	360000	MARCHE	OUI	OUI	NON	NON	HER	NSS	3	30000	TE	OUI	NON
MARTAP	242	M	51	PFO	MA	12	DO	COVE	4	7	4	CUPU	BR	SD	31250	80	40	TRA	CHI	OUI	NON	NON	200	2	NON	OUI	OUI	NON	NON	NON	NON	NON	AUT	IN	3000	120000	300000	MARCHE	OUI	OUI	NON	NON	HER	NSS	2	25000	TE	OUI	NON
MARTAP	243	M	49	PRI	MA	16	DO	COVE	20	40	7	CUPU	BR	SD	31250	80	40	TRA	CHI	OUI	OUI	NON	150	1	NON	OUI	OUI	NON	NON	NON	NON	NON	AO	AUT	4000	180000	400000	MARCHE	OUI	OUI	OUI	NON	HER	NSS	2	30000	EF	OUI	NON
MARTAP	244	M	36	PRI	MA	10	DO	COVE	3	4	2	ASSO	DI	LAB	31250	80	40	TRA	CHI	OUI	OUI	NON	250	3	NON	OUI	OUI	NON	NON	NON	NON	NON	EC	AUT	3500	200000	350000	MARCHE	OUI	OUI	OUI	NON	HER	NSS	3	50000	TE	OUI	NON
MARTAP	245	M	26	PFO	MA	8	HE	CO	5	3	1.5	CUPU	BR	SD	31250	80	40	TRA	CHI	OUI	OUI	NON	150	2	NON	OUI	OUI	NON	NON	NON	NON	NON	EC	AUT	1000	50000	100000		OUI	OUI	NON	NON	HER	NSS	2	25000	EF	OUI	NON
MARTAP	246	M	29	PRI	MA	20	HE	COVE	10	6	4	CUPU	BR	SD	41666	80	30	TRA	CHI	OUI	OUI	NON	200	2	OUI	OUI	OUI	NON	NON	NON	NON	NON	EC	FTIN	4000	185000	400000	MARCHE	OUI	OUI	OUI	NON	HER	NSS	3	45000	TE	OUI	NON
MARTAP	247	M	66	PFO	MA	30	DO	COVE	25	12	8	CUPU	BR	LS	31250	80	40	TRA	CHI	OUI	OUI	NON	100	2	OUI	OUI	OUI	NON	NON	NON	NON	NON	EC	FTIN	1500	80000	150000	MARCHE	OUI	OUI	NON	NON	HER	NSS	2	24000	EF	OUI	NON
MARTAP	248	M	49	PFO	MA	22	HE	COVE	23	50	7	CUPU	MC	LS	31250	80	40	TRA	CHI	OUI	OUI	NON	150	2	OUI	OUI	OUI	NON	NON	NON	NON	NON	JA	IN	2200	80000	220000	MARCHE	OUI	OUI	NON	NON	HER	NSS	2	18000	ME	OUI	OUI
MARTAP	249	M	52	PRI	MA	10	HE	COVE	20	10	5	CUPU	BR	SD	37000	90	30	TRA	CHI	OUI	NON	NON	100	1	OUI	OUI	OUI	OUI	NON	NON	OUI	NON	AUT	FTIN	2000	50000	200000	MARCHE	OUI	OUI	OUI	NON	HER	NSS	2	18000	EF	OUI	NON
MARTAP	250	M	51	PRI	MA	21	DO	COVE	8	12	8	CUPU	BR	LAB	31250	80	40	TRA	CHI	OUI	OUI	NON	100	2	OUI	OUI	OUI	NON	NON	NON	NON	NON	EC	FTIN	1000	80000	130000	MARCHE	OUI	OUI	OUI	NON	HER	NSS	2	20000	TE	OUI	NON
MARTAP	251	M	49	SEC	MA	10	HE	VE	10	10	10	CUPU	BR	SD	41666	80	30	TRA	CHI	OUI	NON	NON	150	1	NON	OUI	OUI	NON	NON	NON	NON	NON	AO	IN	3000	100000	360000	MARCHE	OUI	OUI	NON	NON	HER	NSS	3	30000	TE	OUI	NON
MARTAP	252	M	53	PFO	MA	13	DO	COVE	5	4	4	CUPU	BR	SD	31250	80	40	TRA	CHI	OUI	NON	NON	200	2	NON	OUI	OUI	NON	NON	NON	NON	NON	AUT	IN	3200	150000	320000	MARCHE	OUI	OUI	NON	NON	HER	NSS	2	25000	TE	OUI	NON
MARTAP	253	M	49	PRI	MA	22	DO	COVE	20	50	6	CUPU	BR	SD	31250	80	40	TRA	CHI	OUI	OUI	NON	150	1	NON	OUI	OUI	NON	NON	NON	NON	NON	AO	FI	4000	180000	400000	MARCHE	OUI	OUI	OUI	NON	HER	NSS	2	30000	EF	OUI	NON
MARTAP	254	M	36	PRI	MA	8	DO	COVE	3	3	2	ASSO	DI	LAB	31250	80	40	TRA	CHI	OUI	OUI	NON	250	3	NON	OUI	OUI	NON	NON	NON	NON	NON	EC	FI	3500	200000	350000	MARCHE	OUI	OUI	OUI	NON	HER	NSS	3	50000	EF	OUI	NON
MARTAP	255	M	49	PFO	MA	10	DO	COVE	10	25	8	CUPU	BR	SD	50000	80	25	TRA	CHI	OUI	OUI	NON	150	2	NON	OUI	OUI	NON	NON	NON	NON	NON	ROT	IN	2500	700000	250000	MARCHE	OUI	OUI	OUI	NON	HER	NSS	2	17000	ME	OUI	OUI
MARTAP	256	M	45	SEC	MA	12	HE	COVE	8	45	30	CUPU	BR	LS	41666	80	30	TRA	CHI	OUI	OUI	NON	200	2	OUI	OUI	OUI	NON	NON	NON	NON	NON	AUT	AUT	2200	120000	220000	MARCHE	OUI	OUI	OUI	NON	HER	NSS	2	20000	EF	OUI	OUI
MARTAP	257	M	47	PFO	MA	20	AC	COVE	30	13	8	CUPU	BR	SD	31250	80	40	TRA	CHI	OUI	OUI	NON	200	2	OUI	OUI	OUI	NON	NON	NON	NON	NON	AUT	FI	2500	180000	250000	MARCHE	OUI	OUI	OUI	NON	HER	NSS	3	30000	EF	OUI	OUI
MARTAP	258	M	42	PFO	MA	16	HE	COVE	15	17	12	CUPU	BR	SD	41619	70	30	TRA	CHI	OUI	OUI	NON	250	2	OUI	OUI	OUI	NON	NON	NON	NON	NON	AUT	FI	3000	200000	390000	MARCHE	OUI	OUI	OUI	NON	HER	NSS	3	40000	TE	OUI	NON
MARTAP	259	M	30	PFO	MA	8	DO	COVE	7	2	1	CUPU	MC	SD	41666	80	30	TRA	CHI	OUI	OUI	NON	200	2	OUI	OUI	OUI	NON	NON	NON	NON	NON	EC	FI	3000	150000	300000	MARCHE	OUI	OUI	NON	NON	HER	NSS	3	40000	TE	OUI	NON
MARTAP	260	M	25	PFO	MA	4	HE	CO	4	2	1	CUPU	BR	SD	31250	80	40	TRA	CHI	OUI	NON	NON	100	1	OUI	OUI	OUI	NON	NON	NON	NON	NON	EC	FI	1000	50000	100000		OUI	OUI	NON	NON	HER	NSS	2	25000	EF	OUI	NON
MARTAP	261	M	27	PRI	MA	16	HE	COVE	8	5	2	CUPU	BR	SD	41666	80	30	TRA	CHI	OUI	OUI	NON	200	2	OUI	OUI	OUI	NON	NON	NON	NON	NON	EC	FTIN	4000	185000	400000	MARCHE	OUI	OUI	OUI	NON	HER	NSS	3	45000	TE	OUI	NON
MARTAP	262	M	67	PFO	MA	28	DO	COVE	25	16	12	CUPU	BR	LS	41666	80	30	TRA	CHI	OUI	OUI	NON	100	2	OUI	OUI	OUI	NON	NON	NON	NON	NON	EC	FTIN	1500	80000	150000	MARCHE	OUI	OUI	NON	NON	HER	NSS	2	24000	EF	OUI	NON
MARTAP	263	M	53	PFO	MA	22	HE	COVE	20	60	10	CUPU	MC	LS	37000	90	30	TRA	CHI	OUI	NON	NON	100	1	OUI	OUI	OUI	NON	NON	NON	NON	NON	AUT	FTIN	2000	70000	200000	MARCHE	OUI	OUI	OUI	NON	HER	NSS	2	15000	ME	OUI	OUI
MARTAP	264	M	56	PRI	MA	14	HE	COVE	16	8	4	CUPU	MC	SD	37000	90	30	TRA	CHI	OUI	NON	NON	100	1	OUI	OUI	OUI	OUI	NON	NON	OUI	NON	ROT	FTIN	2000	50000	200000	MARCHE	OUI	OUI	OUI	NON	HER	NSS	2	18000	EF	OUI	NON
MARTAP	265	M	50	PRI	MA	21	DO	COVE	9	15	7	CUPU	BR	LAB	31250	80	40	TRA	CHI	OUI	OUI	NON	100	2	OUI	OUI	OUI	NON	NON	NON	NON	NON	EC	FTIN	1000	80000	130000	MARCHE	OUI	OUI	OUI	NON	HER	NSS	2	20000	TE	OUI	NON
MARTAP	266	M	46	SEC	MA	12	HE	VE	10	14	14	CUPU	BR	SD	31250	80	40	TRA	CHI	OUI	NON	NON	150	1	NON	OUI	OUI	NON	NON	NON	NON	NON	AO	IN	3000	100000	360000	MARCHE	OUI	OUI	NON	NON	HER	NSS	3	30000	TE	OUI	NON
MARTAP	267	M	30	PRI	MA	16	HE	COVE	12	7	5	CUPU	BR	SD	41666	80	30	TRA	CHI	OUI	OUI	NON	200	2	OUI	OUI	OUI	NON	NON	NON	NON	NON	EC	FTIN	4000	185000	400000	MARCHE	OUI	OUI	OUI	NON	HER	NSS	3	45000	TE	OUI	NON
MARTAP	268	M	66	PFO	MA	30	DO	COVE	20	10	6	CUPU	BR	LS	31250	80	40	TRA	CHI	OUI	OUI	NON	100	2	OUI	OUI	OUI	NON	NON	NON	NON	NON	EC	FTIN	1500	80000	150000	MARCHE	OUI	OUI	NON	NON	HER	NSS	2	24000	EF	OUI	NON
MARTAP	269	M	49	PFO	MA	22	HE	COVE	20	30	5	CUPU	MC	LS	31250	80	40	TRA	CHI	OUI	OUI	NON	150	2	OUI	OUI	OUI	NON	NON	NON	NON	NON	JA	IN	2200	80000	220000	MARCHE	OUI	OUI	NON	NON	HER	NSS	2	18000	ME	OUI	OUI
MARTAP	270	M	52	PRI	MA	10	HE	COVE	15	7	4	CUPU	BR	SD	37000	90	30	TRA	CHI	OUI	NON	NON	100	1	OUI	OUI	OUI	OUI	NON	NON	OUI	NON	AUT	FTIN	2000	50000	200000	MARCHE	OUI	OUI	OUI	NON	HER	NSS	2	18000	EF	OUI	NON
MARTAP	271	M	51	PRI	MA	21	DO	COVE	10	15	10	CUPU	BR	LAB	31250	80	40	TRA	CHI	OUI	OUI	NON	100	2	OUI	OUI	OUI	NON	NON	NON	NON	NON	EC	FTIN	1000	80000	130000	MARCHE	OUI	OUI	OUI	NON	HER	NSS	2	20000	TE	OUI	NON
NDERE III	272	M	57	PFO	MA	12	HE	COVE	12	10	3	CUPU	BR	LAB	41666	80	30	TRA	CHI	OUI	OUI	NON	150	2	NON	OUI	OUI	NON	NON	NON	NON	NON	ROT	IN	2500	130000	250000	MARCHE	OUI	OUI	OUI	NON	HER	SE	2	30000	ME	NON	OUI
NDERE III	273	M	42	PRI	MA	7	HE	VE	15	15	5	CUPU	BR	LAB	41666	80	30	TRA	CHI	OUI	OUI	NON	200	2	OUI	OUI	NON	NON	NON	NON	NON	OUI	AO	IN	3000	150000	300000	MARCHE	OUI	OUI	NON	NON	HER	SE	2	25000	ME	NON	OUI
NDERE III	274	M	36	PFO	MA	6	HE	COVE	10	5	2	CUPU	ML	LAB	31250	80	40	TRA	CHI	OUI	OUI	NON	200	2	OUI	OUI	NON	NON	NON	NON	NON	NON	ROT	IN	3200	180000	320000	MARCHE	OUI	OUI	NON	NON	HER	SE	2	25000	ME	NON	OUI
NDERE III	275	M	34	SEC	MA	14	DO	COVE	8	6	2.5	CUPU	MC	LAB	50000	80	25	AME	CHI	OUI	NON	NON	100	1	NON	OUI	OUI	NON	NON	NON	NON	NON	AUT	IN	2000	100000	300000	MARCHE	OUI	OUI	OUI	NON	HER	SE	1	15000	EF	NON	OUI
NDERE III	276	M	45	PRI	MA	8	AC	COVE	20	12	5	CUPU	MC	LAB	31250	80	40	AME	CHI	OUI	OUI	NON	200	2	OUI	OUI	OUI	NON	NON	NON	NON	OUI	AO	AUT	2400	150000	288000	MARCHE	OUI	OUI	NON	NON	HER	SE	2	20000	ME	NON	OUI
NDERE III	277	M	32	PFO	CE	7	HE	COVE	5	4	2	CUPU	ML	SD	41666	80	30	AME	ORGMIN	OUI	NON	OUI	150	2	OUI	OUI	OUI	NON	NON	NON	NON	NON	AO	IN	3000	180000	360000	MARCHE	OUI	OUI	OUI	NON	HER	NSS	4	60000	EF	OUI	OUI
NDERE III	278	M	48	PFO	MA	10	HE	COVE	17	20	5	CUPU	BR	LAB	31250	80	40	AME	ORGMIN	OUI	NON	OUI	100	2	OUI	OUI	NON	NON	NON	NON	NON	OUI	ROT	FTIN	2200	120000	220000	MARCHE	OUI	OUI	OUI	NON	DM	HOUES	2	28000	EF	NON	NON
NDERE III	279	M	57	PRI	MA	6	AC	COVE	12	7	3.5	CUPU	BR	LAB	31250	80	40	TRA	CHI	OUI	OUI	NON	200	2	OUI	OUI	OUI	NON	NON	NON	NON	NON	AUT	FTIN	2800	150000	336000	MARCHE	OUI	OUI	NON	NON	HER	NSS	3	35000	EF	OUI	OUI
NDERE III	280	M	62	PRI	MA	18	HE	COVE	25	5	2	CUPU	ML	SD	41666	80	30	TRA	CHI	OUI	OUI	NON	150	2	NON	OUI	OUI	NON	NON	NON	NON	NON	ROT	IN	2000	100000	200000	MARCHE	OUI	OUI	OUI	NON	HER	NSS	3	30000	EF	OUI	OUI
NDERE III	281	M	57	SEC	MA	16	HE	COVE	15	12	4	CUPU	BR	LAB	37000	90	30	AME	CHI	OUI	OUI	NON	200	2	OUI	OUI	NON	NON	NON	NON	NON	OUI	EC	IN	3000	180000	360000	MARCHE	OUI	OUI	OUI	NON	HER	NSS	3	40000	ME	OUI	OUI
NDERE III	282	M	36	SEC	MA	9	DO	COVE	6	2	1	CUPU	BR	LAB	31250	80	40	AME	CHI	OUI	OUI	NON	100	1	OUI	OUI	OUI	NON	NON	NON	NON	OUI	EC	AUT	2200	150000	220000	MARCHE	OUI	OUI	NON	NON	HER	SE	2	30000	ME	NON	OUI
NDERE III	283	M	39	SEC	MA	17	DO	CO	7	1	1	CUPU	BR	LAB	31250	80	40	AME	CHI	NON	NON	OUI	300	1	OUI	OUI	NON	NON	NON	NON	NON	NON	AO	IN	1500	80000	150000		OUI	OUI	NON	NON	DMHE	SE	1	10000	PE	OUI	OUI
NDERE III	284	M	45	PRI	MA	8	HE	COVE	20	10	3	CUPU	BR	LS	41666	80	30	AME	CHI	OUI	OUI	NON	200	2	NON	OUI	OUI	NON	NON	NON	NON	NON	ROT	FTIN	2000	100000	200000	MARCHE	OUI	OUI	OUI	NON	DMHE	NSS	3	25000	EF	OUI	OUI
NDERE III	285	M	57	PRI	MA	12	HE	COVE	25	7	5	CUPU	BR	LS	50000	80	25	AME	CHI	OUI	OUI	NON	200	2	OUI	OUI	OUI	NON	NON	NON	NON	NON	AUT	FTIN	2500	120000	250000	MARCHE	OUI	OUI	OUI	NON	HER	NSS	3	35000	ME	NON	OUI
NDERE III	286	F	36	PFO	MA	10	AC	COVE	10	3	1.5	ASSO	BR	LAB	31250	80	40	TRA	ORGMIN	OUI	NON	OUI	150	2	OUI	OUI	NON	NON	NON	NON	NON	NON	ROT	AUT	2200	100000	220000		OUI	OUI	NON	NON	HER	SE	1	12000	PE	NON	OUI
NDERE III	287	M	56	PRI	MA	15	HE	COVE	20	8	4	CUPU	MC	SD	41666	80	30	TRA	CHI	OUI	OUI	NON	150	2	NON	OUI	OUI	NON	NON	NON	NON	NON	ROT	IN	2000	110000	200000	MARCHE	OUI	OUI	OUI	NON	HER	NSS	2	30000	ME	NON	OUI
NDERE III	288	M	41	PRI	MA	12	HE	COVE	12	10	3	CUPU	BR	LAB	41666	80	30	TRA	CHI	OUI	OUI	NON	150	2	NON	OUI	OUI	NON	NON	NON	NON	NON	ROT	IN	2500	130000	250000	MARCHE	OUI	OUI	OUI	NON	HER	SE	2	25000	ME	NON	OUI
NDERE III	289	M	54	SEC	MA	21	DO	COVE	25	15	6	CUPU	BR	SD	31250	80	40	AME	CHI	OUI	OUI	NON	200	2	OUI	OUI	NON	NON	NON	NON	NON	OUI	AUT	FI	2800	180000	280000	MARCHE	OUI	OUI	NON	NON	HER	NSS	3	40000	EF	OUI	OUI
NDERE III	290	M	29	SEC	CE	8	HE	COVE	12	5	2	CUPU	BR	LAB	41666	80	30	AME	ORGMIN	OUI	NON	OUI	150	2	OUI	OUI	OUI	NON	NON	NON	NON	NON	AO	FI	3000	150000	360000	MARCHE	OUI	OUI	OUI	NON	HER	NSS	2	25000	EF	OUI	OUI
NDERE III	291	M	58	PRI	MA	18	HE	COVE	25	30	10	CUPU	BR	LAB	50000	80	25	AME	CHI	OUI	OUI	NON	250	3	NON	OUI	OUI	NON	NON	NON	NON	OUI	AUT	IN	3400	200000	408000	MARCHE	OUI	OUI	OUI	NON	HER	NSS	2	20000	ME	OUI	OUI
NDERE III	292	M	40	PFO	MA	13	HE	COVE	12	10	3	CUPU	BR	LAB	41666	80	30	AME	CHI	OUI	OUI	NON	200	2	NON	OUI	OUI	NON	NON	NON	NON	NON	ROT	IN	2500	90000	250000	MARCHE	OUI	OUI	NON	NON	HER	NSS	3	30000	ME	NON	OUI
NDERE III	293	M	55	PFO	MA	21	HE	COVE	20	25	5	CUPU	MC	LAB	31250	80	40	AME	CHI	OUI	OUI	NON	200	2	OUI	OUI	OUI	NON	NON	NON	NON	NON	ROT	IN	2600	150000	260000	MARCHE	OUI	OUI	NON	NON	HER	NSS	3	35000	ME	OUI	OUI
NDERE III	294	M	62	PRI	MA	14	HE	COVE	25	12	7.5	CUPU	MC	SD	50000	80	25	TRA	CHI	OUI	OUI	NON	150	1	OUI	OUI	NON	NON	NON	NON	NON	NON	AUT	FTIN	2400	150000	240000	MARCHE	OUI	OUI	OUI	NON	HER	NSS	3	35000	EF	OUI	OUI
NDERE III	295	M	57	PFO	MA	12	HE	COVE	12	10	3	CUPU	BR	LAB	41666	80	30	TRA	CHI	OUI	OUI	NON	200	2	NON	OUI	OUI	NON	NON	NON	NON	NON	ROT	IN	2000	110000	200000	MARCHE	OUI	OUI	OUI	NON	HER	SE	2	20000	ME	OUI	OUI
NDERE III	296	M	28	SEC	CE	20	DO	COVE	3	4	2	CUPU	ML	SD	31250	80	40	AME	ORGMIN	OUI	NON	OUI	100	2	NON	OUI	OUI	NON	NON	NON	NON	OUI	AO	IN	1500	80000	150000	MARCHE	OUI	OUI	NON	NON	HER	NSS	2	18000	PE	OUI	OUI
NDERE III	297	F	28	PRI	MA	6	AC	CO	4	3	1.5	ASSO	BR	LAB	31250	80	40	AME	ORG	NON	NON	OUI	200	1	OUI	OUI	OUI	NON	NON	NON	NON	NON	AO	FTIN	1200	50000	120000		OUI	OUI	OUI	NON	HER	SE	2	30000	ME	NON	OUI
NDERE III	298	M	46	PRI	MA	9	HE	COVE	15	7	4	CUPU	BR	SD	41666	80	30	AME	CHI	OUI	OUI	NON	200	2	NON	OUI	OUI	NON	NON	NON	NON	NON	AUT	IN	3000	180000	300000	MARCHE	OUI	OUI	OUI	NON	HER	NSS	3	40000	ME	NON	OUI
NDERE III	299	M	45	PRI	MA	9	AC	COVE	15	7	4	CUPU	BR	LAB	50000	80	25	TRA	CHI	OUI	OUI	NON	200	2	NON	OUI	OUI	NON	NON	NON	NON	NON	ROT	IN	2800	160000	280000	MARCHE	OUI	OUI	NON	NON	HER	SE	2	20000	ME	OUI	OUI
NDERE III	300	M	61	PFO	MA	18	HE	COVE	12	10	3	CUPU	BR	LAB	41666	80	30	TRA	CHI	OUI	OUI	NON	150	2	NON	OUI	OUI	NON	NON	NON	NON	NON	ROT	IN	2500	130000	250000	MARCHE	OUI	OUI	OUI	NON	HER	SE	2	30000	ME	NON	OUI
NDERE III	301	M	54	PRI	MA	7	HE	COVE	13	12	5	CUPU	BR	LAB	31250	80	40	AME	ORGMIN	OUI	NON	OUI	100	2	OUI	OUI	NON	NON	NON	NON	NON	NON	AO	IN	2000	110000	200000	MARCHE	OUI	OUI	NON	NON	HER	NSS	2	20000	ME	NON	OUI
NDERE III	302	M	57	PFO	MA	12	HE	COVE	10	8	2	CUPU	BR	LAB	41666	80	30	TRA	CHI	OUI	OUI	NON	150	2	NON	OUI	OUI	NON	NON	NON	NON	NON	ROT	IN	2500	130000	250000	MARCHE	OUI	OUI	OUI	NON	HER	SE	2	30000	ME	NON	OUI
NDERE III	303	M	42	PRI	MA	7	HE	VE	18	10	5	CUPU	BR	LAB	41666	80	30	TRA	CHI	OUI	OUI	NON	200	2	OUI	OUI	OUI	NON	NON	NON	NON	NON	AO	IN	3000	150000	300000	MARCHE	OUI	OUI	NON	NON	HER	SE	2	25000	ME	NON	OUI
NDERE III	304	M	36	PFO	MA	6	HE	COVE	8	5	3	CUPU	ML	LAB	31250	80	40	TRA	CHI	OUI	OUI	NON	200	2	OUI	OUI	NON	NON	NON	NON	NON	NON	ROT	IN	3200	180000	320000	MARCHE	OUI	OUI	NON	NON	HER	SE	2	25000	ME	NON	OUI
NDERE III	305	M	34	SEC	MA	14	DO	COVE	10	6	2	CUPU	MC	LAB	50000	80	25	AME	CHI	OUI	NON	NON	100	1	NON	OUI	OUI	NON	NON	NON	NON	NON	AUT	IN	2000	100000	300000	MARCHE	OUI	OUI	OUI	NON	HER	SE	1	15000	EF	NON	OUI
NDERE III	306	M	45	PRI	MA	8	AC	COVE	15	10	4	CUPU	MC	LAB	31250	80	40	AME	CHI	OUI	OUI	NON	200	2	OUI	OUI	OUI	NON	NON	NON	NON	OUI	AO	FI	2400	150000	288000	MARCHE	OUI	OUI	NON	NON	HER	SE	2	20000	ME	NON	OUI
NDERE III	307	M	32	PFO	CE	7	HE	COVE	7	5	3	CUPU	ML	SD	41666	80	30	AME	ORGMIN	OUI	NON	OUI	150	2	OUI	OUI	OUI	NON	NON	NON	NON	NON	AO	IN	3000	180000	360000	MARCHE	OUI	OUI	OUI	NON	HER	NSS	4	60000	EF	OUI	OUI
NDERE III	308	M	48	PFO	MA	10	HE	COVE	15	15	2	CUPU	BR	LAB	31250	80	40	AME	ORGMIN	OUI	NON	OUI	100	2	OUI	OUI	NON	NON	NON	NON	NON	OUI	ROT	FTIN	2200	120000	220000	MARCHE	OUI	OUI	OUI	NON	DM	HOUES	2	28000	EF	NON	NON
NDERE III	309	M	57	PRI	MA	6	AC	COVE	15	10	2.5	CUPU	BR	LAB	31250	80	40	TRA	CHI	OUI	OUI	NON	200	2	OUI	OUI	OUI	NON	NON	NON	NON	NON	AUT	FTIN	2800	150000	336000	MARCHE	OUI	OUI	NON	NON	HER	NSS	3	35000	EF	OUI	OUI
NDERE III	310	M	62	PRI	MA	18	HE	COVE	20	6	3	CUPU	ML	SD	41666	80	30	TRA	CHI	OUI	OUI	NON	150	2	NON	OUI	OUI	NON	NON	NON	NON	NON	ROT	IN	2000	100000	200000	MARCHE	OUI	OUI	OUI	NON	HER	NSS	3	30000	EF	OUI	OUI
NDERE III	311	M	57	SEC	MA	16	HE	COVE	17	12	5	CUPU	BR	LAB	37000	90	30	AME	CHI	OUI	OUI	NON	200	2	OUI	OUI	NON	NON	NON	NON	NON	OUI	EC	IN	3000	180000	360000	MARCHE	OUI	OUI	OUI	NON	HER	NSS	3	40000	ME	OUI	OUI
NDERE III	312	M	36	SEC	MA	9	DO	COVE	5	3	1	CUPU	BR	LAB	31250	80	40	AME	CHI	OUI	OUI	NON	100	1	OUI	OUI	OUI	NON	NON	NON	NON	OUI	EC	FI	2200	150000	220000	MARCHE	OUI	OUI	NON	NON	HER	SE	2	30000	ME	NON	OUI
NDERE III	313	M	39	SEC	MA	17	DO	CO	8	1	1	CUPU	BR	LAB	31250	80	40	AME	ORG	NON	NON	OUI	300	1	OUI	OUI	NON	NON	NON	NON	NON	NON	AO	IN	1500	80000	150000		OUI	OUI	NON	NON	DMHE	SE	1	10000	PE	OUI	OUI
NDERE III	314	M	45	PRI	MA	8	HE	COVE	20	10	3	CUPU	BR	LS	41666	80	30	AME	CHI	OUI	OUI	NON	200	2	NON	OUI	OUI	NON	NON	NON	NON	NON	ROT	FTIN	2000	100000	200000	MARCHE	OUI	OUI	OUI	NON	DMHE	NSS	3	25000	EF	OUI	OUI
NDERE III	315	M	57	PRI	MA	12	HE	COVE	25	7	5	CUPU	BR	LS	50000	80	25	AME	CHI	OUI	OUI	NON	200	2	OUI	OUI	OUI	NON	NON	NON	NON	NON	AUT	AUT	2500	120000	250000	MARCHE	OUI	OUI	OUI	NON	HER	NSS	3	35000	ME	NON	OUI
NDERE III	316	F	36	PFO	MA	10	AC	COVE	10	3	1.5	ASSO	BR	LAB	31250	80	40	TRA	ORGMIN	OUI	NON	OUI	150	2	OUI	OUI	NON	NON	NON	NON	NON	NON	ROT	FI	2200	100000	220000		OUI	OUI	NON	NON	HER	SE	1	12000	PE	NON	OUI
NDERE III	317	M	56	PRI	MA	15	HE	COVE	20	8	4	CUPU	MC	SD	41666	80	30	TRA	CHI	OUI	OUI	NON	150	2	NON	OUI	OUI	NON	NON	NON	NON	NON	ROT	IN	2000	110000	200000	MARCHE	OUI	OUI	OUI	NON	HER	NSS	2	30000	ME	NON	OUI
NDERE III	318	M	41	PRI	MA	12	HE	COVE	12	10	3	CUPU	BR	LAB	41666	80	30	TRA	CHI	OUI	OUI	NON	150	2	NON	OUI	OUI	NON	NON	NON	NON	NON	ROT	IN	2500	130000	250000	MARCHE	OUI	OUI	OUI	NON	HER	SE	2	25000	ME	NON	OUI
NDERE III	319	M	54	SEC	MA	21	DO	COVE	25	15	6	CUPU	BR	SD	31250	80	40	AME	CHI	OUI	OUI	NON	200	2	OUI	OUI	NON	NON	NON	NON	NON	OUI	AUT	AUT	2800	180000	280000	MARCHE	OUI	OUI	NON	NON	HER	NSS	3	40000	EF	OUI	OUI
NDERE III	320	M	29	SEC	CE	8	HE	COVE	12	5	2	CUPU	BR	LAB	41666	80	30	AME	ORGMIN	OUI	NON	OUI	150	2	OUI	OUI	OUI	NON	NON	NON	NON	NON	AO	FI	3000	150000	360000	MARCHE	OUI	OUI	OUI	NON	HER	NSS	2	25000	EF	OUI	OUI
NDERE III	321	M	58	PRI	MA	18	HE	COVE	25	30	10	CUPU	BR	LAB	50000	80	25	AME	CHI	OUI	OUI	NON	250	3	NON	OUI	OUI	NON	NON	NON	NON	OUI	AUT	IN	3400	200000	408000	MARCHE	OUI	OUI	OUI	NON	HER	NSS	2	20000	ME	OUI	OUI
NDERE III	322	M	40	PFO	MA	13	HE	COVE	12	10	3	CUPU	BR	LAB	41666	80	30	AME	CHI	OUI	OUI	NON	200	2	NON	OUI	OUI	NON	NON	NON	NON	NON	ROT	IN	2500	90000	250000	MARCHE	OUI	OUI	OUI	NON	HER	NSS	3	30000	ME	NON	OUI
NDERE III	323	M	55	PFO	MA	21	HE	COVE	20	25	5	CUPU	MC	LAB	31250	80	40	AME	CHI	OUI	OUI	NON	200	2	OUI	OUI	OUI	NON	NON	NON	NON	NON	ROT	IN	2600	150000	260000	MARCHE	OUI	OUI	NON	NON	HER	NSS	3	35000	ME	OUI	OUI
NDERE III	324	M	62	PRI	MA	14	HE	COVE	25	12	7.5	CUPU	MC	SD	50000	80	25	TRA	CHI	OUI	OUI	NON	150	1	OUI	OUI	NON	NON	NON	NON	NON	NON	AUT	FTIN	2400	150000	240000	MARCHE	OUI	OUI	OUI	NON	HER	NSS	3	35000	EF	OUI	OUI
NDERE III	325	M	57	PFO	MA	12	HE	COVE	12	10	3	CUPU	BR	LAB	41666	80	30	TRA	CHI	OUI	OUI	NON	200	2	NON	OUI	OUI	NON	NON	NON	NON	NON	ROT	IN	2000	110000	200000	MARCHE	OUI	OUI	OUI	NON	HER	SE	2	20000	ME	OUI	OUI
NDERE III	326	M	28	SEC	CE	20	DO	COVE	3	4	2	CUPU	ML	SD	31250	80	40	AME	ORGMIN	OUI	NON	OUI	100	2	NON	OUI	OUI	NON	NON	NON	NON	OUI	AO	IN	1500	80000	150000	MARCHE	OUI	OUI	NON	NON	HER	NSS	2	18000	PE	OUI	OUI
NDERE III	327	F	28	PRI	MA	6	AC	CO	4	3	1.5	ASSO	BR	LAB	31250	80	40	AME	ORG	NON	NON	OUI	200	1	OUI	OUI	OUI	NON	NON	NON	NON	NON	AO	FTIN	1200	50000	120000		OUI	OUI	OUI	NON	HER	SE	2	30000	ME	NON	OUI
NDERE III	328	M	46	PRI	MA	9	HE	COVE	15	7	4	CUPU	BR	SD	41666	80	30	AME	CHI	OUI	OUI	NON	200	2	NON	OUI	OUI	NON	NON	NON	NON	NON	AUT	IN	3000	180000	300000	MARCHE	OUI	OUI	OUI	NON	HER	NSS	3	40000	ME	NON	OUI
NDERE III	329	M	36	PFO	MA	6	HE	COVE	8	5	3	CUPU	ML	LAB	31250	80	40	TRA	CHI	OUI	OUI	NON	200	2	OUI	OUI	NON	NON	NON	NON	NON	NON	ROT	IN	3200	180000	320000	MARCHE	OUI	OUI	NON	NON	HER	SE	2	25000	ME	NON	OUI
NDERE III	330	M	34	SEC	MA	14	DO	COVE	10	6	2	CUPU	MC	LAB	50000	80	25	AME	CHI	OUI	NON	NON	100	1	NON	OUI	OUI	NON	NON	NON	NON	NON	AUT	IN	2000	100000	300000	MARCHE	OUI	OUI	OUI	NON	HER	SE	1	15000	EF	NON	OUI
NDERE III	331	M	45	PRI	MA	8	AC	COVE	15	10	4	CUPU	MC	LAB	31250	80	40	AME	CHI	OUI	OUI	NON	200	2	OUI	OUI	OUI	NON	NON	NON	NON	OUI	AO	FI	2400	150000	288000	MARCHE	OUI	OUI	NON	NON	HER	SE	2	20000	ME	NON	OUI
NDERE III	332	M	32	PFO	CE	7	HE	COVE	7	5	3	CUPU	ML	SD	41666	80	30	AME	ORGMIN	OUI	NON	OUI	150	2	OUI	OUI	OUI	NON	NON	NON	NON	NON	AO	IN	3000	180000	360000	MARCHE	OUI	OUI	OUI	NON	HER	NSS	4	60000	EF	OUI	OUI
NDERE III	333	M	48	PFO	MA	10	HE	COVE	15	15	2	CUPU	BR	LAB	31250	80	40	AME	ORGMIN	OUI	NON	OUI	100	2	OUI	OUI	OUI	NON	NON	NON	NON	NON	ROT	FTIN	2200	120000	220000	MARCHE	OUI	OUI	OUI	NON	DM	HOUES	2	28000	EF	NON	NON
NDERE III	334	M	57	PRI	MA	6	AC	COVE	15	10	2.5	CUPU	BR	LAB	31250	80	40	TRA	CHI	OUI	OUI	NON	200	2	OUI	OUI	OUI	NON	NON	NON	NON	NON	AUT	FTIN	2800	150000	336000	MARCHE	OUI	OUI	NON	NON	HER	NSS	3	35000	EF	OUI	OUI
NDERE III	335	M	62	PRI	MA	18	HE	COVE	20	6	3	CUPU	ML	SD	41666	80	30	TRA	CHI	OUI	OUI	NON	150	2	NON	OUI	OUI	NON	NON	NON	NON	NON	ROT	IN	2000	100000	200000	MARCHE	OUI	OUI	OUI	NON	HER	NSS	3	30000	EF	OUI	OUI
NDERE III	336	M	57	SEC	MA	16	HE	COVE	17	12	5	CUPU	BR	LAB	37000	90	30	AME	CHI	OUI	OUI	NON	200	2	OUI	OUI	NON	NON	NON	NON	NON	OUI	EC	IN	3000	180000	360000	MARCHE	OUI	OUI	OUI	NON	HER	NSS	3	40000	ME	OUI	OUI
NDERE III	337	M	36	SEC	MA	9	DO	COVE	5	3	1	CUPU	BR	LAB	31250	80	40	AME	CHI	OUI	OUI	NON	100	1	OUI	OUI	OUI	NON	NON	NON	NON	OUI	EC	FI	2200	150000	220000	MARCHE	OUI	OUI	NON	NON	HER	SE	2	30000	ME	NON	OUI
NDERE III	338	M	39	SEC	MA	17	DO	CO	8	1	1	CUPU	BR	LAB	31250	80	40	AME	ORG	NON	NON	OUI	300	1	OUI	OUI	NON	NON	NON	NON	NON	NON	AO	IN	1500	80000	150000		OUI	OUI	NON	NON	DMHE	SE	1	10000	PE	OUI	OUI
NDERE III	339	M	45	PRI	MA	8	HE	COVE	20	10	3	CUPU	BR	LS	41666	80	30	AME	CHI	OUI	OUI	NON	200	2	NON	OUI	OUI	NON	NON	NON	NON	NON	ROT	FTIN	2000	100000	200000	MARCHE	OUI	OUI	OUI	NON	DMHE	NSS	3	25000	EF	OUI	OUI
NDERE III	340	M	58	PRI	MA	12	HE	COVE	25	7	5	CUPU	BR	LS	50000	80	25	AME	CHI	OUI	OUI	NON	200	2	OUI	OUI	OUI	NON	NON	NON	NON	NON	AUT	AUT	2500	120000	250000	MARCHE	OUI	OUI	OUI	NON	HER	NSS	3	35000	ME	NON	OUI
NDERE III	341	F	38	PFO	MA	10	AC	COVE	10	3	1.5	ASSO	BR	LAB	31250	80	40	TRA	ORGMIN	OUI	NON	OUI	150	2	OUI	OUI	NON	NON	NON	NON	NON	NON	ROT	FI	2200	100000	220000		OUI	OUI	NON	NON	HER	SE	1	12000	PE	NON	OUI
NDERE III	342	M	57	PRI	MA	15	HE	COVE	20	8	4	CUPU	MC	SD	41666	80	30	TRA	CHI	OUI	OUI	NON	150	2	NON	OUI	OUI	NON	NON	NON	NON	NON	ROT	IN	2000	110000	200000	MARCHE	OUI	OUI	OUI	NON	HER	NSS	2	30000	ME	NON	OUI
NDERE III	343	M	42	PRI	MA	12	HE	COVE	12	10	3	CUPU	BR	LAB	41666	80	30	TRA	CHI	OUI	OUI	NON	150	2	NON	OUI	OUI	NON	NON	NON	NON	NON	ROT	IN	2500	130000	250000	MARCHE	OUI	OUI	OUI	NON	HER	SE	2	25000	ME	NON	OUI
NDERE III	344	M	55	SEC	MA	21	DO	COVE	25	15	6	CUPU	BR	SD	31250	80	40	AME	CHI	OUI	OUI	NON	200	2	OUI	OUI	NON	NON	NON	NON	NON	OUI	AUT	IN	2800	180000	280000	MARCHE	OUI	OUI	NON	NON	HER	NSS	3	40000	EF	OUI	OUI
NDERE III	345	M	28	SEC	CE	8	HE	COVE	12	5	2	CUPU	BR	LAB	41666	80	30	AME	ORGMIN	OUI	NON	OUI	150	2	OUI	OUI	OUI	NON	NON	NON	NON	NON	AO	FI	3000	150000	360000	MARCHE	OUI	OUI	OUI	NON	HER	NSS	2	25000	EF	OUI	OUI
NDERE III	346	M	59	PRI	MA	18	HE	COVE	25	30	10	CUPU	BR	LAB	50000	80	25	AME	CHI	OUI	OUI	NON	250	3	NON	OUI	OUI	NON	NON	NON	NON	OUI	AUT	IN	3400	200000	408000	MARCHE	OUI	OUI	OUI	NON	HER	NSS	2	20000	ME	OUI	OUI
NDERE III	347	M	42	PFO	MA	13	HE	COVE	12	10	3	CUPU	BR	LAB	41666	80	30	AME	CHI	OUI	OUI	NON	200	2	NON	OUI	OUI	NON	NON	NON	NON	NON	ROT	IN	2500	90000	250000	MARCHE	OUI	OUI	NON	NON	HER	NSS	3	30000	ME	NON	OUI
NDERE III	348	M	52	PFO	MA	21	HE	COVE	20	25	5	CUPU	MC	LAB	31250	80	40	AME	CHI	OUI	OUI	NON	200	2	OUI	OUI	OUI	NON	NON	NON	NON	NON	ROT	IN	2600	150000	260000	MARCHE	OUI	OUI	NON	NON	HER	NSS	3	35000	ME	OUI	OUI
NDERE III	349	M	65	PRI	MA	14	HE	COVE	25	12	7.5	CUPU	MC	SD	50000	80	25	TRA	CHI	OUI	OUI	NON	150	1	OUI	OUI	NON	NON	NON	NON	NON	NON	AUT	FTIN	2400	150000	240000	MARCHE	OUI	OUI	OUI	NON	HER	NSS	3	35000	EF	OUI	OUI
NDERE III	350	M	56	PFO	MA	12	HE	COVE	12	10	3	CUPU	BR	LAB	41666	80	30	TRA	CHI	OUI	OUI	NON	200	2	NON	OUI	OUI	NON	NON	NON	NON	NON	ROT	IN	2000	110000	200000	MARCHE	OUI	OUI	OUI	NON	HER	SE	2	20000	ME	OUI	OUI
NDERE III	351	M	28	SEC	CE	20	DO	COVE	3	4	2	CUPU	ML	SD	31250	80	40	AME	ORGMIN	OUI	NON	OUI	100	2	NON	OUI	OUI	NON	NON	NON	NON	OUI	AO	IN	1500	80000	150000	MARCHE	OUI	OUI	NON	NON	HER	NSS	2	18000	PE	OUI	OUI
NDERE III	352	F	30	PRI	MA	6	AC	CO	4	3	1.5	ASSO	BR	LAB	31250	80	40	AME	ORG	NON	NON	NON	200	1	OUI	OUI	OUI	NON	NON	NON	NON	NON	AO	FTIN	1200	50000	120000		OUI	OUI	OUI	NON	HER	SE	2	30000	ME	NON	OUI
NDERE III	353	M	46	PRI	MA	9	HE	COVE	15	7	4	CUPU	BR	SD	41666	80	30	AME	CHI	OUI	OUI	NON	200	2	NON	OUI	OUI	NON	NON	NON	NON	NON	AUT	IN	3000	180000	300000	MARCHE	OUI	OUI	OUI	NON	HER	NSS	3	40000	ME	NON	OUI
NDERE III	354	M	48	PRI	MA	14	HE	COVE	20	10	3	CUPU	BR	SD	31250	80	40	AME	CHI	OUI	OUI	NON	150	2	NON	OUI	OUI	NON	NON	NON	NON	NON	AUT	IN	2800	150000	280000	MARCHE	OUI	OUI	OUI	NON	HER	NSS	2	40000	ME	NON	OUI
[truncated: 2 more columns]

## Sheet: Feuil4
FAMILLE PRINCIPALE-GRA	FAMILLE PRINCIPALE-FAB	FAMILLE PRINCIPALE-CYP	FAMILLE PRINCIPALE-AUT	METHODE LUTTE	TYPE	FREQUENCE	COUT	EFFICACITE	CONT GEST ADV-CEH	CONT GEST ADV-RAD	CONT GEST ADV-EDE	CONT GEST ADV-MMO
OUI	OUI	OUI	NON	HER	NSS	3	60000	TE	OUI	OUI	NON	NON
OUI	OUI	OUI	NON	HER	NSS	2	30000	ME	OUI	NON	NON	NON
OUI	OUI	OUI	NON	HER	NSS	3	50000	ME	OUI	NON	NON	NON
OUI	OUI	OUI	NON	HER	NSS	3	80000	TE	OUI	NON	NON	NON
OUI	OUI	OUI	NON	DMHE	NSS	3	25000	ME	OUI	OUI	NON	NON
OUI	NON	NON	OUI	HER	NSS	3	25000	RE	OUI	OUI	NON	NON
OUI	OUI	OUI	NON	HER	NSS	2	25000	EF	NON	OUI	NON	NON
OUI	OUI	OUI	NON	HER	NSS	3	35000	TE	OUI	NON	NON	NON
OUI	OUI	OUI	NON	HER	NSS	2	15000	TE	OUI	NON	NON	NON
OUI	OUI	OUI	NON	HER	NSS	2	15000	EF	OUI	OUI	NON	NON
OUI	NON	OUI	OUI	HER	NSS	2	20000	EF	OUI	OUI	OUI	NON
NON	OUI	NON	OUI	HER	NSS	2	20000	EF	OUI	OUI	OUI	NON
OUI	OUI	NON	NON	DMHE	NSS	3	35000	EF	OUI	OUI	OUI	NON
OUI	OUI	OUI	NON	DM	HOUES	2		EF	NON	NON	NON	OUI
OUI	OUI	OUI	NON	HER	NSS	3	30000	ME	NON	OUI	NON	NON
OUI	NON	OUI	OUI	DMHE	NSS	2	25000	EF	NON	OUI	NON	NON
OUI	OUI	NON	OUI	HER	NSS	2	30000	EF	OUI	OUI	NON	NON
OUI	OUI	OUI	NON	HER	NSS	3	50000	TE	OUI	NON	NON	NON
OUI	OUI	OUI	NON	HER	NSS	2	25000	EF	OUI	NON	NON	NON
OUI	OUI	NON	OUI	HER	NSS	3	35000	EF	OUI	OUI	OUI	NON
OUI	OUI	OUI	NON	HER	NSS	2	15000	EF	OUI	OUI	OUI	NON
OUI	OUI	OUI	NON	HER	NSS	3	75000	EF	OUI	OUI	OUI	NON
OUI	OUI	OUI	OUI	HER	NSS	3	35000	ME	OUI	OUI	NON	NON
OUI	OUI	OUI	OUI	HER	NSS	3	45000	ME	OUI	OUI	NON	NON
OUI	OUI	OUI	NON	HER	NSS	3	25000	ME	OUI	NON	NON	NON
OUI	OUI	OUI	NON	DMHE	NSS	2	18000	TE	OUI	NON	NON	NON
OUI	OUI	NON	OUI	DMHE	NSS	3	25000	ME	NON	OUI	NON	NON
OUI	OUI	NON	NON	HER	NSS	2	30000	TE	OUI	NON	NON	NON
OUI	OUI	OUI	NON	HER	NSS	3	45000	TE	OUI	NON	NON	NON
OUI	NON	NON	OUI	HER	NSS	2	25000	EF	OUI	OUI	NON	NON
OUI	OUI	OUI	NON	HER	NSS	3	25000	EF	OUI	OUI	NON	NON
OUI	OUI	OUI	NON	HER	SE	3	20000	TE	OUI	NON	NON	NON
OUI	OUI	OUI	NON	DMHE	NSS	3	30000	EF	OUI	OUI	NON	NON
OUI	OUI	OUI	NON	HER	NSS	2	60000	EF	NON	OUI	NON	NON
OUI	OUI	OUI	NON	DMHE	NSS	1	40000	EF	OUI	OUI	NON	NON
OUI	OUI	NON	NON	HER	NSS	4	60000	TE	OUI	NON	NON	NON
OUI	OUI	OUI	NON	DM	HOUES	3		EF	NON	OUI	NON	OUI
NON	NON	NON	OUI	DMHE	NSS	2	30000	TE	OUI	OUI	NON	NON
OUI	OUI	NON	NON	HER	NSS	2	40000	ME	OUI	NON	NON	NON
OUI	NON	OUI	NON	DM	HOUES	2		ME	NON	NON	NON	OUI
OUI	OUI	NON	NON	HER	NSS	2	25000	EF	OUI	OUI	NON	NON
NON	NON	NON	OUI	HER	NSS	2	20000	EF	OUI	OUI	NON	NON
OUI	NON	OUI	NON	DM	HOUES	2		EF	NON	NON	NON	OUI
NON	NON	NON	OUI	DMHE	NSS	2	25000	EF	OUI	OUI	OUI	NON
NON	NON	NON	OUI	DMHE	NSS	2	30000	ME	OUI	OUI	NON	OUI
OUI	OUI	OUI	NON	HER	NSS	1	40000	EF	OUI	OUI	OUI	NON
NON	OUI	NON	NON	HER	NSS	2	20000	EF	OUI	OUI	OUI	NON
NON	NON	NON	OUI	DMHE	NSS	2	25000	ME	OUI	OUI	NON	OUI
NON	NON	NON	OUI	HER	SE	2	20000	EF	NON	OUI	NON	NON
OUI	OUI	NON	NON	HER	NSS	2	24000	EF	OUI	NON	NON	NON
OUI	NON	NON	NON	HER	NSS	2	20000	EF	OUI	NON	NON	NON
OUI	NON	NON	NON	DMHE	SE	2	94000	TE	OUI	NON	NON	NON
OUI	OUI	NON	NON	HER	SE	2	25000	EF	OUI	NON	NON	NON
OUI	OUI	NON	NON	HER	SE	2	30000	EF	OUI	NON	NON	NON
OUI	OUI	NON	OUI	HER	SE	2	25000	EF	OUI	NON	NON	NON
OUI	OUI	OUI	NON	HER	SE	2	30000	EF	OUI	NON	NON	NON
OUI	OUI	NON	NON	HER	SE	1	12000	EF	OUI	NON	NON	NON
OUI	OUI	NON	NON	HER	NSS	2	22000	EF	OUI	NON	NON	NON
OUI	OUI	NON	OUI	HER	NSS	2	10500	EF	OUI	NON	NON	NON
OUI	OUI	OUI	NON	HER	NSS	3	40000	EF	OUI	OUI	OUI	NON
NON	NON	NON	OUI	HER	NSS	2	25000	EF	OUI	OUI	OUI	NON
NON	NON	NON	OUI	HER	NSS	2	20000	EF	OUI	OUI	OUI	NON
NON	NON	NON	OUI	HER	NSS	2	25000	EF	NON	OUI	NON	NON
OUI	OUI	OUI	NON	HER	SE	2	20000	ME	NON	OUI	NON	NON
OUI	OUI	NON	NON	DMHE	NSS	3	40000	EF	OUI	OUI	NON	NON
OUI	OUI	OUI	NON	DMHE	NSS	3	50000	TE	OUI	OUI	NON	NON
OUI	OUI	NON	NON	HER	NSS	3	40000	TE	OUI	OUI	OUI	NON
OUI	OUI	NON	NON	DMHE	NSS	2	35000	EF	OUI	OUI	NON	NON
OUI	OUI	NON	NON	HER	NSS	3	30000	EF	OUI	OUI	NON	NON
OUI	NON	NON	NON	HER	SE	2	25000	EF	NON	OUI	NON	NON
OUI	OUI	OUI	NON	HER	SE	2	30000	EF	OUI	OUI	NON	OUI
OUI	OUI	NON	NON	HER	NSS	3	40000	TE	OUI	OUI	NON	NON
OUI	OUI	NON	OUI	HER	SE	2	25000	EF	NON	OUI	NON	NON
OUI	OUI	OUI	NON	DMHE	NSS	2	30000	ME	NON	OUI	NON	NON
OUI	OUI	OUI	NON	HER	SE	2	20000	EF	OUI	OUI	NON	NON
OUI	OUI	NON	NON	HER	SE	2	25000	EF	OUI	OUI	NON	NON
OUI	OUI	NON	NON	HER	NSS	3	50000	TE	OUI	OUI	NON	NON
OUI	OUI	OUI	NON	DM	HOUES	2		EF	NON	NON	OUI	NON
OUI	OUI	NON	NON	HER	NSS	3	50000	TE	OUI	OUI	NON	NON
OUI	OUI	NON	OUI	HER	NSS	3	35000	EF	OUI	OUI	NON	NON
OUI	OUI	OUI	NON	HER	NSS	2	15000	EF	OUI	OUI	NON	NON
OUI	OUI	OUI	NON	HER	NSS	3	75000	EF	OUI	OUI	NON	NON
OUI	OUI	OUI	OUI	HER	NSS	3	35000	ME	OUI	OUI	NON	NON
OUI	OUI	OUI	OUI	HER	NSS	3	45000	ME	OUI	OUI	NON	NON
OUI	OUI	OUI	NON	HER	NSS	3	25000	ME	OUI	NON	NON	NON
OUI	OUI	OUI	NON	DMHE	NSS	2	18000	TE	OUI	NON	NON	NON
OUI	OUI	NON	OUI	DMHE	NSS	3	25000	ME	NON	OUI	NON	NON
OUI	OUI	OUI	NON	HER	NSS	2	30000	TE	OUI	NON	NON	NON
OUI	OUI	OUI	NON	HER	NSS	3	45000	TE	OUI	NON	NON	NON
OUI	NON	NON	OUI	HER	NSS	2	25000	EF	OUI	OUI	NON	NON
OUI	OUI	OUI	NON	HER	NSS	3	25000	EF	OUI	OUI	NON	NON
OUI	NON	NON	NON	HER	NSS	3	25000	TE	OUI	OUI	NON	NON
OUI	NON	NON	OUI	HER	NSS	3	30000	TE	OUI	OUI	NON	NON
OUI	OUI	OUI	NON	HER	NSS	2	25000	EF	NON	OUI	NON	NON
OUI	NON	NON	NON	HER	NSS	2	20000	ME	OUI	OUI	NON	NON
OUI	OUI	NON	NON	HER	NSS	3	35000	ME	OUI	OUI	NON	NON
NON	OUI	NON	NON	HER	NSS	2	15000	ME	OUI	OUI	NON	NON
OUI	OUI	OUI	NON	HER	NSS	2	20000	EF	OUI	OUI	NON	NON
OUI	OUI	NON	NON	DMHE	NSS	3	50000	ME	OUI	NON	OUI	NON
OUI	OUI	NON	NON	DMHE	SE	2	25000	EF	OUI	OUI	OUI	OUI
OUI	OUI	OUI	NON	HER	NSS	2	30000	ME	OUI	OUI	OUI	OUI
OUI	NON	NON	NON	DMHE	SE	1	20000	EF	NON	OUI	NON	NON
OUI	OUI	OUI	NON	DMHE	NSS	2	48000	ME	NON	OUI	NON	OUI
OUI	OUI	OUI	NON	DMHE	NSS	2	21000	ME	OUI	OUI	NON	NON
OUI	OUI	NON	NON	DMHE	NSS	2	50000	ME	OUI	NON	OUI	NON
OUI	OUI	OUI	NON	DMHE	NSS	2	50000	ME	OUI	NON	OUI	NON
OUI	OUI	OUI	NON	DMHE	NSS	2	50000	PE	OUI	OUI	OUI	NON
OUI	OUI	OUI	NON	HER	NSS	3	60000	TE	OUI	OUI	NON	NON
OUI	OUI	NON	NON	HER	NSS	1	20000	TE	OUI	NON	NON	NON
OUI	OUI	OUI	NON	HER	SE	2	20000	ME	OUI	OUI	NON	NON
OUI	OUI	NON	NON	HER	NSS	3	60000	ME	NON	OUI	NON	NON
OUI	OUI	OUI	NON	HER	NSS	2	20000	TE	OUI	NON	NON	NON
OUI	OUI	NON	NON	HER	NSS	1	15000	EF	OUI	OUI	NON	NON
NON	OUI	NON	NON	DMHE	NSS	2	30000	ME	OUI	OUI	NON	NON
OUI	OUI	NON	OUI	HER	NSS	4	60000	ME	OUI	OUI	NON	NON
OUI	OUI	NON	NON	HER	SE	1	15000	EF	OUI	NON	OUI	NON
OUI	OUI	NON	NON	DMHE	SE	2	25000	EF	OUI	NON	OUI	NON
OUI	OUI	OUI	NON	DMHE	SE	2	30000	EF	OUI	NON	OUI	NON
OUI	OUI	OUI	NON	DMHE	NSS	2	30000	ME	NON	OUI	OUI	NON
OUI	OUI	OUI	NON	HER	SE	2	25000	TE	OUI	NON	NON	NON
OUI	OUI	NON	NON	DMHE	SE	2	20000	EF	OUI	OUI	NON	NON
OUI	OUI	OUI	NON	HER	SE	2	22500	TE	OUI	OUI	NON	NON
OUI	OUI	OUI	NON	HER	NSS	3	70000	ME	OUI	NON	NON	NON
OUI	OUI	NON	NON	DMHE	NSS	3	60000	EF	OUI	OUI	NON	NON
OUI	OUI	NON	NON	HER	NSS	2	25000	ME	OUI	OUI	NON	NON
OUI	OUI	OUI	NON	HER	NSS	3	40000	TE	OUI	NON	NON	NON
OUI	OUI	OUI	NON	HER	NSS	2	15000	TE	OUI	NON	NON	NON
OUI	OUI	OUI	NON	HER	NSS	3	65000	TE	OUI	NON	NON	NON
OUI	OUI	OUI	NON	HER	NSS	2	25000	EF	OUI	OUI	NON	NON
OUI	OUI	OUI	NON	HER	NSS	3	50000	TE	OUI	OUI	NON	NON
OUI	OUI	NON	NON	HER	NSS	3	40000	TE	OUI	NON	NON	NON
OUI	OUI	OUI	NON	HER	NSS	3	50000	EF	OUI	NON	NON	NON
OUI	OUI	NON	NON	DM	HOUES	2	20000	TE	NON	NON	NON	OUI
OUI	OUI	NON	NON	DM	HOUES	2	30000	TE	OUI	NON	NON	NON
OUI	OUI	NON	NON	HER	SE	2	20000	EF	OUI	NON	NON	NON
OUI	OUI	OUI	NON	HER	NSS	2	15000	TE	OUI	OUI	NON	NON
OUI	OUI	OUI	NON	HER	NSS	2	20000	TE	OUI	OUI	NON	NON
OUI	OUI	OUI	NON	HER	NSS	3	50000	EF	OUI	OUI	NON	NON
OUI	OUI	OUI	NON	HER	NSS	3	50000	ME	OUI	OUI	NON	NON
OUI	OUI	OUI	NON	HER	NSS	2	25000	ME	OUI	OUI	NON	NON
OUI	NON	OUI	NON	HER	NSS	2	42000	EF	OUI	OUI	NON	NON
OUI	OUI	NON	NON	HER	SE	2	27000	TE	OUI	NON	NON	NON
OUI	OUI	NON	NON	DMHE	NSS	3	40000	EF	OUI	OUI	NON	NON
OUI	OUI	NON	NON	HER	NSS	3	35000	ME	OUI	OUI	NON	NON
NON	OUI	NON	NON	HER	NSS	2	15000	ME	OUI	OUI	NON	NON
OUI	OUI	OUI	NON	HER	NSS	2	20000	EF	OUI	NON	OUI	NON
OUI	OUI	NON	NON	DMHE	NSS	3	50000	ME	OUI	NON	OUI	NON
OUI	OUI	NON	NON	DMHE	SE	2	25000	EF	OUI	OUI	NON	NON
OUI	OUI	OUI	NON	HER	NSS	2	30000	ME	OUI	OUI	NON	NON
OUI	NON	NON	NON	DMHE	SE	1	20000	EF	NON	OUI	NON	NON
OUI	OUI	OUI	NON	DMHE	NSS	2	48000	ME	NON	OUI	NON	OUI
OUI	OUI	OUI	NON	DMHE	NSS	2	21000	ME	OUI	OUI	NON	NON
OUI	OUI	NON	NON	DMHE	NSS	2	50000	ME	OUI	NON	OUI	NON
OUI	OUI	OUI	NON	DMHE	NSS	2	50000	ME	OUI	NON	OUI	NON
OUI	OUI	OUI	NON	DMHE	NSS	2	50000	PE	OUI	OUI	OUI	NON
OUI	OUI	OUI	NON	HER	NSS	3	60000	TE	OUI	OUI	OUI	OUI
OUI	OUI	NON	NON	HER	NSS	1	20000	TE	OUI	NON	NON	NON
OUI	OUI	OUI	NON	HER	SE	2	20000	ME	OUI	OUI	NON	NON
OUI	OUI	NON	NON	HER	NSS	3	60000	ME	NON	OUI	NON	NON
OUI	OUI	OUI	NON	HER	NSS	2	20000	TE	OUI	NON	NON	NON
OUI	OUI	NON	NON	HER	NSS	1	15000	EF	OUI	OUI	NON	NON
NON	OUI	NON	NON	DMHE	NSS	2	30000	ME	OUI	OUI	NON	NON
NON	OUI	NON	OUI	HER	NSS	4	60000	ME	OUI	OUI	NON	NON
OUI	OUI	NON	NON	HER	SE	1	15000	EF	OUI	NON	OUI	NON
OUI	OUI	NON	NON	DMHE	SE	2	25000	EF	OUI	NON	OUI	NON
OUI	OUI	OUI	NON	DMHE	SE	2	30000	EF	OUI	NON	OUI	NON
OUI	OUI	OUI	NON	DMHE	NSS	2	30000	ME	NON	OUI	NON	NON
OUI	OUI	OUI	NON	HER	SE	2	25000	TE	OUI	NON	NON	NON
OUI	OUI	OUI	NON	HER	SE	2	22500	TE	OUI	OUI	NON	NON
OUI	OUI	OUI	NON	HER	NSS	3	70000	ME	OUI	NON	NON	NON
OUI	OUI	NON	NON	DMHE	NSS	3	60000	EF	OUI	OUI	NON	NON
OUI	OUI	NON	NON	HER	NSS	2	25000	ME	OUI	OUI	NON	NON
OUI	OUI	OUI	NON	HER	NSS	3	40000	TE	OUI	NON	NON	NON
OUI	OUI	OUI	NON	HER	NSS	2	15000	TE	OUI	NON	NON	NON
OUI	OUI	OUI	NON	HER	NSS	3	65000	TE	OUI	NON	NON	NON
OUI	OUI	OUI	NON	HER	NSS	2	25000	EF	OUI	OUI	NON	NON
OUI	OUI	OUI	NON	HER	NSS	3	50000	TE	OUI	OUI	NON	NON
OUI	OUI	NON	NON	HER	NSS	3	40000	TE	OUI	NON	NON	NON
OUI	OUI	OUI	NON	HER	NSS	3	50000	EF	OUI	NON	NON	NON
OUI	OUI	NON	NON	DM	HOUES	2	20000	TE	NON	NON	NON	OUI
OUI	OUI	NON	NON	DM	HOUES	2	30000	TE	OUI	NON	NON	NON
OUI	OUI	NON	NON	HER	SE	2	20000	EF	OUI	NON	NON	NON
OUI	OUI	OUI	NON	HER	NSS	2	15000	TE	OUI	OUI	NON	NON
OUI	OUI	OUI	NON	HER	NSS	2	20000	TE	OUI	OUI	NON	NON
OUI	OUI	OUI	NON	HER	NSS	2	17000	ME	OUI	OUI	NON	NON
OUI	OUI	NON	NON	HER	NSS	2	20000	EF	OUI	OUI	NON	NON
OUI	OUI	NON	NON	HER	NSS	3	30000	EF	OUI	OUI	NON	NON
OUI	OUI	OUI	NON	HER	NSS	3	40000	TE	OUI	NON	NON	NON
OUI	OUI	NON	NON	HER	NSS	3	40000	TE	OUI	NON	NON	NON
OUI	OUI	NON	NON	HER	NSS	2	25000	EF	OUI	NON	NON	NON
OUI	OUI	OUI	NON	HER	NSS	3	45000	TE	OUI	NON	NON	NON
OUI	OUI	NON	NON	HER	NSS	2	24000	EF	OUI	NON	NON	NON
OUI	OUI	OUI	NON	HER	NSS	2	15000	ME	OUI	OUI	NON	NON
OUI	OUI	OUI	NON	HER	NSS	2	18000	EF	OUI	NON	NON	NON
OUI	OUI	OUI	NON	HER	NSS	2	20000	TE	OUI	NON	NON	NON
OUI	OUI	NON	NON	HER	NSS	3	30000	TE	OUI	NON	NON	NON
OUI	OUI	NON	NON	HER	NSS	2	25000	TE	OUI	NON	NON	NON
OUI	OUI	OUI	NON	HER	NSS	2	30000	EF	OUI	NON	NON	NON
OUI	OUI	OUI	NON	HER	NSS	3	50000	TE	OUI	NON	NON	NON
OUI	OUI	NON	NON	HER	NSS	2	25000	EF	OUI	NON	NON	NON
OUI	OUI	OUI	NON	HER	NSS	3	45000	TE	OUI	NON	NON	NON
OUI	OUI	NON	NON	HER	NSS	2	24000	EF	OUI	NON	NON	NON
OUI	OUI	NON	NON	HER	NSS	2	18000	ME	OUI	OUI	NON	NON
OUI	OUI	OUI	NON	HER	NSS	2	18000	EF	OUI	NON	NON	NON
OUI	OUI	OUI	NON	HER	NSS	2	20000	TE	OUI	NON	NON	NON
OUI	OUI	NON	NON	HER	NSS	3	30000	TE	OUI	NON	NON	NON
OUI	OUI	NON	NON	HER	NSS	2	25000	TE	OUI	NON	NON	NON
OUI	OUI	OUI	NON	HER	NSS	2	30000	EF	OUI	NON	NON	NON
OUI	OUI	OUI	NON	HER	NSS	3	50000	TE	OUI	NON	NON	NON
OUI	OUI	NON	NON	HER	NSS	2	17000	ME	OUI	OUI	NON	NON
OUI	OUI	NON	NON	HER	NSS	2	20000	EF	OUI	OUI	NON	NON
OUI	OUI	NON	NON	HER	NSS	3	30000	EF	OUI	OUI	NON	NON
OUI	OUI	OUI	NON	HER	NSS	3	40000	TE	OUI	NON	NON	NON
OUI	OUI	NON	NON	HER	NSS	3	40000	TE	OUI	NON	NON	NON
OUI	OUI	NON	NON	HER	NSS	2	25000	EF	OUI	NON	NON	NON
OUI	OUI	OUI	NON	HER	NSS	3	45000	TE	OUI	NON	NON	NON
OUI	OUI	NON	NON	HER	NSS	2	24000	EF	OUI	NON	NON	NON
OUI	OUI	OUI	NON	HER	NSS	2	15000	ME	OUI	OUI	NON	NON
OUI	OUI	OUI	NON	HER	NSS	2	18000	EF	OUI	NON	NON	NON
OUI	OUI	OUI	NON	HER	NSS	2	20000	TE	OUI	NON	NON	NON
OUI	OUI	NON	NON	HER	NSS	3	30000	TE	OUI	NON	NON	NON
OUI	OUI	NON	NON	HER	NSS	2	25000	TE	OUI	NON	NON	NON
OUI	OUI	OUI	NON	HER	NSS	2	30000	EF	OUI	NON	NON	NON
OUI	OUI	OUI	NON	HER	NSS	3	50000	TE	OUI	NON	NON	NON
OUI	OUI	NON	NON	HER	NSS	2	25000	EF	OUI	NON	NON	NON
OUI	OUI	OUI	NON	HER	NSS	3	45000	TE	OUI	NON	NON	NON
OUI	OUI	NON	NON	HER	NSS	2	24000	EF	OUI	NON	NON	NON
OUI	OUI	NON	NON	HER	NSS	2	18000	ME	OUI	OUI	NON	NON
OUI	OUI	OUI	NON	HER	NSS	2	18000	EF	OUI	NON	NON	NON
OUI	OUI	OUI	NON	HER	NSS	2	17000	ME	OUI	OUI	NON	NON
OUI	OUI	NON	NON	HER	NSS	2	20000	EF	OUI	OUI	NON	NON
OUI	OUI	NON	NON	HER	NSS	3	30000	EF	OUI	OUI	NON	NON
OUI	OUI	OUI	NON	HER	NSS	3	40000	TE	OUI	NON	NON	NON
OUI	OUI	NON	NON	HER	NSS	3	40000	TE	OUI	NON	NON	NON
OUI	OUI	NON	NON	HER	NSS	2	25000	EF	OUI	NON	NON	NON
OUI	OUI	OUI	NON	HER	NSS	3	45000	TE	OUI	NON	NON	NON
OUI	OUI	NON	NON	HER	NSS	2	24000	EF	OUI	NON	NON	NON
OUI	OUI	OUI	NON	HER	NSS	2	15000	ME	OUI	OUI	NON	NON
OUI	OUI	OUI	NON	HER	NSS	2	18000	EF	OUI	NON	NON	NON
OUI	OUI	OUI	NON	HER	NSS	2	20000	TE	OUI	NON	NON	NON
OUI	OUI	NON	NON	HER	NSS	3	30000	TE	OUI	NON	NON	NON
OUI	OUI	NON	NON	HER	NSS	2	25000	TE	OUI	NON	NON	NON
OUI	OUI	OUI	NON	HER	NSS	2	30000	EF	OUI	NON	NON	NON
OUI	OUI	OUI	NON	HER	NSS	3	50000	TE	OUI	NON	NON	NON
OUI	OUI	NON	NON	HER	NSS	2	25000	EF	OUI	NON	NON	NON
OUI	OUI	OUI	NON	HER	NSS	3	45000	TE	OUI	NON	NON	NON
OUI	OUI	NON	NON	HER	NSS	2	24000	EF	OUI	NON	NON	NON
OUI	OUI	NON	NON	HER	NSS	2	18000	ME	OUI	OUI	NON	NON
OUI	OUI	OUI	NON	HER	NSS	2	18000	EF	OUI	NON	NON	NON
OUI	OUI	OUI	NON	HER	NSS	2	20000	TE	OUI	NON	NON	NON
OUI	OUI	NON	NON	HER	NSS	3	30000	TE	OUI	NON	NON	NON
OUI	OUI	NON	NON	HER	NSS	2	25000	TE	OUI	NON	NON	NON
OUI	OUI	OUI	NON	HER	NSS	2	30000	EF	OUI	NON	NON	NON
OUI	OUI	OUI	NON	HER	NSS	3	50000	EF	OUI	NON	NON	NON
OUI	OUI	OUI	NON	HER	NSS	2	17000	ME	OUI	OUI	NON	NON
OUI	OUI	OUI	NON	HER	NSS	2	20000	EF	OUI	OUI	NON	NON
OUI	OUI	OUI	NON	HER	NSS	3	30000	EF	OUI	OUI	NON	NON
OUI	OUI	OUI	NON	HER	NSS	3	40000	TE	OUI	NON	NON	NON
OUI	OUI	NON	NON	HER	NSS	3	40000	TE	OUI	NON	NON	NON
OUI	OUI	NON	NON	HER	NSS	2	25000	EF	OUI	NON	NON	NON
OUI	OUI	OUI	NON	HER	NSS	3	45000	TE	OUI	NON	NON	NON
OUI	OUI	NON	NON	HER	NSS	2	24000	EF	OUI	NON	NON	NON
OUI	OUI	OUI	NON	HER	NSS	2	15000	ME	OUI	OUI	NON	NON
OUI	OUI	OUI	NON	HER	NSS	2	18000	EF	OUI	NON	NON	NON
OUI	OUI	OUI	NON	HER	NSS	2	20000	TE	OUI	NON	NON	NON
OUI	OUI	NON	NON	HER	NSS	3	30000	TE	OUI	NON	NON	NON
OUI	OUI	OUI	NON	HER	NSS	3	45000	TE	OUI	NON	NON	NON
OUI	OUI	NON	NON	HER	NSS	2	24000	EF	OUI	NON	NON	NON
OUI	OUI	NON	NON	HER	NSS	2	18000	ME	OUI	OUI	NON	NON
OUI	OUI	OUI	NON	HER	NSS	2	18000	EF	OUI	NON	NON	NON
OUI	OUI	OUI	NON	HER	NSS	2	20000	TE	OUI	NON	NON	NON
OUI	OUI	OUI	NON	HER	SE	2	30000	ME	NON	OUI	NON	NON
OUI	OUI	NON	NON	HER	SE	2	25000	ME	NON	OUI	NON	OUI
OUI	OUI	NON	NON	HER	SE	2	25000	ME	NON	OUI	NON	OUI
OUI	OUI	OUI	NON	HER	SE	1	15000	EF	NON	OUI	NON	OUI
OUI	OUI	NON	NON	HER	SE	2	20000	ME	NON	OUI	NON	OUI
OUI	OUI	OUI	NON	HER	NSS	4	60000	EF	OUI	OUI	NON	NON
OUI	OUI	OUI	NON	DM	HOUES	2	28000	EF	NON	NON	NON	OUI
OUI	OUI	NON	NON	HER	NSS	3	35000	EF	OUI	OUI	NON	NON
OUI	OUI	OUI	NON	HER	NSS	3	30000	EF	OUI	OUI	NON	NON
OUI	OUI	OUI	NON	HER	NSS	3	40000	ME	OUI	OUI	NON	NON
OUI	OUI	NON	NON	HER	SE	2	30000	ME	NON	OUI	NON	NON
OUI	OUI	NON	NON	DMHE	SE	1	10000	PE	OUI	OUI	NON	OUI
OUI	OUI	OUI	NON	DMHE	NSS	3	25000	EF	OUI	OUI	NON	NON
OUI	OUI	OUI	NON	HER	NSS	3	35000	ME	NON	OUI	NON	NON
OUI	OUI	NON	NON	HER	SE	1	12000	PE	NON	OUI	NON	OUI
OUI	OUI	OUI	NON	HER	NSS	2	30000	ME	NON	OUI	NON	NON
OUI	OUI	OUI	NON	HER	SE	2	25000	ME	NON	OUI	NON	NON
OUI	OUI	NON	NON	HER	NSS	3	40000	EF	OUI	OUI	NON	NON
OUI	OUI	OUI	NON	HER	NSS	2	25000	EF	OUI	OUI	NON	NON
OUI	OUI	OUI	NON	HER	NSS	2	20000	ME	OUI	OUI	NON	OUI
OUI	OUI	NON	NON	HER	NSS	3	30000	ME	NON	OUI	NON	NON
OUI	OUI	NON	NON	HER	NSS	3	35000	ME	OUI	OUI	NON	NON
OUI	OUI	OUI	NON	HER	NSS	3	35000	EF	OUI	OUI	NON	NON
OUI	OUI	OUI	NON	HER	SE	2	20000	ME	OUI	OUI	NON	NON
OUI	OUI	NON	NON	HER	NSS	2	18000	PE	OUI	OUI	NON	NON
OUI	OUI	OUI	NON	HER	SE	2	30000	ME	NON	OUI	NON	NON
OUI	OUI	OUI	NON	HER	NSS	3	40000	ME	NON	OUI	NON	NON
OUI	OUI	NON	NON	HER	SE	2	20000	ME	OUI	OUI	NON	NON
OUI	OUI	OUI	NON	HER	SE	2	30000	ME	NON	OUI	NON	NON
OUI	OUI	NON	NON	HER	NSS	2	20000	ME	NON	OUI	NON	NON
OUI	OUI	OUI	NON	HER	SE	2	30000	ME	NON	OUI	NON	NON
OUI	OUI	NON	NON	HER	SE	2	25000	ME	NON	OUI	NON	OUI
OUI	OUI	NON	NON	HER	SE	2	25000	ME	NON	OUI	NON	OUI
OUI	OUI	OUI	NON	HER	SE	1	15000	EF	NON	OUI	NON	OUI
OUI	OUI	NON	NON	HER	SE	2	20000	ME	NON	OUI	NON	OUI
OUI	OUI	OUI	NON	HER	NSS	4	60000	EF	OUI	OUI	NON	NON
OUI	OUI	OUI	NON	DM	HOUES	2	28000	EF	NON	NON	NON	OUI
OUI	OUI	NON	NON	HER	NSS	3	35000	EF	OUI	OUI	NON	NON
OUI	OUI	OUI	NON	HER	NSS	3	30000	EF	OUI	OUI	NON	NON
OUI	OUI	OUI	NON	HER	NSS	3	40000	ME	OUI	OUI	NON	NON
OUI	OUI	NON	NON	HER	SE	2	30000	ME	NON	OUI	NON	NON
OUI	OUI	NON	NON	DMHE	SE	1	10000	PE	OUI	OUI	NON	OUI
OUI	OUI	OUI	NON	DMHE	NSS	3	25000	EF	OUI	OUI	NON	NON
OUI	OUI	OUI	NON	HER	NSS	3	35000	ME	NON	OUI	NON	NON
OUI	OUI	NON	NON	HER	SE	1	12000	PE	NON	OUI	NON	OUI
OUI	OUI	OUI	NON	HER	NSS	2	30000	ME	NON	OUI	NON	NON
OUI	OUI	OUI	NON	HER	SE	2	25000	ME	NON	OUI	NON	NON
OUI	OUI	NON	NON	HER	NSS	3	40000	EF	OUI	OUI	NON	NON
OUI	OUI	OUI	NON	HER	NSS	2	25000	EF	OUI	OUI	NON	NON
OUI	OUI	OUI	NON	HER	NSS	2	20000	ME	OUI	OUI	NON	OUI
OUI	OUI	OUI	NON	HER	NSS	3	30000	ME	NON	OUI	NON	NON
OUI	OUI	NON	NON	HER	NSS	3	35000	ME	OUI	OUI	NON	NON
OUI	OUI	OUI	NON	HER	NSS	3	35000	EF	OUI	OUI	NON	NON
OUI	OUI	OUI	NON	HER	SE	2	20000	ME	OUI	OUI	NON	NON
OUI	OUI	NON	NON	HER	NSS	2	18000	PE	OUI	OUI	NON	NON
OUI	OUI	OUI	NON	HER	SE	2	30000	ME	NON	OUI	NON	NON
OUI	OUI	OUI	NON	HER	NSS	3	40000	ME	NON	OUI	NON	NON
OUI	OUI	NON	NON	HER	SE	2	25000	ME	NON	OUI	NON	OUI
OUI	OUI	OUI	NON	HER	SE	1	15000	EF	NON	OUI	NON	OUI
OUI	OUI	NON	NON	HER	SE	2	20000	ME	NON	OUI	NON	OUI
OUI	OUI	OUI	NON	HER	NSS	4	60000	EF	OUI	OUI	NON	NON
OUI	OUI	OUI	NON	DM	HOUES	2	28000	EF	NON	NON	NON	OUI
OUI	OUI	NON	NON	HER	NSS	3	35000	EF	OUI	OUI	NON	NON
OUI	OUI	OUI	NON	HER	NSS	3	30000	EF	OUI	OUI	NON	NON
OUI	OUI	OUI	NON	HER	NSS	3	40000	ME	OUI	OUI	NON	NON
OUI	OUI	NON	NON	HER	SE	2	30000	ME	NON	OUI	NON	NON
OUI	OUI	NON	NON	DMHE	SE	1	10000	PE	OUI	OUI	NON	OUI
OUI	OUI	OUI	NON	DMHE	NSS	3	25000	EF	OUI	OUI	NON	NON
OUI	OUI	OUI	NON	HER	NSS	3	35000	ME	NON	OUI	NON	NON
OUI	OUI	NON	NON	HER	SE	1	12000	PE	NON	OUI	NON	OUI
OUI	OUI	OUI	NON	HER	NSS	2	30000	ME	NON	OUI	NON	NON
OUI	OUI	OUI	NON	HER	SE	2	25000	ME	NON	OUI	NON	NON
OUI	OUI	NON	NON	HER	NSS	3	40000	EF	OUI	OUI	NON	NON
OUI	OUI	OUI	NON	HER	NSS	2	25000	EF	OUI	OUI	NON	NON
OUI	OUI	OUI	NON	HER	NSS	2	20000	ME	OUI	OUI	NON	OUI
OUI	OUI	NON	NON	HER	NSS	3	30000	ME	NON	OUI	NON	NON
OUI	OUI	NON	NON	HER	NSS	3	35000	ME	OUI	OUI	NON	NON
OUI	OUI	OUI	NON	HER	NSS	3	35000	EF	OUI	OUI	NON	NON
OUI	OUI	OUI	NON	HER	SE	2	20000	ME	OUI	OUI	NON	NON
OUI	OUI	NON	NON	HER	NSS	2	18000	PE	OUI	OUI	NON	NON
OUI	OUI	OUI	NON	HER	SE	2	30000	ME	NON	OUI	NON	NON
OUI	OUI	OUI	NON	HER	NSS	3	40000	ME	NON	OUI	NON	NON
OUI	OUI	OUI	NON	HER	NSS	2	40000	ME	NON	OUI	NON	NON

## Sheet: Feuil2
Codes variables	Signification
M	Masculin
F	Féminin
PFO	Pas de formation formelle
PRI	Primaire
SEC	Secondaire
SUP	Supérieur
MA	Marié
CE	Célibataire
AGRI	Agriculture
AC	Achat
DO	Dons
LO	Location
HE	Heritage
COVE	Consommation et vente
CO	Consommation
VE	Vente
CUPU	Culture pure
ASSO	Association
BR	Bon rendement
ML	Moins laborieux
MC	Moins couteux
DI	Diversifié
LAB	Labour
SD	Semis direct
PLU	Pluvial
TRA	Traditionnelle
AME	Améliorée
CHI	Chimique
ORG	Oragnique
ORGMIN	Organominerale
FER	Fertilité
ADV	Adventices
RAV	Ravageurs
FIN	Financement
MAR	Marché
SEM	Semence de qualité
ROT	Rotation
JA	Jachère
AO	Amendement organique
EC	Engrais chimique
IN	Intrants
FT	Formation technique
MA	Marché
FI	Finances
HER	Herbicide
DM	Desherbage manuel
DM,HER	Desherbage manuel,Herbicide
RAD	Resistance adventice
CEH	Cout élévé herbicde
MMO	Manque main d'œuvre
TE	Tres efficace
EF	Efficace
ME	Moyennement efficace
PE	Peu efficace
NS	Non selectif
SE	Selectif
GRA	Graminées
FAB	Fabacees
CYP	Cypéracees
AUT	Autres (Rubiaceae,Euphorbiaceae etc)

## Sheet: Feuil3
ARRONDISSEMENT	PROD	SEXE	CONTRAINTES PRODUCTION	FER	ADV	RAV	FIN	SEM	MEC	MAR	HYD	EXEMPLE FERTI	NPK	UREE	BOURSE DE VACHE	CONTRAINTES GESTION ADVENTICE	CEH	RAD	EDE	MMO	FAMILLE PRINCIPALES ADVENTICES	GRA	FAB	CYP	AUT
MBE	1	M	FER,ADV,RAV,FIN	OUI	OUI	OUI	OUI	NON	NON	NON	NON	NPK,UREE	OUI	OUI	NON	CEH,RAD	OUI	OUI	NON	NON	GRA,FAB,CYP	OUI	OUI	OUI	NON
MBE	2	M	FER,ADV	OUI	OUI	NON	NON	NON	NON	NON	NON	NPK,UREE	OUI	OUI	NON	CEH	OUI	NON	NON	NON	GRA,FAB,CYP	OUI	OUI	OUI	NON
MBE	3	M	FER,ADV	OUI	OUI	NON	NON	NON	NON	NON	NON	NPK,UREE	OUI	OUI	NON	CEH	OUI	NON	NON	NON	GRA,FAB,CYP	OUI	OUI	OUI	NON
MBE	4	M	FER,ADV,RAV	OUI	OUI	OUI	NON	NON	NON	NON	NON	NPK	OUI	NON	NON	CEH	OUI	NON	NON	NON	GRA,FAB,CYP	OUI	OUI	OUI	NON
MBE	5	M	ADV,RAV	NON	OUI	OUI	NON	NON	NON	NON	NON	NPK	OUI	NON	NON	CEH,RAD	OUI	OUI	NON	NON	GRA,FAB,CYP	OUI	OUI	OUI	NON
MBE	6	M	ADV	NON	OUI	NON	NON	NON	NON	NON	NON	NPK,UREE	OUI	OUI	NON	CEH,RAD	OUI	OUI	NON	NON	GRA,AUT	OUI	NON	NON	OUI
MBE	7	M	FER,ADV	OUI	OUI	NON	NON	NON	NON	NON	NON	NPK	OUI	NON	NON	RAD	NON	OUI	NON	NON	GRA,FAB,CYP	OUI	OUI	OUI	NON
MBE	8	M	ADV,RAV	NON	OUI	OUI	NON	NON	NON	NON	NON	NPK,UREE	OUI	OUI	NON	CEH	OUI	NON	NON	NON	GRA,FAB,CYP	OUI	OUI	OUI	NON
MBE	9	M	ADV,RAV	NON	OUI	OUI	NON	NON	NON	NON	NON	NPK,UREE	OUI	OUI	NON	CEH	OUI	NON	NON	NON	GRA,FAB,CYP	OUI	OUI	OUI	NON
MBE	10	F	ADV,SEM,MEC	NON	OUI	NON	NON	OUI	OUI	NON	NON	NPK,UREE	OUI	OUI	NON	CEH,RAD	OUI	OUI	NON	NON	GRA,FAB,CYP	OUI	OUI	OUI	NON
MBE	11	M	ADV,RAV,SEM,FIN	NON	OUI	OUI	OUI	OUI	NON	NON	NON	NPK	OUI	NON	NON	CEH,RAD,EDE	OUI	OUI	OUI	NON	GRA,AUT	OUI	NON	OUI	OUI
MBE	12	M	ADV,RAV,SEM,FIN	NON	OUI	OUI	OUI	OUI	NON	NON	NON	NPK	OUI	NON	NON	CEH,RAD,EDE	OUI	OUI	OUI	NON	FAB,AUT	NON	OUI	NON	OUI
MBE	13	F	ADV,RAV,SEM,FIN	NON	OUI	OUI	OUI	OUI	NON	NON	NON	NPK	OUI	NON	NON	CEH,RAD,EDE	OUI	OUI	OUI	NON	GRA,FAB	OUI	OUI	NON	NON
MBE	14	F	FER,ADV	OUI	OUI	NON	NON	NON	NON	NON	NON	BOURSE VACHE	NPK	NON	OUI	MMO	NON	NON	NON	OUI	GRA,FAB,CYP	OUI	OUI	OUI	NON
MBE	15	F	ADV,RAV	NON	OUI	OUI	NON	NON	NON	NON	NON	NPK	OUI	NON	NON	RAD	NON	OUI	NON	NON	GRA,FAB,CYP	OUI	OUI	OUI	NON
MBE	16	M	ADV,RAV	NON	OUI	OUI	NON	NON	NON	NON	NON	NPK,UREE	OUI	OUI	NON	RAD	NON	OUI	NON	NON	GRA,CYP,AUT	OUI	NON	OUI	OUI
MBE	17	M	ADV,RAV	NON	OUI	OUI	NON	NON	NON	NON	NON	NPK	OUI	NON	NON	CEH,RAD	OUI	OUI	NON	NON	GRA,FAB,AUT	OUI	OUI	NON	OUI
MBE	18	M	FER,ADV	OUI	OUI	NON	NON	NON	NON	NON	NON	NPK,UREE	OUI	OUI	NON	CEH	OUI	NON	NON	NON	GRA,FAB,CYP	OUI	OUI	OUI	NON
MBE	19	M	FER,ADV	OUI	OUI	NON	NON	NON	NON	NON	NON	NPK,UREE	OUI	OUI	NON	CEH	OUI	NON	NON	NON	GRA,FAB,CYP	OUI	OUI	OUI	NON
MBE	20	M	ADV,RAV	NON	OUI	OUI	NON	NON	NON	NON	NON	NPK,UREE	OUI	OUI	NON	CEH,RAD,EDE	OUI	OUI	OUI	NON	GRA,FAB,AUT	OUI	OUI	NON	OUI
MBE	21	M	ADV,RAV,SEM	NON	OUI	OUI	NON	OUI	NON	NON	NON	NPK	OUI	NON	NON	CEH,RAD,EDE	OUI	OUI	OUI	NON	GRA,FAB,CYP	OUI	OUI	OUI	NON
MBE	22	M	ADV,RAV,SEM,MEC	NON	OUI	OUI	NON	OUI	OUI	NON	NON	NPK,UREE	OUI	OUI	NON	CEH,RAD,EDE	OUI	OUI	OUI	NON	GRA,FAB,CYP	OUI	OUI	OUI	NON
MBE	23	M	ADV,RAV	NON	OUI	OUI	NON	NON	NON	NON	NON	NPK,UREE	OUI	OUI	NON	CEH,RAD	OUI	OUI	NON	NON	GRA,FAB,CYP,AUT	OUI	OUI	OUI	OUI
MBE	24	M	ADV,RAV	NON	OUI	OUI	NON	NON	NON	NON	NON	NPK,UREE	OUI	OUI	NON	CEH,RAD	OUI	OUI	NON	NON	GRA,FAB,CYP,AUT	OUI	OUI	OUI	OUI
MBE	25	F	ADV,RAV	NON	OUI	OUI	NON	NON	NON	NON	NON	NPK,UREE	OUI	OUI	NON	CEH	OUI	NON	NON	NON	GRA,FAB,CYP	OUI	OUI	OUI	NON
MBE	26	M	ADV,RAV	NON	OUI	OUI	NON	NON	NON	NON	NON	NPK,UREE	OUI	OUI	NON	CEH	OUI	NON	NON	NON	GRA,FAB,CYP	OUI	OUI	OUI	NON
MBE	27	M	FER,ADV,RAV	OUI	OUI	OUI	NON	NON	NON	NON	NON	NPK,UREE	OUI	OUI	NON	RAD	NON	OUI	NON	NON	GRA,FAB,AUT	OUI	OUI	NON	OUI
MBE	28	M	ADV,RAV	NON	OUI	OUI	NON	NON	NON	NON	NON	NPK,UREE	OUI	OUI	NON	CEH	OUI	NON	NON	NON	GRA,FAB,CYP	OUI	OUI	NON	NON
MBE	29	M	ADV	NON	OUI	NON	NON	NON	NON	NON	NON	NPK,UREE	OUI	OUI	NON	CEH	OUI	NON	NON	NON	GRA,FAB,CYP	OUI	OUI	OUI	NON
MBE	30	M	ADV,RAV,MEC,MAR	NON	OUI	OUI	NON	NON	OUI	OUI	NON	NPK,UREE	OUI	OUI	NON	CEH,RAD	OUI	OUI	NON	NON	GRA,AUT	OUI	NON	NON	OUI
MBE	31	F	ADV,RAV	NON	OUI	OUI	NON	NON	NON	NON	NON	BOURSE VACHE	NON	NON	OUI	CEH,RAD	OUI	OUI	NON	NON	GRA,FAB,CYP	OUI	OUI	OUI	NON
MBE	32	M	ADV,RAV	NON	OUI	OUI	NON	NON	NON	NON	NON	NPK,UREE	OUI	OUI	NON	CEH	OUI	NON	NON	NON	GRA,FAB,CYP	OUI	OUI	OUI	NON
MBE	33	M	FER,ADV,RAV	OUI	OUI	OUI	NON	NON	NON	NON	NON	UREE	NON	OUI	NON	CEH,RAD	OUI	OUI	NON	NON	GRA,FAB,CYP	OUI	OUI	OUI	NON
MBE	34	M	ADV,RAV	NON	OUI	OUI	NON	NON	NON	NON	NON	NPK	OUI	NON	NON	RAD	NON	OUI	NON	NON	GRA,FAB,CYP	OUI	OUI	OUI	NON
MBE	35	M	ADV,RAV	NON	OUI	OUI	NON	NON	NON	NON	NON	NPK	OUI	NON	NON	CEH,RAD	OUI	OUI	NON	NON	GRA,FAB,CYP	OUI	OUI	OUI	NON
MBE	36	M	ADV,RAV	NON	OUI	OUI	NON	NON	NON	NON	NON	NPK,UREE	OUI	OUI	NON	CEH	OUI	NON	NON	NON	GRA,FAB	OUI	OUI	NON	NON
MBE	37	F	ADV	NON	OUI	NON	NON	NON	NON	NON	NON	BOURSE VACHE	NON	NON	OUI	MMO,RAD	NON	OUI	NON	OUI	GRA,FAB,CYP	OUI	OUI	OUI	NON
MBE	38	M	ADV,RAV,SEM	NON	OUI	OUI	NON	OUI	NON	NON	NON	NPK,UREE	OUI	OUI	NON	CEH,RAD	OUI	OUI	NON	NON	AUT	NON	NON	NON	OUI
MBE	39	F	FER,ADV,RAV	OUI	OUI	OUI	NON	NON	NON	NON	NON	NPK,UREE	OUI	OUI	NON	CEH	OUI	NON	NON	NON	GRA,FAB	OUI	OUI	NON	NON
MBE	40	F	FER,ADV,RAV	OUI	OUI	OUI	NON	NON	NON	NON	NON	NPK,UREE	OUI	OUI	NON	MMO	NON	NON	NON	OUI	GRA,CYP	OUI	NON	OUI	NON
MBE	41	M	ADV,RAV,FIN,SEM	NON	OUI	OUI	OUI	OUI	NON	NON	NON	NPK,UREE	OUI	OUI	NON	CEH,RAD	OUI	OUI	NON	NON	GRA,FAB	OUI	OUI	NON	NON
MBE	42	M	ADV,SEM,FIN	NON	OUI	NON	OUI	OUI	NON	NON	NON	NPK,UREE	OUI	OUI	NON	CEH,RAD	OUI	OUI	NON	NON	AUT	NON	NON	NON	OUI
MBE	43	F	FER,ADV,RAV	OUI	OUI	OUI	NON	NON	NON	NON	NON	NPK,UREE	OUI	OUI	NON	MMO	NON	NON	NON	OUI	GRA,CYP	OUI	NON	OUI	NON
MBE	44	F	FER,ADV,RAV	OUI	OUI	OUI	NON	NON	NON	NON	NON	NPK,UREE	OUI	OUI	NON	CEH,RAD,EDE	OUI	OUI	OUI	NON	AUT	NON	NON	NON	OUI
MBE	45	M	RAV	NON	NON	OUI	NON	NON	NON	NON	NON	NPK,UREE	OUI	OUI	NON	CEH,RAD,MMO	OUI	OUI	NON	OUI	AUT	NON	NON	NON	OUI
MBE	46	M	ADV,RAV,MEC,MAR	NON	OUI	OUI	NON	NON	OUI	OUI	NON	NPK,UREE	OUI	OUI	NON	CEH,RAD,EDE	OUI	OUI	OUI	NON	GRA,FAB,CYP	OUI	OUI	OUI	NON
MBE	47	M	ADV,FIN	NON	OUI	NON	OUI	NON	NON	NON	NON	NPK,UREE	OUI	OUI	NON	CEH,RAD,EDE	OUI	OUI	OUI	NON	FAB	NON	OUI	NON	NON
MBE	48	M	FER,ADV	OUI	OUI	NON	NON	NON	NON	NON	NON	NPK,UREE	OUI	OUI	NON	CEH,RAD,MMO	OUI	OUI	NON	OUI	AUT	NON	NON	NON	OUI
MBE	49	M	FER,ADV	OUI	OUI	NON	NON	NON	NON	NON	NON	NPK	OUI	NON	NON	RAD	NON	OUI	NON	NON	AUT	NON	NON	NON	OUI
MBE	50	M	FER,ADV	OUI	OUI	NON	NON	NON	NON	NON	NON	NPK	OUI	NON	NON	CEH	OUI	NON	NON	NON	GRA,FAB	OUI	OUI	NON	NON
MBE	51	M	FER,ADV	OUI	OUI	NON	NON	NON	NON	NON	NON	NPK	OUI	NON	NON	CEH	OUI	NON	NON	NON	GRA,FAB	OUI	NON	NON	NON
MBE	52	M	FER,ADV	OUI	OUI	NON	NON	NON	NON	NON	NON	NPK	OUI	NON	NON	CEH	OUI	NON	NON	NON	GRA	OUI	NON	NON	NON
MBE	53	M	FER,ADV	OUI	OUI	NON	NON	NON	NON	NON	NON	NPK	OUI	NON	NON	CEH	OUI	NON	NON	NON	GRA,FAB	OUI	OUI	NON	NON
MBE	54	M	FER,ADV	OUI	OUI	NON	NON	NON	NON	NON	NON	NPK,UREE	OUI	OUI	NON	CEH	OUI	NON	NON	NON	GRA,FAB	OUI	OUI	NON	NON
MBE	55	M	FER,ADV,RAV	OUI	OUI	OUI	NON	NON	NON	NON	NON	NPK,UREE	OUI	OUI	NON	CEH	OUI	NON	NON	NON	GRA,FAB,AUT	OUI	OUI	NON	OUI
MBE	56	M	FER,ADV	OUI	OUI	NON	NON	NON	NON	NON	NON	NPK	OUI	NON	NON	CEH	OUI	NON	NON	NON	GRA,FAB,CYP	OUI	OUI	OUI	NON
MBE	57	M	FER,ADV	OUI	OUI	NON	NON	NON	NON	NON	NON	NPK,UREE	OUI	OUI	NON	CEH	OUI	NON	NON	NON	GRA,FAB	OUI	OUI	NON	NON
MBE	58	M	FER,ADV	OUI	OUI	NON	NON	NON	NON	NON	NON	NPK	OUI	NON	NON	CEH	OUI	NON	NON	NON	GRA,FAB	OUI	OUI	NON	NON
MBE	59	F	FER,ADV,RAV	OUI	OUI	OUI	NON	NON	NON	NON	NON	NPK	OUI	NON	NON	CEH	OUI	NON	NON	NON	GRA,FAB,AUT	OUI	OUI	NON	OUI
MBE	60	M	ADV,MEC	NON	OUI	NON	NON	NON	OUI	NON	NON	NPK,UREE	OUI	OUI	NON	CEH,RAD,EDE	OUI	OUI	OUI	NON	GRA,FAB,CYP	OUI	OUI	OUI	NON
MBE	61	M	ADV,RAV,MEC,MAR	NON	OUI	OUI	NON	NON	OUI	OUI	NON	NPK,UREE	OUI	OUI	NON	CEH,RAD,EDE	OUI	OUI	OUI	NON	AUT	NON	NON	NON	OUI
MBE	62	M	ADV,MEC	NON	OUI	NON	NON	NON	OUI	NON	NON	NPK	OUI	NON	NON	CEH,RAD	OUI	OUI	OUI	NON	AUT	NON	NON	NON	OUI
MBE	63	M	FER,ADV	OUI	OUI	NON	NON	NON	NON	NON	NON	NPK,UREE	OUI	OUI	NON	RAD	NON	OUI	NON	NON	AUT	NON	NON	NON	OUI
MBE	64	F	FER,ADV	OUI	OUI	NON	NON	NON	NON	NON	NON	NPK,UREE	OUI	OUI	NON	RAD	NON	OUI	NON	NON	GRA,FAB,CYP	OUI	OUI	OUI	NON
MBE	65	M	ADV,MEC	NON	OUI	NON	NON	NON	OUI	NON	NON	NPK,UREE	OUI	OUI	NON	CEH,RAD	OUI	OUI	NON	NON	GRA,FAB	OUI	OUI	NON	NON
MBE	66	M	FER,ADV	OUI	OUI	NON	NON	NON	NON	NON	NON	NPK,UREE	OUI	OUI	NON	CEH,RAD	OUI	OUI	NON	NON	GRA,FAB,CYP	OUI	OUI	OUI	NON
MBE	67	M	FER,ADV	OUI	OUI	NON	NON	NON	NON	NON	NON	NPK,UREE	OUI	OUI	NON	CEH,RAD,EDE	OUI	OUI	OUI	NON	GRA,FAB	OUI	OUI	NON	NON
MBE	68	M	ADV	NON	OUI	NON	NON	NON	NON	NON	NON	NPK,UREE	OUI	OUI	NON	CEH,RAD	OUI	OUI	NON	NON	GRA,FAB	OUI	OUI	NON	NON
MBE	69	M	FER,ADV	OUI	OUI	NON	NON	NON	NON	NON	NON	NPK,UREE	OUI	OUI	NON	CEH,RAD	OUI	OUI	NON	NON	GRA,FAB	OUI	OUI	NON	NON
MBE	70	F	ADV,RAV,SEM	NON	OUI	OUI	NON	OUI	NON	NON	NON	NPK,UREE	OUI	OUI	NON	RAD	NON	OUI	NON	NON	GRA	OUI	NON	NON	NON
MBE	71	M	FER,ADV,RAV	OUI	OUI	OUI	NON	NON	NON	NON	NON	NPK,UREE	OUI	OUI	NON	MMO,RAD,CEH	OUI	OUI	NON	OUI	GRA,FAB,CYP	OUI	OUI	OUI	NON
MBE	72	M	FER,ADV,MEC	OUI	OUI	NON	NON	NON	OUI	NON	NON	NPK,UREE	OUI	OUI	NON	CEH,RAD	OUI	OUI	NON	NON	GRA,FAB	OUI	OUI	NON	NON
MBE	73	M	FER,ADV	OUI	OUI	NON	NON	NON	NON	NON	NON	NPK,UREE	OUI	OUI	NON	RAD	NON	OUI	NON	NON	GRA,FAB,AUT	OUI	OUI	NON	OUI
MBE	74	M	FER,ADV,RAV	OUI	OUI	OUI	NON	NON	NON	NON	NON	NPK,UREE	OUI	OUI	NON	RAD	NON	OUI	NON	NON	GRA,FAB,CYP	OUI	OUI	OUI	NON
MBE	75	M	ADV,RAV	NON	OUI	OUI	NON	NON	NON	NON	NON	NPK,UREE	OUI	OUI	NON	CEH,RAD	OUI	OUI	NON	NON	GRA,FAB,CYP	OUI	OUI	OUI	NON
MBE	76	M	ADV,SEM	NON	OUI	NON	NON	OUI	NON	NON	NON	NPK,UREE	OUI	OUI	NON	CEH,RAD	OUI	OUI	NON	NON	GRA,FAB	OUI	OUI	NON	NON
MBE	77	M	FER,ADV	OUI	OUI	NON	NON	NON	NON	NON	NON	NPK,UREE	OUI	OUI	NON	CEH,RAD	OUI	OUI	NON	NON	GRA,FAB	OUI	OUI	NON	NON
MBE	78	F	FER,ADV	OUI	OUI	NON	NON	NON	NON	NON	NON	BOURSE VACHE	NON	NON	OUI	MMO	NON	NON	OUI	NON	GRA,FAB,CYP	OUI	OUI	OUI	NON
MBE	79	M	FER,ADV,RAV	OUI	OUI	OUI	NON	NON	NON	NON	NON	NPK,UREE	OUI	OUI	NON	CEH,RAD	OUI	OUI	NON	NON	GRA,FAB	OUI	OUI	NON	NON
MBE	80	M	ADV,RAV	NON	OUI	OUI	NON	NON	NON	NON	NON	NPK,UREE	OUI	OUI	NON	CEH,RAD,EDE	OUI	OUI	NON	NON	GRA,FAB,AUT	OUI	OUI	NON	OUI
MBE	81	M	ADV,RAV,SEM	NON	OUI	OUI	NON	OUI	NON	NON	NON	NPK	OUI	NON	NON	CEH,RAD,EDE	OUI	OUI	NON	NON	GRA,FAB,CYP	OUI	OUI	OUI	NON
MBE	82	M	ADV,RAV,SEM,MEC	NON	OUI	OUI	NON	NON	NON	NON	NON	NPK,UREE	OUI	OUI	NON	CEH,RAD,EDE	OUI	OUI	NON	NON	GRA,FAB,CYP	OUI	OUI	OUI	NON
MBE	83	M	ADV,RAV	NON	OUI	OUI	NON	NON	NON	NON	NON	NPK,UREE	OUI	OUI	NON	CEH,RAD	OUI	OUI	NON	NON	GRA,FAB,CYP,AUT	OUI	OUI	OUI	OUI
MBE	84	M	ADV,RAV	NON	OUI	OUI	NON	NON	NON	NON	NON	NPK,UREE	OUI	OUI	NON	CEH,RAD	OUI	OUI	NON	NON	GRA,FAB,CYP,AUT	OUI	OUI	OUI	OUI
MBE	85	F	ADV	NON	OUI	NON	NON	NON	NON	NON	NON	NPK,UREE	OUI	OUI	NON	CEH	OUI	NON	NON	NON	GRA,FAB,CYP	OUI	OUI	OUI	NON
MBE	86	M	ADV,RAV	NON	OUI	OUI	NON	NON	NON	NON	NON	NPK,UREE	OUI	OUI	NON	CEH	OUI	NON	NON	NON	GRA,FAB,CYP	OUI	OUI	OUI	NON
MBE	87	M	FER,ADV,RAV	OUI	OUI	OUI	NON	NON	NON	NON	NON	NPK,UREE	OUI	OUI	NON	RAD	NON	OUI	NON	NON	GRA,FAB,AUT	OUI	OUI	NON	OUI
MBE	88	M	ADV,RAV	NON	OUI	OUI	NON	NON	NON	NON	NON	NPK,UREE	OUI	OUI	NON	CEH	OUI	NON	NON	NON	GRA,FAB,CYP	OUI	OUI	OUI	NON
MBE	89	M	ADV	NON	OUI	NON	NON	NON	NON	NON	NON	NPK,UREE	OUI	OUI	NON	CEH	OUI	NON	NON	NON	GRA,FAB,CYP	OUI	OUI	OUI	NON
MBE	90	M	ADV,RAV,MEC,MAR	NON	OUI	OUI	NON	NON	OUI	OUI	NON	NPK,UREE	OUI	OUI	NON	CEH,RAD	OUI	OUI	NON	NON	GRA,AUT	OUI	NON	NON	OUI
MBE	91	F	ADV,RAV	NON	OUI	OUI	NON	NON	NON	NON	NON	BOURSE VACHE	NON	NON	OUI	CEH,RAD	OUI	OUI	NON	NON	GRA,FAB,CYP	OUI	OUI	OUI	NON
MBE	92	M	ADV	NON	OUI	NON	NON	NON	NON	NON	NON	NPK,UREE	OUI	OUI	NON	CEH,RAD	OUI	OUI	NON	NON	GRA	OUI	NON	NON	NON
MBE	93	M	ADV,RAV	NON	OUI	OUI	NON	NON	NON	NON	NON	NPK,UREE	OUI	OUI	NON	CEH,RAD	OUI	OUI	NON	NON	GRA,AUT	OUI	NON	NON	OUI
MBE	94	M	FER,RAV	OUI	NON	OUI	NON	NON	NON	NON	NON	NPK	OUI	NON	NON	RAD	NON	OUI	NON	NON	GRA,FAB,CYP	OUI	OUI	OUI	NON
NGANHA	95	M	ADV,RAV	NON	OUI	OUI	NON	NON	NON	NON	NON	NPK,UREE	OUI	OUI	NON	CEH,RAD	OUI	OUI	NON	NON	GRA	OUI	NON	NON	NON
NGANHA	96	M	ADV	NON	OUI	NON	NON	NON	NON	NON	NON	NPK,UREE	OUI	OUI	NON	CEH,RAD	OUI	OUI	NON	NON	GRA,FAB	OUI	OUI	NON	NON
NGANHA	97	M	ADV	NON	OUI	NON	NON	NON	NON	NON	NON	NPK,UREE	OUI	OUI	NON	CEH,RAD	OUI	OUI	NON	NON	FAB	NON	OUI	NON	NON
NGANHA	98	M	FER,ADV,RAV	OUI	OUI	OUI	NON	NON	NON	NON	NON	NPK,UREE	OUI	OUI	NON	CEH,RAD	OUI	OUI	NON	NON	GRA,FAB,CYP	OUI	OUI	OUI	NON
NGANHA	99	M	FER,RAV	OUI	NON	OUI	NON	NON	NON	NON	NON	NPK,UREE	OUI	OUI	NON	CEH,EDE	OUI	NON	OUI	NON	GRA,FAB	OUI	OUI	NON	NON
NGANHA	100	M	ADV,RAV	NON	OUI	OUI	NON	NON	NON	NON	NON	NPK,UREE	OUI	OUI	NON	CEH,RAD	OUI	OUI	OUI	OUI	GRA,FAB	OUI	OUI	NON	NON
NGANHA	101	M	ADV,RAV	NON	OUI	OUI	NON	NON	NON	NON	NON	NPK,UREE	OUI	OUI	NON	CEH,RAD	OUI	OUI	OUI	OUI	GRA,FAB,CYP	OUI	OUI	OUI	NON
NGANHA	102	M	ADV,RAV	NON	OUI	OUI	NON	NON	NON	NON	NON	NPK,UREE	OUI	OUI	NON	RAD	NON	OUI	NON	NON	GRA	OUI	NON	NON	NON
NGANHA	103	M	ADV,RAV	NON	OUI	OUI	NON	NON	NON	NON	NON	NPK	OUI	NON	NON	MMO,RAD	NON	OUI	NON	OUI	GRA,FAB,CYP	OUI	OUI	OUI	NON
NGANHA	104	M	ADV,RAV	NON	OUI	OUI	NON	NON	NON	NON	NON	NPK,UREE	OUI	OUI	NON	CEH,RAD	OUI	OUI	NON	NON	GRA,FAB,CYP	OUI	OUI	OUI	NON
NGANHA	105	M	ADV,RAV	NON	OUI	OUI	NON	NON	NON	NON	NON	NPK,UREE	OUI	OUI	NON	CEH,EDE	OUI	NON	OUI	NON	GRA,FAB	OUI	OUI	NON	NON
NGANHA	106	M	FER,ADV,RAV	OUI	OUI	OUI	NON	NON	NON	NON	NON	NPK,UREE	OUI	OUI	NON	CEH,EDE	OUI	NON	OUI	NON	GRA,FAB,CYP	OUI	OUI	OUI	NON
NGANHA	107	M	ADV,RAV	NON	OUI	OUI	NON	NON	NON	NON	NON	NPK,UREE	OUI	OUI	NON	CEH,RAD,EDE	OUI	OUI	OUI	NON	GRA,FAB,CYP	OUI	OUI	OUI	NON
NGANHA	108	M	ADV,RAV	NON	OUI	OUI	NON	NON	NON	NON	NON	NPK,UREE	OUI	OUI	NON	CEH,RAD	OUI	OUI	NON	NON	GRA,FAB,CYP	OUI	OUI	OUI	NON
NGANHA	109	M	ADV,RAV	NON	OUI	OUI	NON	NON	NON	NON	NON	NPK,UREE	OUI	OUI	NON	CEH	OUI	NON	NON	NON	GRA,FAB	OUI	OUI	NON	NON
NGANHA	110	M	ADV,RAV	NON	OUI	OUI	NON	NON	NON	NON	NON	NPK,UREE	OUI	OUI	NON	CEH,RAD	OUI	OUI	NON	NON	GRA,FAB,CYP	OUI	OUI	OUI	NON
NGANHA	111	M	ADV	NON	OUI	NON	NON	NON	NON	NON	NON	NPK,UREE	OUI	OUI	NON	RAD	NON	OUI	NON	NON	GRA,FAB	OUI	OUI	NON	NON
NGANHA	112	M	ADV	NON	OUI	NON	NON	NON	NON	NON	NON	NPK,UREE	OUI	OUI	NON	CEH	OUI	NON	NON	NON	GRA,FAB,CYP	OUI	OUI	OUI	NON
NGANHA	113	F	ADV,RAV	NON	OUI	OUI	NON	NON	NON	NON	NON	NPK,UREE	OUI	OUI	NON	CEH,RAD	OUI	OUI	NON	NON	GRA,FAB	OUI	OUI	NON	NON
NGANHA	114	M	ADV,RAV	NON	OUI	OUI	NON	NON	NON	NON	NON	NPK,UREE	OUI	OUI	NON	CEH,RAD	OUI	OUI	NON	NON	FAB	NON	OUI	NON	NON
NGANHA	115	M	ADV,RAV	NON	OUI	OUI	NON	NON	NON	NON	NON	NPK,UREE	OUI	OUI	NON	CEH,RAD	OUI	OUI	NON	NON	FAB,AUT	OUI	OUI	NON	OUI
NGANHA	116	M	RAV,SEM	NON	OUI	NON	NON	OUI	NON	NON	NON	NPK,UREE	OUI	OUI	NON	CEH,EDE	OUI	NON	OUI	NON	GRA,FAB	OUI	OUI	NON	NON
NGANHA	117	M	FER,ADV,RAV	OUI	OUI	OUI	NON	NON	NON	NON	NON	NPK,UREE	OUI	OUI	NON	CEH,EDE	OUI	NON	OUI	NON	GRA,FAB	OUI	OUI	NON	NON
NGANHA	118	M	ADV,RAV	OUI	NON	OUI	NON	NON	NON	NON	NON	NPK,UREE	OUI	OUI	NON	CEH,EDE	OUI	NON	OUI	NON	GRA,FAB,CYP	OUI	OUI	OUI	NON
NGANHA	119	M	ADV	NON	OUI	NON	NON	NON	NON	NON	NON	NPK	OUI	NON	NON	RAD	NON	OUI	OUI	NON	GRA,FAB,CYP	OUI	OUI	OUI	NON
NGANHA	120	M	FER,ADV,RAV	OUI	OUI	OUI	NON	NON	NON	NON	NON	NPK	OUI	NON	NON	CEH	OUI	NON	NON	NON	GRA,FAB,CYP	OUI	OUI	OUI	NON
NGANHA	121	M	FER,ADV	OUI	OUI	NON	NON	NON	NON	NON	NON	NPK,UREE	OUI	OUI	NON	CEH,RAD	OUI	OUI	NON	NON	GRA,FAB	OUI	OUI	NON	NON
NGANHA	122	M	FER,ADV,RAV	OUI	OUI	OUI	NON	NON	NON	NON	NON	NPK,UREE	OUI	OUI	NON	CEH,RAD	OUI	OUI	NON	NON	GRA,FAB,CYP	OUI	OUI	OUI	NON
NGANHA	123	M	FER,ADV,RAV	OUI	OUI	OUI	NON	NON	NON	NON	NON	NPK,UREE	OUI	OUI	NON	CEH	OUI	NON	NON	NON	GRA,FAB,CYP	OUI	OUI	OUI	NON
NGANHA	124	M	FER,ADV,RAV	OUI	OUI	OUI	NON	NON	NON	NON	NON	NPK,UREE	OUI	OUI	NON	CEH,RAD	OUI	OUI	NON	NON	GRA,FAB	OUI	OUI	NON	NON
NGANHA	125	M	ADV,RAV,SEM	NON	OUI	OUI	NON	OUI	NON	NON	NON	NPK,UREE	OUI	OUI	NON	CEH,RAD	OUI	OUI	NON	NON	GRA,FAB	OUI	OUI	NON	NON
NGANHA	126	M	FER,ADV,RAV	OUI	OUI	OUI	NON	NON	NON	NON	NON	NPK	OUI	NON	NON	CEH	OUI	NON	NON	NON	GRA,FAB,CYP	OUI	OUI	OUI	NON
NGANHA	127	M	FER,ADV	OUI	OUI	NON	NON	NON	NON	NON	NON	NPK,UREE	OUI	OUI	NON	CEH	OUI	NON	NON	NON	GRA,FAB,CYP	OUI	OUI	OUI	NON
NGANHA	128	M	FER,ADV,RAV	OUI	OUI	OUI	NON	NON	NON	NON	NON	NPK	OUI	NON	NON	CEH	OUI	NON	NON	NON	GRA,FAB,CYP	OUI	OUI	OUI	NON
NGANHA	129	F	FER,ADV	OUI	OUI	NON	NON	NON	NON	NON	NON	NPK,UREE	OUI	OUI	NON	CEH,RAD	OUI	OUI	NON	NON	GRA,FAB,CYP	OUI	OUI	OUI	NON
NGANHA	130	F	FER,ADV,RAV	OUI	OUI	OUI	NON	NON	NON	NON	NON	NPK,UREE	OUI	OUI	NON	CEH,RAD	OUI	OUI	NON	NON	GRA,FAB,CYP	OUI	OUI	OUI	NON
NGANHA	131	M	FER	OUI	NON	NON	NON	NON	NON	NON	NON	NPK	OUI	NON	NON	CEH	OUI	NON	NON	NON	GRA,FAB	OUI	OUI	NON	NON
NGANHA	132	M	FER,ADV,RAV	OUI	OUI	OUI	NON	NON	NON	NON	NON	NPK	OUI	NON	NON	CEH	OUI	NON	NON	NON	GRA,FAB,CYP	OUI	OUI	OUI	NON
NGANHA	133	M	FER,ADV	OUI	OUI	NON	NON	NON	NON	NON	NON	NPK,UREE	OUI	OUI	NON	MMO	NON	NON	NON	OUI	GRA,FAB	OUI	OUI	NON	NON
NGANHA	134	F	ADV	NON	OUI	NON	NON	NON	NON	NON	NON	NPK,UREE	OUI	OUI	NON	CEH	OUI	NON	NON	NON	GRA,FAB	OUI	OUI	NON	NON
NGANHA	135	M	FER,ADV,RAV	OUI	OUI	OUI	NON	NON	NON	NON	NON	NPK	OUI	NON	NON	CEH	OUI	NON	NON	NON	GRA,FAB	OUI	OUI	NON	NON
NGANHA	136	M	FER,ADV,RAV	OUI	OUI	OUI	NON	NON	NON	NON	NON	NPK	OUI	NON	NON	CEH,RAD	OUI	OUI	NON	NON	GRA,FAB,CYP	OUI	OUI	OUI	NON
NGANHA	137	M	FER,ADV	OUI	OUI	NON	NON	NON	NON	NON	NON	NPK,UREE	OUI	OUI	NON	CEH,RAD	OUI	OUI	NON	NON	GRA,FAB,CYP	OUI	OUI	OUI	NON
NGANHA	138	M	FER,ADV,RAV	OUI	OUI	OUI	NON	NON	NON	NON	NON	NPK,UREE	OUI	OUI	NON	CEH,RAD	OUI	OUI	NON	NON	GRA,FAB,CYP	OUI	OUI	OUI	NON
NGANHA	139	M	FER,ADV	OUI	OUI	NON	NON	NON	NON	NON	NON	NPK,UREE	OUI	OUI	NON	CEH,RAD	OUI	OUI	NON	NON	GRA,FAB,CYP	OUI	OUI	OUI	NON
NGANHA	140	M	FER	OUI	NON	NON	NON	NON	NON	NON	NON	NPK,UREE	OUI	OUI	NON	CEH,RAD	OUI	OUI	NON	NON	GRA,FAB,CYP	OUI	OUI	OUI	NON
NGANHA	141	F	FER,ADV,RAV	OUI	OUI	OUI	NON	NON	NON	NON	NON	NPK,UREE	OUI	OUI	NON	CEH,RAD	OUI	OUI	NON	NON	GRA,CYP	OUI	NON	OUI	NON
NGANHA	142	M	FER,ADV	OUI	OUI	NON	NON	NON	NON	NON	NON	NPK,UREE	OUI	OUI	NON	CEH	OUI	NON	NON	NON	GRA,FAB	OUI	OUI	NON	NON
NGANHA	143	M	ADV	NON	OUI	NON	NON	NON	NON	NON	NON	NPK,UREE	OUI	OUI	NON	CEH,RAD	OUI	OUI	NON	NON	GRA,FAB	OUI	OUI	NON	NON
NGANHA	144	M	ADV	NON	OUI	NON	NON	NON	NON	NON	NON	NPK,UREE	OUI	OUI	NON	CEH,RAD	OUI	OUI	NON	NON	GRA,FAB	OUI	OUI	NON	NON
NGANHA	145	M	ADV	NON	OUI	NON	NON	NON	NON	NON	NON	NPK,UREE	OUI	OUI	NON	CEH,RAD	OUI	OUI	NON	NON	FAB	NON	OUI	NON	NON
NGANHA	146	M	FER,ADV,RAV	OUI	OUI	OUI	NON	NON	NON	NON	NON	NPK,UREE	OUI	OUI	NON	CEH,EDE	OUI	NON	OUI	NON	GRA,FAB,CYP	OUI	OUI	OUI	NON
NGANHA	147	M	FER,ADV	OUI	OUI	NON	NON	NON	NON	NON	NON	NPK,UREE	OUI	OUI	NON	CEH,EDE	OUI	NON	OUI	NON	GRA,FAB	OUI	OUI	NON	NON
NGANHA	148	M	ADV,RAV	NON	OUI	OUI	NON	NON	NON	NON	NON	NPK,UREE	OUI	OUI	NON	CEH,RAD	OUI	OUI	NON	NON	GRA,FAB	OUI	OUI	NON	NON
NGANHA	149	M	ADV,RAV	NON	OUI	OUI	NON	NON	NON	NON	NON	NPK,UREE	OUI	OUI	NON	CEH,RAD	OUI	OUI	NON	NON	GRA,FAB,CYP	OUI	OUI	OUI	NON
NGANHA	150	M	ADV,RAV	NON	OUI	OUI	NON	NON	NON	NON	NON	NPK,UREE	OUI	OUI	NON	RAD	NON	OUI	NON	NON	GRA	OUI	NON	NON	NON
NGANHA	151	M	ADV,RAV	NON	OUI	OUI	NON	NON	NON	NON	NON	NPK	OUI	NON	NON	MMO,RAD	NON	OUI	NON	OUI	GRA,FAB,CYP	OUI	OUI	OUI	NON
NGANHA	152	M	ADV,RAV	NON	OUI	OUI	NON	NON	NON	NON	NON	NPK,UREE	OUI	OUI	NON	CEH,RAD	OUI	OUI	NON	NON	GRA,FAB,CYP	OUI	OUI	OUI	NON
NGANHA	153	M	ADV,RAV	NON	OUI	OUI	NON	NON	NON	NON	NON	NPK,UREE	OUI	OUI	NON	CEH,EDE	OUI	NON	OUI	NON	GRA,FAB	OUI	OUI	NON	NON
NGANHA	154	M	FER,ADV,RAV	OUI	OUI	OUI	NON	NON	NON	NON	NON	NPK,UREE	OUI	OUI	NON	CEH,EDE	OUI	NON	OUI	NON	GRA,FAB,CYP	OUI	OUI	OUI	NON
NGANHA	155	M	ADV,RAV	NON	OUI	OUI	NON	NON	NON	NON	NON	NPK,UREE	OUI	OUI	NON	CEH,RAD,EDE	OUI	OUI	OUI	NON	GRA,FAB,CYP	OUI	OUI	OUI	NON
NGANHA	156	M	ADV,RAV	NON	OUI	OUI	NON	NON	NON	NON	NON	NPK,UREE	OUI	OUI	NON	CEH,RAD	OUI	OUI	OUI	OUI	GRA,FAB,CYP	OUI	OUI	OUI	NON
NGANHA	157	M	ADV,RAV	NON	OUI	OUI	NON	NON	NON	NON	NON	NPK,UREE	OUI	OUI	NON	CEH	OUI	NON	NON	NON	GRA,FAB	OUI	OUI	NON	NON
NGANHA	158	M	ADV,RAV	NON	OUI	OUI	NON	NON	NON	NON	NON	NPK,UREE	OUI	OUI	NON	CEH,RAD	OUI	OUI	NON	NON	GRA,FAB,CYP	OUI	OUI	OUI	NON
NGANHA	159	M	ADV	NON	OUI	NON	NON	NON	NON	NON	NON	NPK,UREE	OUI	OUI	NON	RAD	NON	OUI	NON	NON	GRA,FAB	OUI	OUI	NON	NON
NGANHA	160	M	ADV	NON	OUI	NON	NON	NON	NON	NON	NON	NPK,UREE	OUI	OUI	NON	CEH	OUI	NON	NON	NON	GRA,FAB,CYP	OUI	OUI	OUI	NON
NGANHA	161	F	ADV,RAV	NON	OUI	OUI	NON	NON	NON	NON	NON	NPK,UREE	OUI	OUI	NON	CEH,RAD	OUI	OUI	NON	NON	GRA,FAB	OUI	OUI	NON	NON
NGANHA	162	M	ADV,RAV	NON	OUI	OUI	NON	NON	NON	NON	NON	NPK,UREE	OUI	OUI	NON	CEH,RAD	OUI	OUI	NON	NON	FAB	NON	OUI	NON	NON
NGANHA	163	M	ADV,RAV	NON	OUI	OUI	NON	NON	NON	NON	NON	NPK,UREE	OUI	OUI	NON	CEH,RAD	OUI	OUI	NON	NON	FAB,AUT	NON	OUI	NON	OUI
NGANHA	164	M	RAV,SEM	NON	NON	OUI	NON	OUI	NON	NON	NON	NPK,UREE	OUI	OUI	NON	CEH,EDE	OUI	NON	OUI	NON	GRA,FAB	OUI	OUI	NON	NON
NGANHA	165	M	RAV,SEM	NON	NON	OUI	NON	OUI	NON	NON	NON	NPK,UREE	OUI	OUI	NON	CEH,EDE	OUI	NON	OUI	NON	GRA,FAB	OUI	OUI	NON	NON
NGANHA	166	M	ADV,RAV	NON	OUI	OUI	NON	NON	NON	NON	NON	NPK,UREE	OUI	OUI	NON	CEH,EDE	OUI	NON	OUI	NON	GRA,FAB,CYP	OUI	OUI	OUI	NON
NGANHA	167	M	ADV	NON	OUI	NON	NON	NON	NON	NON	NON	NPK	OUI	NON	NON	RAD	NON	OUI	NON	NON	GRA,FAB,CYP	OUI	OUI	OUI	NON
NGANHA	168	M	FER,ADV,RAV	OUI	OUI	OUI	NON	NON	NON	NON	NON	NPK	OUI	NON	NON	CEH	OUI	NON	NON	NON	GRA,FAB,CYP	OUI	OUI	OUI	NON
NGANHA	169	M	FER,ADV,RAV	OUI	OUI	OUI	NON	NON	NON	NON	NON	NPK,UREE	OUI	OUI	NON	CEH,RAD	OUI	OUI	NON	NON	GRA,FAB,CYP	OUI	OUI	OUI	NON
NGANHA	170	M	FER,ADV,RAV	OUI	OUI	OUI	NON	NON	NON	NON	NON	NPK,UREE	OUI	OUI	NON	CEH	OUI	NON	NON	NON	GRA,FAB,CYP	OUI	OUI	OUI	NON
NGANHA	171	M	FER,ADV,RAV	OUI	OUI	OUI	NON	NON	NON	NON	NON	NPK,UREE	OUI	OUI	NON	CEH,RAD	OUI	OUI	NON	NON	GRA,FAB	OUI	OUI	NON	NON
NGANHA	172	M	ADV,RAV,SEM	NON	OUI	OUI	NON	OUI	NON	NON	NON	NPK,UREE	OUI	OUI	NON	CEH,RAD	OUI	OUI	NON	NON	GRA,FAB	OUI	OUI	NON	NON
NGANHA	173	M	FER,ADV,RAV	OUI	OUI	OUI	NON	NON	NON	NON	NON	NPK	OUI	NON	NON	CEH	OUI	NON	NON	NON	GRA,FAB,CYP	OUI	OUI	OUI	NON
NGANHA	174	M	FER,ADV	OUI	OUI	NON	NON	NON	NON	NON	NON	NPK,UREE	OUI	OUI	NON	CEH	OUI	NON	NON	NON	GRA,FAB,CYP	OUI	OUI	OUI	NON
NGANHA	175	M	FER,ADV,RAV	OUI	OUI	OUI	NON	NON	NON	NON	NON	NPK	OUI	NON	NON	CEH	OUI	NON	NON	NON	GRA,FAB,CYP	OUI	OUI	OUI	NON
NGANHA	176	F	FER,ADV	OUI	OUI	NON	NON	NON	NON	NON	NON	NPK,UREE	OUI	OUI	NON	CEH,RAD	OUI	OUI	NON	NON	GRA,FAB,CYP	OUI	OUI	OUI	NON
NGANHA	177	F	FER,ADV,RAV	OUI	OUI	OUI	NON	NON	NON	NON	NON	NPK,UREE	OUI	OUI	NON	CEH,RAD	OUI	OUI	NON	NON	GRA,FAB,CYP	OUI	OUI	OUI	NON
NGANHA	178	M	FER	OUI	NON	NON	NON	NON	NON	NON	NON	NPK	OUI	NON	NON	CEH	OUI	NON	NON	NON	GRA,FAB	OUI	OUI	NON	NON
NGANHA	179	M	FER,ADV,RAV	OUI	OUI	OUI	NON	NON	NON	NON	NON	NPK	OUI	NON	NON	CEH	OUI	NON	NON	NON	GRA,FAB,CYP	OUI	OUI	OUI	NON
NGANHA	180	M	FER,ADV	OUI	OUI	NON	NON	NON	NON	NON	NON	NPK,UREE	OUI	OUI	NON	MMO	NON	NON	NON	OUI	GRA,FAB	OUI	OUI	NON	NON
NGANHA	181	F	ADV	NON	OUI	NON	NON	NON	NON	NON	NON	NPK,UREE	OUI	OUI	NON	CEH	OUI	NON	NON	NON	GRA,FAB	OUI	OUI	NON	NON
NGANHA	182	M	FER,ADV,RAV	OUI	OUI	OUI	NON	NON	NON	NON	NON	NPK	OUI	NON	NON	CEH	OUI	NON	NON	NON	GRA,FAB	OUI	OUI	NON	NON
NGANHA	183	M	FER,ADV,RAV	OUI	OUI	OUI	NON	NON	NON	NON	NON	NPK	OUI	NON	NON	CEH,RAD	OUI	OUI	NON	NON	GRA,FAB,CYP	OUI	OUI	OUI	NON
NGANHA	184	M	FER,ADV	OUI	OUI	NON	NON	NON	NON	NON	NON	NPK,UREE	OUI	OUI	NON	CEH,RAD	OUI	OUI	NON	NON	GRA,FAB,CYP	OUI	OUI	OUI	NON
MARTAP	185	M	ADV,RAV	NON	OUI	OUI	NON	NON	NON	NON	NON	NPK	OUI	NON	NON	CEH,RAD	OUI	OUI	NON	NON	GRA,FAB,CYP	OUI	OUI	OUI	NON
MARTAP	186	M	FER,ADV,RAV	OUI	OUI	OUI	NON	NON	NON	NON	NON	NPK,UREE	OUI	OUI	NON	CEH,RAD	OUI	OUI	NON	NON	GRA,FAB	OUI	OUI	NON	NON
MARTAP	187	M	ADV,RAV	NON	OUI	OUI	NON	NON	NON	NON	NON	NPK,UREE	OUI	OUI	NON	CEH,RAD	OUI	OUI	NON	NON	GRA,FAB	OUI	OUI	NON	NON
MARTAP	188	M	ADV,RAV	NON	OUI	OUI	NON	NON	NON	NON	NON	NPK,UREE	OUI	OUI	NON	CEH	OUI	NON	NON	NON	GRA,FAB,CYP	OUI	OUI	OUI	NON
MARTAP	189	M	ADV,RAV	NON	OUI	OUI	NON	NON	NON	NON	NON	NPK,UREE	OUI	OUI	NON	CEH	OUI	NON	NON	NON	GRA,FAB	OUI	OUI	NON	NON
MARTAP	190	M	ADV,RAV	NON	OUI	OUI	NON	NON	NON	NON	NON	NPK	OUI	NON	NON	CEH	OUI	NON	NON	NON	GRA,FAB	OUI	OUI	NON	NON
MARTAP	191	M	FER,ADV,RAV	OUI	OUI	OUI	NON	NON	NON	NON	NON	NPK,UREE	OUI	OUI	NON	CEH	OUI	NON	NON	NON	GRA,FAB,CYP	OUI	OUI	OUI	NON
MARTAP	192	M	FER,ADV,RAV	OUI	OUI	OUI	NON	NON	NON	NON	NON	NPK,UREE	OUI	OUI	NON	CEH	OUI	NON	NON	NON	GRA,FAB	OUI	OUI	NON	NON
MARTAP	193	M	FER,ADV,RAV	OUI	OUI	OUI	NON	NON	NON	NON	NON	NPK	OUI	NON	NON	CEH,RAD	OUI	OUI	NON	NON	GRA,FAB,CYP	OUI	OUI	OUI	NON
MARTAP	194	M	FER,ADV,RAV,MAR,FIN	OUI	OUI	OUI	OUI	NON	NON	OUI	NON	NPK	OUI	NON	NON	CEH	OUI	NON	NON	NON	GRA,FAB,CYP	OUI	OUI	OUI	NON
MARTAP	195	M	FER,ADV,RAV	OUI	OUI	OUI	NON	NON	NON	NON	NON	NPK,UREE	OUI	OUI	NON	CEH	OUI	NON	NON	NON	GRA,FAB,CYP	OUI	OUI	OUI	NON
MARTAP	196	M	ADV,RAV	NON	OUI	OUI	NON	NON	NON	NON	NON	NPK	OUI	NON	NON	CEH	OUI	NON	NON	NON	GRA,FAB	OUI	OUI	NON	NON
MARTAP	197	M	ADV,RAV	NON	OUI	OUI	NON	NON	NON	NON	NON	NPK	OUI	NON	NON	CEH	OUI	NON	NON	NON	GRA,FAB	OUI	OUI	NON	NON
MARTAP	198	M	ADV,RAV	NON	OUI	OUI	NON	NON	NON	NON	NON	NPK,UREE	OUI	OUI	NON	CEH	OUI	NON	NON	NON	GRA,FAB,CYP	OUI	OUI	OUI	NON
MARTAP	199	M	ADV,RAV	NON	OUI	OUI	NON	NON	NON	NON	NON	NPK,UREE	OUI	OUI	NON	CEH	OUI	NON	NON	NON	GRA,FAB,CYP	OUI	OUI	OUI	NON
MARTAP	200	M	ADVA,RAV	NON	OUI	OUI	NON	NON	NON	NON	NON	NPK,UREE	OUI	OUI	NON	CEH	OUI	NON	NON	NON	GRA,FAB	OUI	OUI	NON	NON
MARTAP	201	M	FER,ADV,RAV	OUI	OUI	OUI	NON	NON	NON	NON	NON	NPK,UREE	OUI	OUI	NON	CEH	OUI	NON	NON	NON	GRA,FAB,CYP	OUI	OUI	OUI	NON
MARTAP	202	M	FER,ADV,RAV	OUI	OUI	OUI	NON	NON	NON	NON	NON	NPK,UREE	OUI	OUI	NON	CEH	OUI	NON	NON	NON	GRA,FAB	OUI	OUI	NON	NON
MARTAP	203	M	FER,ADV,RAV	OUI	OUI	OUI	NON	NON	NON	NON	NON	NPK,UREE	OUI	OUI	NON	CEH,RAD	OUI	OUI	NON	NON	GRA,FAB	OUI	OUI	NON	NON
MARTAP	204	M	FER,ADV,RAV,MAR,FIN	OUI	OUI	OUI	OUI	NON	NON	OUI	NON	NPK	OUI	NON	NON	CEH	OUI	NON	NON	NON	GRA,FAB,CYP	OUI	OUI	OUI	NON
MARTAP	205	M	FER,ADV,RAV	OUI	OUI	OUI	NON	NON	NON	NON	NON	NPK,UREE	OUI	OUI	NON	CEH	OUI	NON	NON	NON	GRA,FAB,CYP	OUI	OUI	OUI	NON
MARTAP	206	M	ADV,RAV	NON	OUI	OUI	NON	NON	NON	NON	NON	NPK	OUI	NON	NON	CEH	OUI	NON	NON	NON	GRA,FAB	OUI	OUI	NON	NON
MARTAP	207	M	ADV,RAV	NON	OUI	OUI	NON	NON	NON	NON	NON	NPK	OUI	NON	NON	CEH	OUI	NON	NON	NON	GRA,FAB	OUI	OUI	NON	NON
MARTAP	208	M	ADV,RAV	NON	OUI	OUI	NON	NON	NON	NON	NON	NPK,UREE	OUI	OUI	NON	CEH	OUI	NON	NON	NON	GRA,FAB,CYP	OUI	OUI	OUI	NON
MARTAP	209	M	ADV,RAV	NON	OUI	OUI	NON	NON	NON	NON	NON	NPK,UREE	OUI	OUI	NON	CEH	OUI	NON	NON	NON	GRA,FAB,CYP	OUI	OUI	OUI	NON
MARTAP	210	M	ADV,RAV	NON	OUI	OUI	NON	NON	NON	NON	NON	NPK,UREE	OUI	OUI	NON	CEH,RAD	OUI	OUI	NON	NON	GRA,FAB	OUI	OUI	NON	NON
MARTAP	211	M	FER,ADV,RAV	OUI	OUI	OUI	NON	NON	NON	NON	NON	NPK,UREE	OUI	OUI	NON	CEH,RAD	OUI	OUI	NON	NON	GRA,FAB	OUI	OUI	NON	NON
MARTAP	212	M	ADV,RAV	NON	OUI	OUI	NON	NON	NON	NON	NON	NPK,UREE	OUI	OUI	NON	CEH,RAD	OUI	OUI	NON	NON	GRA,FAB	OUI	OUI	NON	NON
MARTAP	213	M	ADV,RAV	NON	OUI	OUI	NON	NON	NON	NON	NON	NPK,UREE	OUI	OUI	NON	CEH	OUI	NON	NON	NON	GRA,FAB,CYP	OUI	OUI	OUI	NON
MARTAP	214	M	ADV,RAV	NON	OUI	OUI	NON	NON	NON	NON	NON	NPK,UREE	OUI	OUI	NON	CEH	OUI	NON	NON	NON	GRA,FAB	OUI	OUI	NON	NON
MARTAP	215	M	ADV,RAV	NON	OUI	OUI	NON	NON	NON	NON	NON	NPK	OUI	NON	NON	CEH	OUI	NON	NON	NON	GRA,FAB	OUI	OUI	NON	NON
MARTAP	216	M	FER,ADV,RAV	OUI	OUI	OUI	NON	NON	NON	NON	NON	NPK,UREE	OUI	OUI	NON	CEH	OUI	NON	NON	NON	GRA,FAB,CYP	OUI	OUI	OUI	NON
MARTAP	217	M	FER,ADV,RAV	OUI	OUI	OUI	NON	NON	NON	NON	NON	NPK,UREE	OUI	OUI	NON	CEH	OUI	NON	NON	NON	GRA,FAB	OUI	OUI	NON	NON
MARTAP	218	M	FER,ADV,RAV	OUI	OUI	OUI	NON	NON	NON	NON	NON	NPK	OUI	NON	NON	CEH,RAD	OUI	OUI	NON	NON	GRA,FAB,CYP	OUI	OUI	OUI	NON
MARTAP	219	M	FER,ADV,RAV,MAR,FIN	OUI	OUI	OUI	OUI	NON	NON	OUI	NON	NPK	OUI	NON	NON	CEH	OUI	NON	NON	NON	GRA,FAB,CYP	OUI	OUI	OUI	NON
MARTAP	220	M	FER,ADV,RAV	OUI	OUI	OUI	NON	NON	NON	NON	NON	NPK,UREE	OUI	OUI	NON	CEH	OUI	NON	NON	NON	GRA,FAB,CYP	OUI	OUI	OUI	NON
MARTAP	221	M	ADV,RAV	NON	OUI	OUI	NON	NON	NON	NON	NON	NPK	OUI	NON	NON	CEH	OUI	NON	NON	NON	GRA,FAB	OUI	OUI	NON	NON
MARTAP	222	M	ADV,RAV	NON	OUI	OUI	NON	NON	NON	NON	NON	NPK	OUI	NON	NON	CEH	OUI	NON	NON	NON	GRA,FAB	OUI	OUI	NON	NON
MARTAP	223	M	ADV,RAV	NON	OUI	OUI	NON	NON	NON	NON	NON	NPK,UREE	OUI	OUI	NON	CEH	OUI	NON	NON	NON	GRA,FAB,CYP	OUI	OUI	OUI	NON
MARTAP	224	M	ADV,RAV	NON	OUI	OUI	NON	NON	NON	NON	NON	NPK,UREE	OUI	OUI	NON	CEH	OUI	NON	NON	NON	GRA,FAB,CYP	OUI	OUI	OUI	NON
MARTAP	225	M	ADV,RAV	NON	OUI	OUI	NON	NON	NON	NON	NON	NPK,UREE	OUI	OUI	NON	CEH	OUI	NON	NON	NON	GRA,FAB	OUI	OUI	NON	NON
MARTAP	226	M	FER,ADV,RAV	OUI	OUI	OUI	NON	NON	NON	NON	NON	NPK,UREE	OUI	OUI	NON	CEH	OUI	NON	NON	NON	GRA,FAB,CYP	OUI	OUI	OUI	NON
MARTAP	227	M	FER,ADV,RAV	OUI	OUI	OUI	NON	NON	NON	NON	NON	NPK,UREE	OUI	OUI	NON	CEH	OUI	NON	NON	NON	GRA,FAB	OUI	OUI	NON	NON
MARTAP	228	M	FER,ADV,RAV	OUI	OUI	OUI	NON	NON	NON	NON	NON	NPK,UREE	OUI	OUI	NON	CEH,RAD	OUI	OUI	NON	NON	GRA,FAB	OUI	OUI	NON	NON
MARTAP	229	M	FER,ADV,RAV,MAR,FIN	OUI	OUI	OUI	OUI	NON	NON	OUI	NON	NPK	OUI	NON	NON	CEH	OUI	NON	NON	NON	GRA,FAB,CYP	OUI	OUI	OUI	NON
MARTAP	230	M	ADV,RAV	NON	OUI	OUI	NON	NON	NON	NON	NON	NPK	OUI	NON	NON	CEH,RAD	OUI	OUI	NON	NON	GRA,FAB,CYP	OUI	OUI	OUI	NON
MARTAP	231	M	FER,ADV,RAV	OUI	OUI	OUI	NON	NON	NON	NON	NON	NPK,UREE	OUI	OUI	NON	CEH,RAD	OUI	OUI	NON	NON	GRA,FAB	OUI	OUI	NON	NON
MARTAP	232	M	ADV,RAV	NON	OUI	OUI	NON	NON	NON	NON	NON	NPK,UREE	OUI	OUI	NON	CEH,RAD	OUI	OUI	NON	NON	GRA,FAB	OUI	OUI	NON	NON
MARTAP	233	M	ADV,RAV	NON	OUI	OUI	NON	NON	NON	NON	NON	NPK,UREE	OUI	OUI	NON	CEH	OUI	NON	NON	NON	GRA,FAB,CYP	OUI	OUI	OUI	NON
MARTAP	234	M	ADV,RAV	NON	OUI	OUI	NON	NON	NON	NON	NON	NPK,UREE	OUI	OUI	NON	CEH	OUI	NON	NON	NON	GRA,FAB	OUI	OUI	NON	NON
MARTAP	235	M	ADV,RAV	NON	OUI	OUI	NON	NON	NON	NON	NON	NPK	OUI	NON	NON	CEH	OUI	NON	NON	NON	GRA,FAB	OUI	OUI	NON	NON
MARTAP	236	M	FER,ADV,RAV	OUI	OUI	OUI	NON	NON	NON	NON	NON	NPK,UREE	OUI	OUI	NON	CEH	OUI	NON	NON	NON	GRA,FAB,CYP	OUI	OUI	OUI	NON
MARTAP	237	M	FER,ADV,RAV	OUI	OUI	OUI	NON	NON	NON	NON	NON	NPK,UREE	OUI	OUI	NON	CEH	OUI	NON	NON	NON	GRA,FAB	OUI	OUI	NON	NON
MARTAP	238	M	FER,ADV,RAV	OUI	OUI	OUI	NON	NON	NON	NON	NON	NPK	OUI	NON	NON	CEH,RAD	OUI	OUI	NON	NON	GRA,FAB,CYP	OUI	OUI	OUI	NON
MARTAP	239	M	FER,ADV,RAV,MAR,FIN	OUI	OUI	OUI	OUI	NON	NON	OUI	NON	NPK	OUI	NON	NON	CEH	OUI	NON	NON	NON	GRA,FAB,CYP	OUI	OUI	OUI	NON
MARTAP	240	M	FER,ADV,RAV	OUI	OUI	OUI	NON	NON	NON	NON	NON	NPK,UREE	OUI	OUI	NON	CEH	OUI	NON	NON	NON	GRA,FAB,CYP	OUI	OUI	OUI	NON
MARTAP	241	M	ADV,RAV	NON	OUI	OUI	NON	NON	NON	NON	NON	NPK	OUI	NON	NON	CEH	OUI	NON	NON	NON	GRA,FAB	OUI	OUI	NON	NON
MARTAP	242	M	ADV,RAV	NON	OUI	OUI	NON	NON	NON	NON	NON	NPK	OUI	NON	NON	CEH	OUI	NON	NON	NON	GRA,FAB	OUI	OUI	NON	NON
MARTAP	243	M	ADV,RAV	NON	OUI	OUI	NON	NON	NON	NON	NON	NPK,UREE	OUI	OUI	NON	CEH	OUI	NON	NON	NON	GRA,FAB,CYP	OUI	OUI	OUI	NON
MARTAP	244	M	ADV,RAV	NON	OUI	OUI	NON	NON	NON	NON	NON	NPK,UREE	OUI	OUI	NON	CEH	OUI	NON	NON	NON	GRA,FAB,CYP	OUI	OUI	OUI	NON
MARTAP	245	M	ADV,RAV	NON	OUI	OUI	NON	NON	NON	NON	NON	NPK,UREE	OUI	OUI	NON	CEH	OUI	NON	NON	NON	GRA,FAB	OUI	OUI	NON	NON
MARTAP	246	M	FER,ADV,RAV	OUI	OUI	OUI	NON	NON	NON	NON	NON	NPK,UREE	OUI	OUI	NON	CEH	OUI	NON	NON	NON	GRA,FAB,CYP	OUI	OUI	OUI	NON
MARTAP	247	M	FER,ADV,RAV	OUI	OUI	OUI	NON	NON	NON	NON	NON	NPK,UREE	OUI	OUI	NON	CEH	OUI	NON	NON	NON	GRA,FAB	OUI	OUI	NON	NON
MARTAP	248	M	FER,ADV,RAV	OUI	OUI	OUI	NON	NON	NON	NON	NON	NPK,UREE	OUI	OUI	NON	CEH,RAD	OUI	OUI	NON	NON	GRA,FAB	OUI	OUI	NON	NON
MARTAP	249	M	FER,ADV,RAV,MAR,FIN	OUI	OUI	OUI	OUI	NON	NON	OUI	NON	NPK	OUI	NON	NON	CEH	OUI	NON	NON	NON	GRA,FAB,CYP	OUI	OUI	OUI	NON
MARTAP	250	M	FER,ADV,RAV	OUI	OUI	OUI	NON	NON	NON	NON	NON	NPK,UREE	OUI	OUI	NON	CEH	OUI	NON	NON	NON	GRA,FAB,CYP	OUI	OUI	OUI	NON
MARTAP	251	M	ADV,RAV	NON	OUI	OUI	NON	NON	NON	NON	NON	NPK	OUI	NON	NON	CEH	OUI	NON	NON	NON	GRA,FAB	OUI	OUI	NON	NON
MARTAP	252	M	ADV,RAV	NON	OUI	OUI	NON	NON	NON	NON	NON	NPK	OUI	NON	NON	CEH	OUI	NON	NON	NON	GRA,FAB	OUI	OUI	NON	NON
MARTAP	253	M	ADV,RAV	NON	OUI	OUI	NON	NON	NON	NON	NON	NPK,UREE	OUI	OUI	NON	CEH	OUI	NON	NON	NON	GRA,FAB,CYP	OUI	OUI	OUI	NON
MARTAP	254	M	ADV,RAV	NON	OUI	OUI	NON	NON	NON	NON	NON	NPK,UREE	OUI	OUI	NON	CEH	OUI	NON	NON	NON	GRA,FAB,CYP	OUI	OUI	OUI	NON
MARTAP	255	M	ADV,RAV	NON	OUI	OUI	NON	NON	NON	NON	NON	NPK,UREE	OUI	OUI	NON	CEH,RAD	OUI	OUI	NON	NON	GRA,FAB	OUI	OUI	OUI	NON
MARTAP	256	M	FER,ADV,RAV	OUI	OUI	OUI	NON	NON	NON	NON	NON	NPK,UREE	OUI	OUI	NON	CEH,RAD	OUI	OUI	NON	NON	GRA,FAB	OUI	OUI	OUI	NON
MARTAP	257	M	FER,ADV,RAV	OUI	OUI	OUI	NON	NON	NON	NON	NON	NPK,UREE	OUI	OUI	NON	CEH,RAD	OUI	OUI	NON	NON	GRA,FAB	OUI	OUI	OUI	NON
MARTAP	258	M	FER,ADV,RAV	OUI	OUI	OUI	NON	NON	NON	NON	NON	NPK,UREE	OUI	OUI	NON	CEH	OUI	NON	NON	NON	GRA,FAB,CYP	OUI	OUI	OUI	NON
MARTAP	259	M	FER,ADV,RAV	OUI	OUI	OUI	NON	NON	NON	NON	NON	NPK,UREE	OUI	OUI	NON	CEH	OUI	NON	NON	NON	GRA,FAB	OUI	OUI	NON	NON
MARTAP	260	M	FER,ADV,RAV	OUI	OUI	OUI	NON	NON	NON	NON	NON	NPK	OUI	NON	NON	CEH	OUI	NON	NON	NON	GRA,FAB	OUI	OUI	NON	NON
MARTAP	261	M	FER,ADV,RAV	OUI	OUI	OUI	NON	NON	NON	NON	NON	NPK,UREE	OUI	OUI	NON	CEH	OUI	NON	NON	NON	GRA,FAB,CYP	OUI	OUI	OUI	NON
MARTAP	262	M	FER,ADV,RAV	OUI	OUI	OUI	NON	NON	NON	NON	NON	NPK,UREE	OUI	OUI	NON	CEH	OUI	NON	NON	NON	GRA,FAB	OUI	OUI	NON	NON
MARTAP	263	M	FER,ADV,RAV	OUI	OUI	OUI	NON	NON	NON	NON	NON	NPK	OUI	NON	NON	CEH,RAD	OUI	OUI	NON	NON	GRA,FAB,CYP	OUI	OUI	OUI	NON
MARTAP	264	M	FER,ADV,RAV,MAR,FIN	OUI	OUI	OUI	OUI	NON	NON	OUI	NON	NPK	OUI	NON	NON	CEH	OUI	NON	NON	NON	GRA,FAB,CYP	OUI	OUI	OUI	NON
MARTAP	265	M	FER,ADV,RAV	OUI	OUI	OUI	NON	NON	NON	NON	NON	NPK,UREE	OUI	OUI	NON	CEH	OUI	NON	NON	NON	GRA,FAB,CYP	OUI	OUI	OUI	NON
MARTAP	266	M	ADV,RAV	NON	OUI	OUI	NON	NON	NON	NON	NON	NPK	OUI	NON	NON	CEH	OUI	NON	NON	NON	GRA,FAB	OUI	OUI	NON	NON
MARTAP	267	M	FER,ADV,RAV	OUI	OUI	OUI	NON	NON	NON	NON	NON	NPK,UREE	OUI	OUI	NON	CEH	OUI	NON	NON	NON	GRA,FAB,CYP	OUI	OUI	OUI	NON
MARTAP	268	M	FER,ADV,RAV	OUI	OUI	OUI	NON	NON	NON	NON	NON	NPK,UREE	OUI	OUI	NON	CEH	OUI	NON	NON	NON	GRA,FAB	OUI	OUI	NON	NON
MARTAP	269	M	FER,ADV,RAV	OUI	OUI	OUI	NON	NON	NON	NON	NON	NPK,UREE	OUI	OUI	NON	CEH,RAD	OUI	OUI	NON	NON	GRA,FAB	OUI	OUI	NON	NON
MARTAP	270	M	FER,ADV,RAV,MAR,FIN	OUI	OUI	OUI	OUI	NON	NON	OUI	NON	NPK	OUI	NON	NON	CEH	OUI	NON	NON	NON	GRA,FAB,CYP	OUI	OUI	OUI	NON
MARTAP	271	M	FER,ADV,RAV	OUI	OUI	OUI	NON	NON	NON	NON	NON	NPK,UREE	OUI	OUI	NON	CEH	OUI	NON	NON	NON	GRA,FAB,CYP	OUI	OUI	OUI	NON
NDERE III	272	M	ADV,RAV	NON	OUI	OUI	NON	NON	NON	NON	NON	NPK,UREE	OUI	OUI	NON	RAD	NON	OUI	NON	NON	GRA,FAB,CYP	OUI	OUI	OUI	NON
NDERE III	273	M	FER,ADV,HYD	OUI	OUI	NON	NON	NON	NON	NON	OUI	NPK,UREE	OUI	OUI	NON	MMO,RAD	NON	OUI	NON	OUI	GRA,FAB	OUI	OUI	NON	NON
NDERE III	274	M	FER,ADV	OUI	OUI	NON	NON	NON	NON	NON	NON	NPK,UREE	OUI	OUI	NON	MMO,RAD	NON	OUI	NON	OUI	GRA,FAB	OUI	OUI	NON	NON
NDERE III	275	M	ADV,RAV	NON	OUI	OUI	NON	NON	NON	NON	NON	NPK	OUI	NON	NON	MMO,RAD	NON	OUI	NON	OUI	GRA,FAB,CYP	OUI	OUI	OUI	NON
NDERE III	276	M	FER,ADV,RAV,HYD	OUI	OUI	OUI	NON	NON	NON	NON	OUI	NPK,UREE	OUI	OUI	NON	MMO,RAD	NON	OUI	NON	OUI	GRA,FAB	OUI	OUI	NON	NON
NDERE III	277	M	FER,ADV,RAV	OUI	OUI	OUI	NON	NON	NON	NON	NON	BOURSE VACHE,NPK	OUI	NON	OUI	CEH,RAD	OUI	OUI	NON	NON	GRA,FAB,CYP	OUI	OUI	OUI	NON
NDERE III	278	M	FER,ADV,HYD	OUI	OUI	NON	NON	NON	NON	NON	OUI	BOURSE VACHE,NPK	OUI	NON	OUI	MMO	NON	NON	NON	OUI	GRA,FAB,CYP	OUI	OUI	OUI	NON
NDERE III	279	M	FER,ADV,RAV	OUI	OUI	OUI	NON	NON	NON	NON	NON	NPK,UREE	OUI	OUI	NON	CEH,RAD	OUI	OUI	NON	NON	GRA,FAB	OUI	OUI	NON	NON
NDERE III	280	M	ADV,RAV	NON	OUI	OUI	NON	NON	NON	NON	NON	NPK,UREE	OUI	OUI	NON	CEH,RAD	OUI	OUI	NON	NON	GRA,FAB,CYP	OUI	OUI	OUI	NON
NDERE III	281	M	FER,ADV,HYD	OUI	OUI	NON	NON	NON	NON	NON	OUI	NPK,UREE	OUI	OUI	NON	CEH,RAD	OUI	OUI	NON	NON	GRA,FAB,CYP	OUI	OUI	OUI	NON
NDERE III	282	M	FER,ADV,RAV,HYD	OUI	OUI	OUI	NON	NON	NON	NON	OUI	NPK,UREE	OUI	OUI	NON	RAD	NON	OUI	NON	NON	GRA,FAB	OUI	OUI	NON	NON
NDERE III	283	M	FER,ADV	OUI	OUI	NON	NON	NON	NON	NON	NON	BOURSE VACHE	NON	NON	OUI	MMO,CEH,RAD	OUI	OUI	NON	OUI	GRA,FAB	OUI	OUI	NON	NON
NDERE III	284	M	ADV,RAV	NON	OUI	OUI	NON	NON	NON	NON	NON	NPK,UREE	OUI	OUI	NON	CEH,RAD	OUI	OUI	NON	NON	GRA,FAB,CYP	OUI	OUI	OUI	NON
NDERE III	285	M	FER,ADV,RAV	OUI	OUI	OUI	NON	NON	NON	NON	NON	NPK,UREE	OUI	OUI	NON	RAD	NON	OUI	NON	NON	GRA,FAB,CYP	OUI	OUI	OUI	NON
NDERE III	286	F	FER,ADV	OUI	OUI	NON	NON	NON	NON	NON	NON	BOURSE VACHE,NPK	OUI	NON	OUI	MMO,RAD	NON	OUI	NON	OUI	GRA,FAB	OUI	OUI	NON	NON
NDERE III	287	M	ADV,RAV	NON	OUI	OUI	NON	NON	NON	NON	NON	NPK,UREE	OUI	OUI	NON	RAD	NON	OUI	NON	NON	GRA,FAB,CYP	OUI	OUI	OUI	NON
NDERE III	288	M	ADV,RAV	NON	OUI	OUI	NON	NON	NON	NON	NON	NPK,UREE	OUI	OUI	NON	RAD	NON	OUI	NON	NON	GRA,FAB,CYP	OUI	OUI	OUI	NON
NDERE III	289	M	FER,ADV,HYD	OUI	OUI	NON	NON	NON	NON	NON	OUI	NPK,UREE	OUI	OUI	NON	CEH,RAD	OUI	OUI	NON	NON	GRA,FAB	OUI	OUI	NON	NON
NDERE III	290	M	FER,ADV,RAV	OUI	OUI	OUI	NON	NON	NON	NON	NON	BOURSE VACHE,NPK	OUI	NON	OUI	CEH,RAD	OUI	OUI	NON	NON	GRA,FAB,CYP	OUI	OUI	OUI	NON
NDERE III	291	M	ADV,RAV,HYD	NON	OUI	OUI	NON	NON	NON	NON	OUI	NPK,UREE	OUI	OUI	NON	CEH,RAD,MMO	OUI	OUI	NON	OUI	GRA,FAB,CYP	OUI	OUI	OUI	NON
NDERE III	292	M	ADV,RAV	NON	OUI	OUI	NON	NON	NON	NON	NON	NPK,UREE	OUI	OUI	NON	RAD	NON	OUI	NON	NON	GRA,FAB	OUI	OUI	NON	NON
NDERE III	293	M	FER,ADV,RAV	OUI	OUI	OUI	NON	NON	NON	NON	NON	NPK,UREE	OUI	OUI	NON	CEH,RAD	OUI	OUI	NON	NON	GRA,FAB	OUI	OUI	NON	NON
NDERE III	294	M	FER,ADV	OUI	OUI	NON	NON	NON	NON	NON	NON	NPK,UREE	OUI	OUI	NON	CEH,RAD	OUI	OUI	NON	NON	GRA,FAB,CYP	OUI	OUI	OUI	NON
NDERE III	295	M	ADV,RAV	NON	OUI	OUI	NON	NON	NON	NON	NON	NPK,UREE	OUI	OUI	NON	CEH,RAD	OUI	OUI	NON	NON	GRA,FAB,CYP	OUI	OUI	OUI	NON
NDERE III	296	M	ADV,RAV,HYD	NON	OUI	OUI	NON	NON	NON	NON	OUI	BOURSE VACHE,NPK	OUI	NON	OUI	CEH,RAD	OUI	OUI	NON	NON	GRA,FAB	OUI	OUI	NON	NON
NDERE III	297	F	FER,ADV,RAV	OUI	OUI	OUI	NON	NON	NON	NON	NON	BOURSE VACHE	NON	NON	OUI	RAD	NON	OUI	NON	NON	GRA,FAB,CYP	OUI	OUI	OUI	NON
NDERE III	298	M	ADV,RAV	NON	OUI	OUI	NON	NON	NON	NON	NON	NPK,UREE	OUI	OUI	NON	RAD	NON	OUI	NON	NON	GRA,FAB,CYP	OUI	OUI	OUI	NON
NDERE III	299	M	ADV,RAV	NON	OUI	OUI	NON	NON	NON	NON	NON	NPK,UREE	OUI	OUI	NON	CEH,RAD	OUI	OUI	NON	NON	GRA,FAB	OUI	OUI	NON	NON
NDERE III	300	M	ADV,RAV	NON	OUI	OUI	NON	NON	NON	NON	NON	NPK,UREE	OUI	OUI	NON	RAD	NON	OUI	NON	NON	GRA,FAB,CYP	OUI	OUI	OUI	NON
NDERE III	301	M	FER,ADV	OUI	OUI	NON	NON	NON	NON	NON	NON	BOURSE VACHE,NPK	OUI	NON	OUI	RAD	NON	OUI	NON	NON	GRA,FAB	OUI	OUI	NON	NON
NDERE III	302	M	ADV,RAV	NON	OUI	OUI	NON	NON	NON	NON	NON	NPK,UREE	OUI	OUI	NON	RAD	NON	OUI	NON	NON	GRA,FAB,CYP	OUI	OUI	OUI	NON
NDERE III	303	M	FER,ADV,RAV	OUI	OUI	OUI	NON	NON	NON	NON	NON	NPK,UREE	OUI	OUI	NON	MMO,RAD	NON	OUI	NON	OUI	GRA,FAB	OUI	OUI	NON	NON
NDERE III	304	M	FER,ADV	OUI	OUI	NON	NON	NON	NON	NON	NON	NPK,UREE	OUI	OUI	NON	MMO,RAD	NON	OUI	NON	OUI	GRA,FAB	OUI	OUI	NON	NON
NDERE III	305	M	ADV,RAV	NON	OUI	OUI	NON	NON	NON	NON	NON	NPK	OUI	NON	NON	MMO,RAD	NON	OUI	NON	OUI	GRA,FAB,CYP	OUI	OUI	OUI	NON
NDERE III	306	M	FER,ADV,RAV,HYD	OUI	OUI	OUI	NON	NON	NON	NON	OUI	NPK,UREE	OUI	OUI	NON	MMO,RAD	NON	OUI	NON	OUI	GRA,FAB	OUI	OUI	NON	NON
NDERE III	307	M	FER,ADV,RAV	OUI	OUI	OUI	NON	NON	NON	NON	NON	BOURSE VACHE,NPK	OUI	NON	OUI	CEH,RAD	OUI	OUI	NON	NON	GRA,FAB,CYP	OUI	OUI	OUI	NON
NDERE III	308	M	FER,ADV,HYD	OUI	OUI	NON	NON	NON	NON	NON	OUI	BOURSE VACHE,NPK	OUI	NON	OUI	MMO	NON	NON	NON	OUI	GRA,FAB,CYP	OUI	OUI	OUI	NON
NDERE III	309	M	FER,ADV,RAV	OUI	OUI	OUI	NON	NON	NON	NON	NON	NPK,UREE	OUI	OUI	NON	CEH,RAD	OUI	OUI	NON	NON	GRA,FAB	OUI	OUI	NON	NON
NDERE III	310	M	ADV,RAV	NON	OUI	OUI	NON	NON	NON	NON	NON	NPK,UREE	OUI	OUI	NON	CEH,RAD	OUI	OUI	NON	NON	GRA,FAB,CYP	OUI	OUI	OUI	NON
NDERE III	311	M	FER,ADV,HYD	OUI	OUI	NON	NON	NON	NON	NON	OUI	NPK,UREE	OUI	OUI	NON	CEH,RAD	OUI	OUI	NON	NON	GRA,FAB,CYP	OUI	OUI	OUI	NON
NDERE III	312	M	FER,ADV,RAV,HYD	OUI	OUI	OUI	NON	NON	NON	NON	OUI	NPK,UREE	OUI	OUI	NON	RAD	NON	OUI	NON	NON	GRA,FAB	OUI	OUI	NON	NON
NDERE III	313	M	FER,ADV	OUI	OUI	NON	NON	NON	NON	NON	NON	BOURSE VACHE	NON	NON	OUI	MMO,CEH,RAD	OUI	OUI	NON	OUI	GRA,FAB	OUI	OUI	NON	NON
NDERE III	314	M	ADV,RAV	NON	OUI	OUI	NON	NON	NON	NON	NON	NPK,UREE	OUI	OUI	NON	CEH,RAD	OUI	OUI	NON	NON	GRA,FAB,CYP	OUI	OUI	OUI	NON
NDERE III	315	M	FER,ADV,RAV	OUI	OUI	OUI	NON	NON	NON	NON	NON	NPK,UREE	OUI	OUI	NON	RAD	NON	OUI	NON	NON	GRA,FAB,CYP	OUI	OUI	OUI	NON
NDERE III	316	F	FER,ADV	OUI	OUI	NON	NON	NON	NON	NON	NON	BOURSE VACHE,NPK	OUI	NON	OUI	MMO,RAD	NON	OUI	NON	OUI	GRA,FAB	OUI	OUI	NON	NON
NDERE III	317	M	ADV,RAV	NON	OUI	OUI	NON	NON	NON	NON	NON	NPK,UREE	OUI	OUI	NON	RAD	NON	OUI	NON	NON	GRA,FAB,CYP	OUI	OUI	OUI	NON
NDERE III	318	M	ADV,RAV	NON	OUI	OUI	NON	NON	NON	NON	NON	NPK,UREE	OUI	OUI	NON	RAD	NON	OUI	NON	NON	GRA,FAB,CYP	OUI	OUI	OUI	NON
NDERE III	319	M	FER,ADV,HYD	OUI	OUI	NON	NON	NON	NON	NON	OUI	NPK,UREE	OUI	OUI	NON	CEH,RAD	OUI	OUI	NON	NON	GRA,FAB	OUI	OUI	NON	NON
NDERE III	320	M	FER,ADV,RAV	OUI	OUI	OUI	NON	NON	NON	NON	NON	BOURSE VACHE,NPK	OUI	NON	OUI	CEH,RAD	OUI	OUI	NON	NON	GRA,FAB,CYP	OUI	OUI	OUI	NON
NDERE III	321	M	ADV,RAV,HYD	NON	OUI	OUI	NON	NON	NON	NON	OUI	NPK,UREE	OUI	OUI	NON	MMO,CEH,RAD	OUI	OUI	NON	OUI	GRA,FAB,CYP	OUI	OUI	OUI	NON
NDERE III	322	M	ADV,RAV	NON	OUI	OUI	NON	NON	NON	NON	NON	NPK,UREE	OUI	OUI	NON	RAD	NON	OUI	NON	NON	GRA,FAB,CYP	OUI	OUI	OUI	NON
NDERE III	323	M	FER,ADV,RAV	OUI	OUI	OUI	NON	NON	NON	NON	NON	NPK,UREE	OUI	OUI	NON	CEH,RAD	OUI	OUI	NON	NON	GRA,FAB	OUI	OUI	NON	NON
NDERE III	324	M	FER,ADV	OUI	OUI	NON	NON	NON	NON	NON	NON	NPK,UREE	OUI	OUI	NON	CEH,RAD	OUI	OUI	NON	NON	GRA,FAB,CYP	OUI	OUI	OUI	NON
NDERE III	325	M	ADV,RAV	NON	OUI	OUI	NON	NON	NON	NON	NON	NPK,UREE	OUI	OUI	NON	CEH,RAD	OUI	OUI	NON	NON	GRA,FAB,CYP	OUI	OUI	OUI	NON
NDERE III	326	M	ADV,RAV,HYD	NON	OUI	OUI	NON	NON	NON	NON	OUI	BOURSE VACHE,NPK	OUI	NON	OUI	CEH,RAD	OUI	OUI	NON	NON	GRA,FAB	OUI	OUI	NON	NON
NDERE III	327	F	FER,ADV,RAV	OUI	OUI	OUI	NON	NON	NON	NON	NON	BOURSE VACHE	NON	NON	OUI	RAD	NON	OUI	NON	NON	GRA,FAB,CYP	OUI	OUI	OUI	NON
NDERE III	328	M	ADV,RAV	NON	OUI	OUI	NON	NON	NON	NON	NON	NPK,UREE	OUI	OUI	NON	RAD	NON	OUI	NON	NON	GRA,FAB,CYP	OUI	OUI	OUI	NON
NDERE III	329	M	FER,ADV	OUI	OUI	NON	NON	NON	NON	NON	NON	NPK,UREE	OUI	OUI	NON	MMO,RAD	NON	OUI	NON	OUI	GRA,FAB	OUI	OUI	NON	NON
NDERE III	330	M	ADV,RAV	NON	OUI	OUI	NON	NON	NON	NON	NON	NPK	OUI	NON	NON	MMO,RAD	NON	OUI	NON	OUI	GRA,FAB,CYP	OUI	OUI	OUI	NON
NDERE III	331	M	FER,ADV,RAV,HYD	OUI	OUI	OUI	NON	NON	NON	NON	OUI	NPK,UREE	OUI	OUI	NON	MMO,RAD	NON	OUI	NON	OUI	GRA,FAB	OUI	OUI	NON	NON
NDERE III	332	M	FER,ADV,RAV	OUI	OUI	OUI	NON	NON	NON	NON	NON	BOURSE VACHE,NPK	OUI	NON	OUI	CEH,RAD	OUI	OUI	NON	NON	GRA,FAB,CYP	OUI	OUI	OUI	NON
NDERE III	333	M	FER,ADV,RAV	OUI	OUI	OUI	NON	NON	NON	NON	NON	BOURSE VACHE,NPK	OUI	NON	OUI	MMO	NON	NON	NON	OUI	GRA,FAB,CYP	OUI	OUI	OUI	NON
NDERE III	334	M	FER,ADV,RAV	OUI	OUI	OUI	NON	NON	NON	NON	NON	NPK,UREE	OUI	OUI	NON	CEH,RAD	OUI	OUI	NON	NON	GRA,FAB	OUI	OUI	NON	NON
NDERE III	335	M	ADV,RAV	NON	OUI	OUI	NON	NON	NON	NON	NON	NPK,UREE	OUI	OUI	NON	CEH,RAD	OUI	OUI	NON	NON	GRA,FAB,CYP	OUI	OUI	OUI	NON
NDERE III	336	M	FER,ADV,HYD	OUI	OUI	NON	NON	NON	NON	NON	OUI	NPK,UREE	OUI	OUI	NON	CEH,RAD	OUI	OUI	NON	NON	GRA,FAB,CYP	OUI	OUI	OUI	NON
NDERE III	337	M	FER,ADV,RAV,HYD	OUI	OUI	OUI	NON	NON	NON	NON	OUI	NPK,UREE	OUI	OUI	NON	RAD	NON	OUI	NON	NON	GRA,FAB	OUI	OUI	NON	NON
NDERE III	338	M	FER,ADV	OUI	OUI	NON	NON	NON	NON	NON	NON	BOURSE VACHE	NON	NON	OUI	MMO,CEH,RAD	OUI	OUI	NON	OUI	GRA,FAB	OUI	OUI	NON	NON
NDERE III	339	M	ADV,RAV	NON	OUI	OUI	NON	NON	NON	NON	NON	NPK,UREE	OUI	OUI	NON	CEH,RAD	OUI	OUI	NON	NON	GRA,FAB,CYP	OUI	OUI	OUI	NON
NDERE III	340	M	FER,ADV,RAV	OUI	OUI	OUI	NON	NON	NON	NON	NON	NPK,UREE	OUI	OUI	NON	RAD	NON	OUI	NON	NON	GRA,FAB,CYP	OUI	OUI	OUI	NON
NDERE III	341	F	FER,ADV	OUI	OUI	NON	NON	NON	NON	NON	NON	BOURSE VACHE,NPK	OUI	NON	OUI	MMO,RAD	NON	OUI	NON	OUI	GRA,FAB	OUI	OUI	NON	NON
NDERE III	342	M	ADV,RAV	NON	OUI	OUI	NON	NON	NON	NON	NON	NPK,UREE	OUI	OUI	NON	RAD	NON	OUI	NON	NON	GRA,FAB,CYP	OUI	OUI	OUI	NON
NDERE III	343	M	ADV,RAV	NON	OUI	OUI	NON	NON	NON	NON	NON	NPK,UREE	OUI	OUI	NON	RAD	NON	OUI	NON	NON	GRA,FAB,CYP	OUI	OUI	OUI	NON
NDERE III	344	M	FER,ADV,HYD	OUI	OUI	NON	NON	NON	NON	NON	OUI	NPK,UREE	OUI	OUI	NON	CEH,RAD	OUI	OUI	NON	NON	GRA,FAB	OUI	OUI	NON	NON
NDERE III	345	M	FER,ADV,RAV	OUI	OUI	OUI	NON	NON	NON	NON	NON	BOURSE VACHE,NPK	OUI	NON	OUI	CEH,RAD	OUI	OUI	NON	NON	GRA,FAB,CYP	OUI	OUI	OUI	NON
NDERE III	346	M	ADV,RAV,HYD	NON	OUI	OUI	NON	NON	NON	NON	OUI	NPK,UREE	OUI	OUI	NON	MMO,CEH,RAD	OUI	OUI	NON	OUI	GRA,FAB,CYP	OUI	OUI	OUI	NON
NDERE III	347	M	ADV,RAV	NON	OUI	OUI	NON	NON	NON	NON	NON	NPK,UREE	OUI	OUI	NON	RAD	NON	OUI	NON	NON	GRA,FAB	OUI	OUI	NON	NON
NDERE III	348	M	FER,ADV,RAV	OUI	OUI	OUI	NON	NON	NON	NON	NON	NPK,UREE	OUI	OUI	NON	CEH,RAD	OUI	OUI	NON	NON	GRA,FAB	OUI	OUI	NON	NON
NDERE III	349	M	FER,ADV	OUI	OUI	NON	NON	NON	NON	NON	NON	NPK,UREE	OUI	OUI	NON	CEH,RAD	OUI	OUI	NON	NON	GRA,FAB,CYP	OUI	OUI	OUI	NON
NDERE III	350	M	ADV,RAV	NON	OUI	OUI	NON	NON	NON	NON	NON	NPK,UREE	OUI	OUI	NON	CEH,RAD	OUI	OUI	NON	NON	GRA,FAB,CYP	OUI	OUI	OUI	NON
NDERE III	351	M	ADV,RAV,HYD	NON	OUI	OUI	NON	NON	NON	NON	OUI	BOURSE VACHE,NPK	OUI	NON	OUI	CEH,RAD	OUI	OUI	NON	NON	GRA,FAB	OUI	OUI	NON	NON
NDERE III	352	F	FER,ADV,RAV	OUI	OUI	OUI	NON	NON	NON	NON	NON	BOURSE VACHE	NON	NON	NON	RAD	NON	OUI	NON	NON	GRA,FAB,CYP	OUI	OUI	OUI	NON
NDERE III	353	M	ADV,RAV	NON	OUI	OUI	NON	NON	NON	NON	NON	NPK,UREE	OUI	OUI	NON	RAD	NON	OUI	NON	NON	GRA,FAB,CYP	OUI	OUI	OUI	NON
NDERE III	354	M	ADV,RAV	NON	OUI	OUI	NON	NON	NON	NON	NON	NPK,UREE	OUI	OUI	NON	RAD	NON	OUI	NON	NON	GRA,FAB,CYP	OUI	OUI	OUI	NON
