# Supplementary material for: Comparative evaluation of the performance of nine Machine Learning models for predicting corn yield based on uncalibrated empirical data in Cameroon
Source: Research Square preprint supplement (doi:10.21203/rs.3.rs-8046361/v1), 2026-01-19
Supplement: Supplementary file 1 [file 81bbf609ad13faafb85ea471.pdf]

# SURVEY SHEET

## Characterization of Maize-Based Cropping Systems in the Adamaoua Region

### Part 1: General Information

Farmer's Name:

Gender:

Male

Female

Age:

Phone Number:

Education Level:

No formal education

Primary education

Secondary education

Higher education

Farm Location:

Village:

District:

Marital Status:

Single:

Married:

Divorced:

Number of Household Members:

Main Activity:

Land Acquisition Method:

Inheritance:

Purchase:

Gift:

Other:

Purpose of Maize Production:

Consumption:

Sale:

Consumption and Sale:

Other:

### Part 2: Maize-Based Cropping Systems

Total Farm Area (ha):

Area Cultivated with Maize (ha):

Cropping Systems Practiced:

Maize Monoculture

Intercropping (specify species):

Crop Rotation (specify crops involved):

Other (specify):

What are the reasons for choosing the practiced cropping system?

-

-

-

Seeding Density (seeds/ha):

Inter-row Spacing (cm):

Intra-row Spacing (cm):

What maize variety do you use?

Traditional

Improved (specify)

What yield did you obtain in the last season:

Fertilization Practices:

Organic Fertilizers (type and quantity):

Chemical Fertilizers (type and quantity):

Organic and Mineral (type and quantity)

Application Frequency:

Water Management Practices:

Irrigation (type and frequency):

Rainfed:

Soil Preparation Methods:

Plowing (depth and frequency):

Direct Seeding:

Other (specify):

Main Constraints in Maize Cultivation:

Soil Fertility Problems (specify):

Weed Pressure

Pest and Disease Pressure (specify):

Water Insufficiency (critical periods):

Lack of Quality Seeds (varieties used):

Mechanization Problems (equipment used and lacking):

Market Access Difficulties (market type and distance):

Financial Constraints (access to credit):

Other (specify):

How many years have you been cultivating this plot:

What soil fertility management techniques do you practice?

# SURVEY SHEET

## Characterization of Maize-Based Cropping Systems in the Adamaoua Region

Fallow  
Organic Amendment (Specify)

Cover Crops (Specify)

Chemical Fertilizer (Specify)

Other

Access to Agricultural Extension Services:

Yes  
No

Support Needed to Improve Maize Cultivation:

Technical training on best agricultural practices;

Access to quality agricultural inputs (fertilizers, seeds);

Improved water access (irrigation);

Better market access (cooperatives, transport);

Financial support (microcredit, subsidies);

Other (specify):

How much do you spend to establish 1 hectare of maize:

How much do you earn from 1 hectare of maize:

Where do you sell your maize:

### Part 3: Weed Management

Main Weeds Affecting Maize Fields:

Grasses (specify species):

Legumes (specify species):

Sedges (specify species):

Other (specify species):

Weed Control Methods:

Manual Weeding (frequency and period):

Mechanical Weeding (tool type and frequency):

Herbicide Application (type, dosage and frequency):

Mulching (type and renewal frequency):

Crop Rotations (specify rotations):

Cover Crops (specify species):

No-till Techniques:

Integrated Weed Management (specify):

Other (specify):

What is the cost of the weed control method used:

Perceived Effectiveness of Weed Control Methods:

Very effective  
Effective  
Moderately effective  
Slightly effective  
Ineffective

Constraints in Weed Management:

Lack of labor  
High cost of herbicides  
Herbicide resistance in weeds

Lack of access to effective weeding equipment

Unfavorable weather conditions  
Lack of knowledge on optimal weed management practices  
Other (specify):

Do weeds cause yield losses in your field? IF YES, ESTIMATE

Yes  
No

### Part 4: Suggestions and Recommendations
